# Supplementary material
Source: publisher figshare collection journal article supplement (https://tandf.figshare.com/articles/dataset/_/5764659)

# Savage .22 cal Rifle 20 Hz

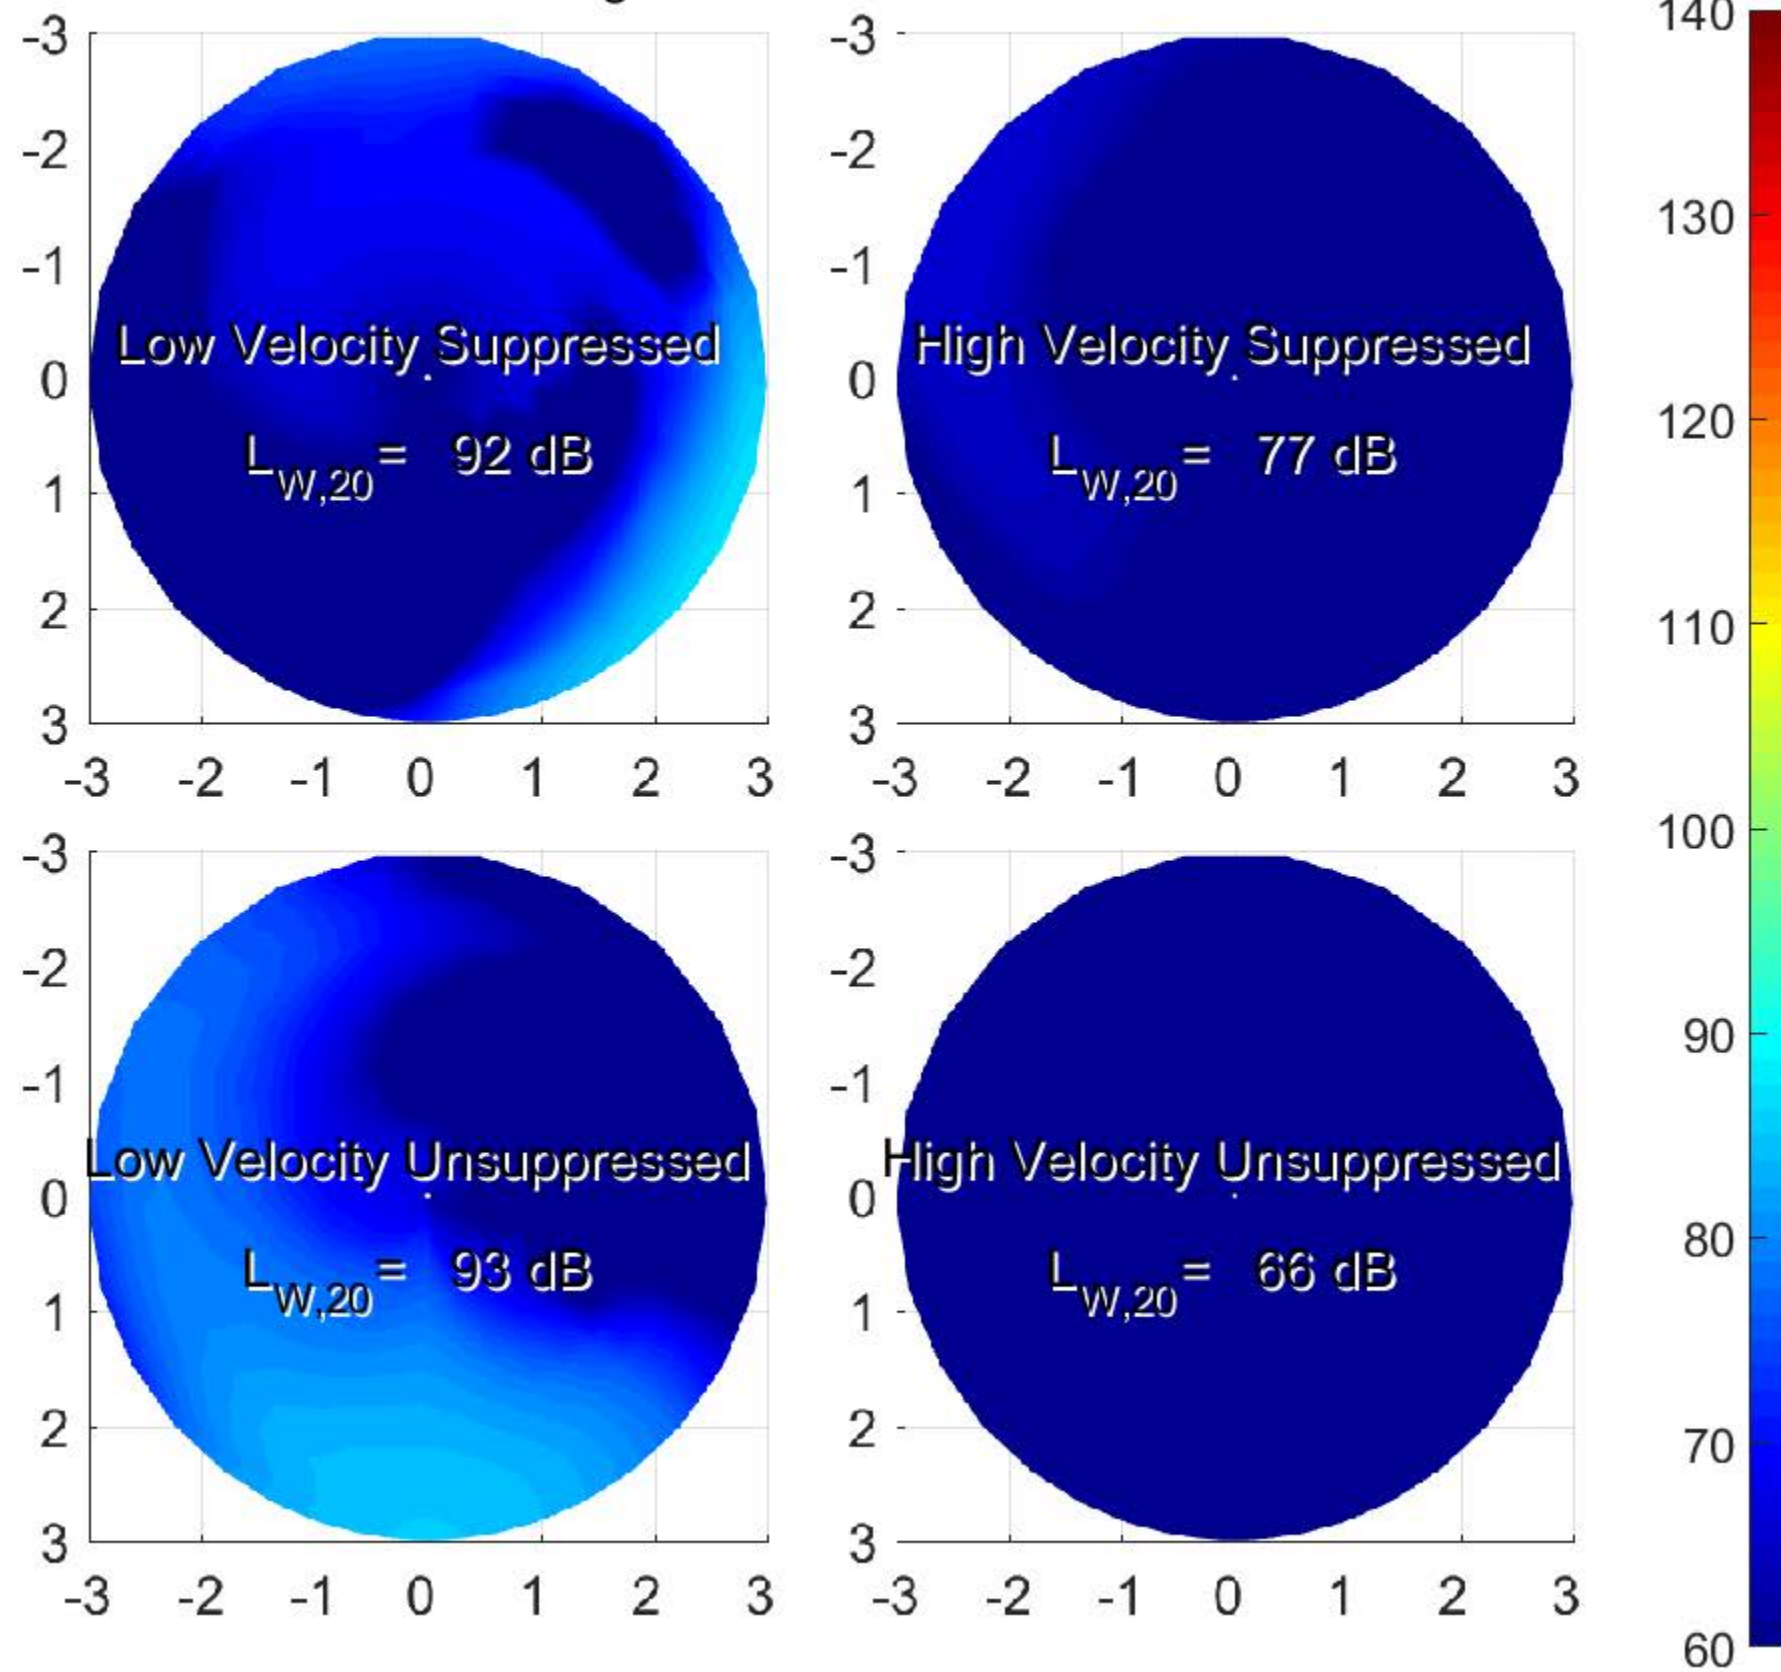

# Savage .22 cal Rifle 25 Hz

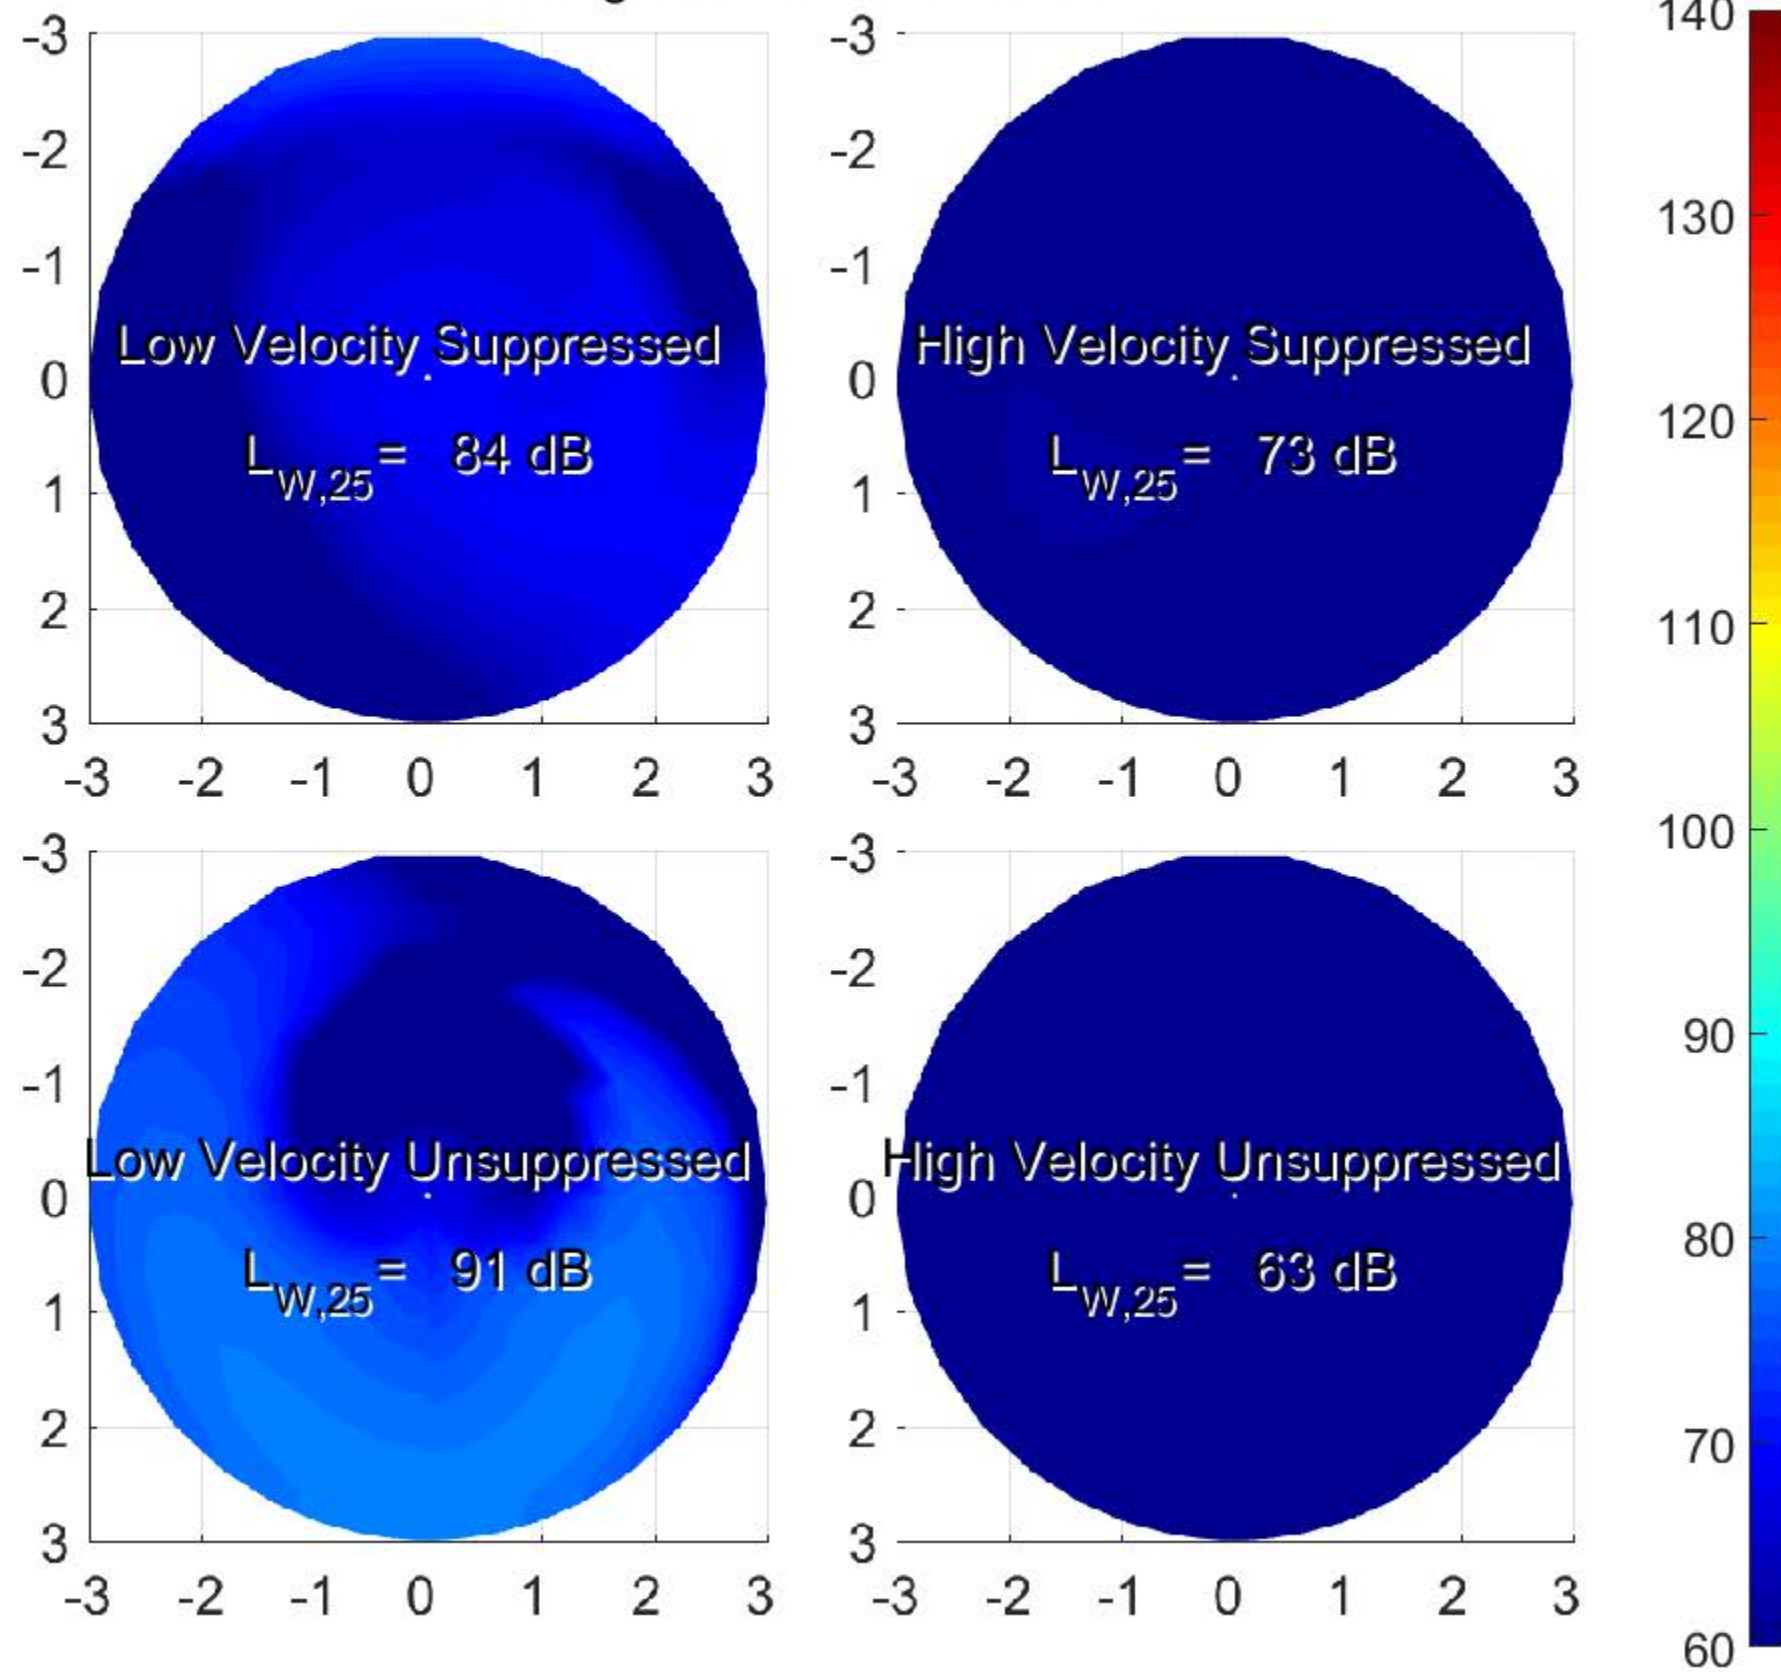

# Savage .22 cal Rifle 32 Hz

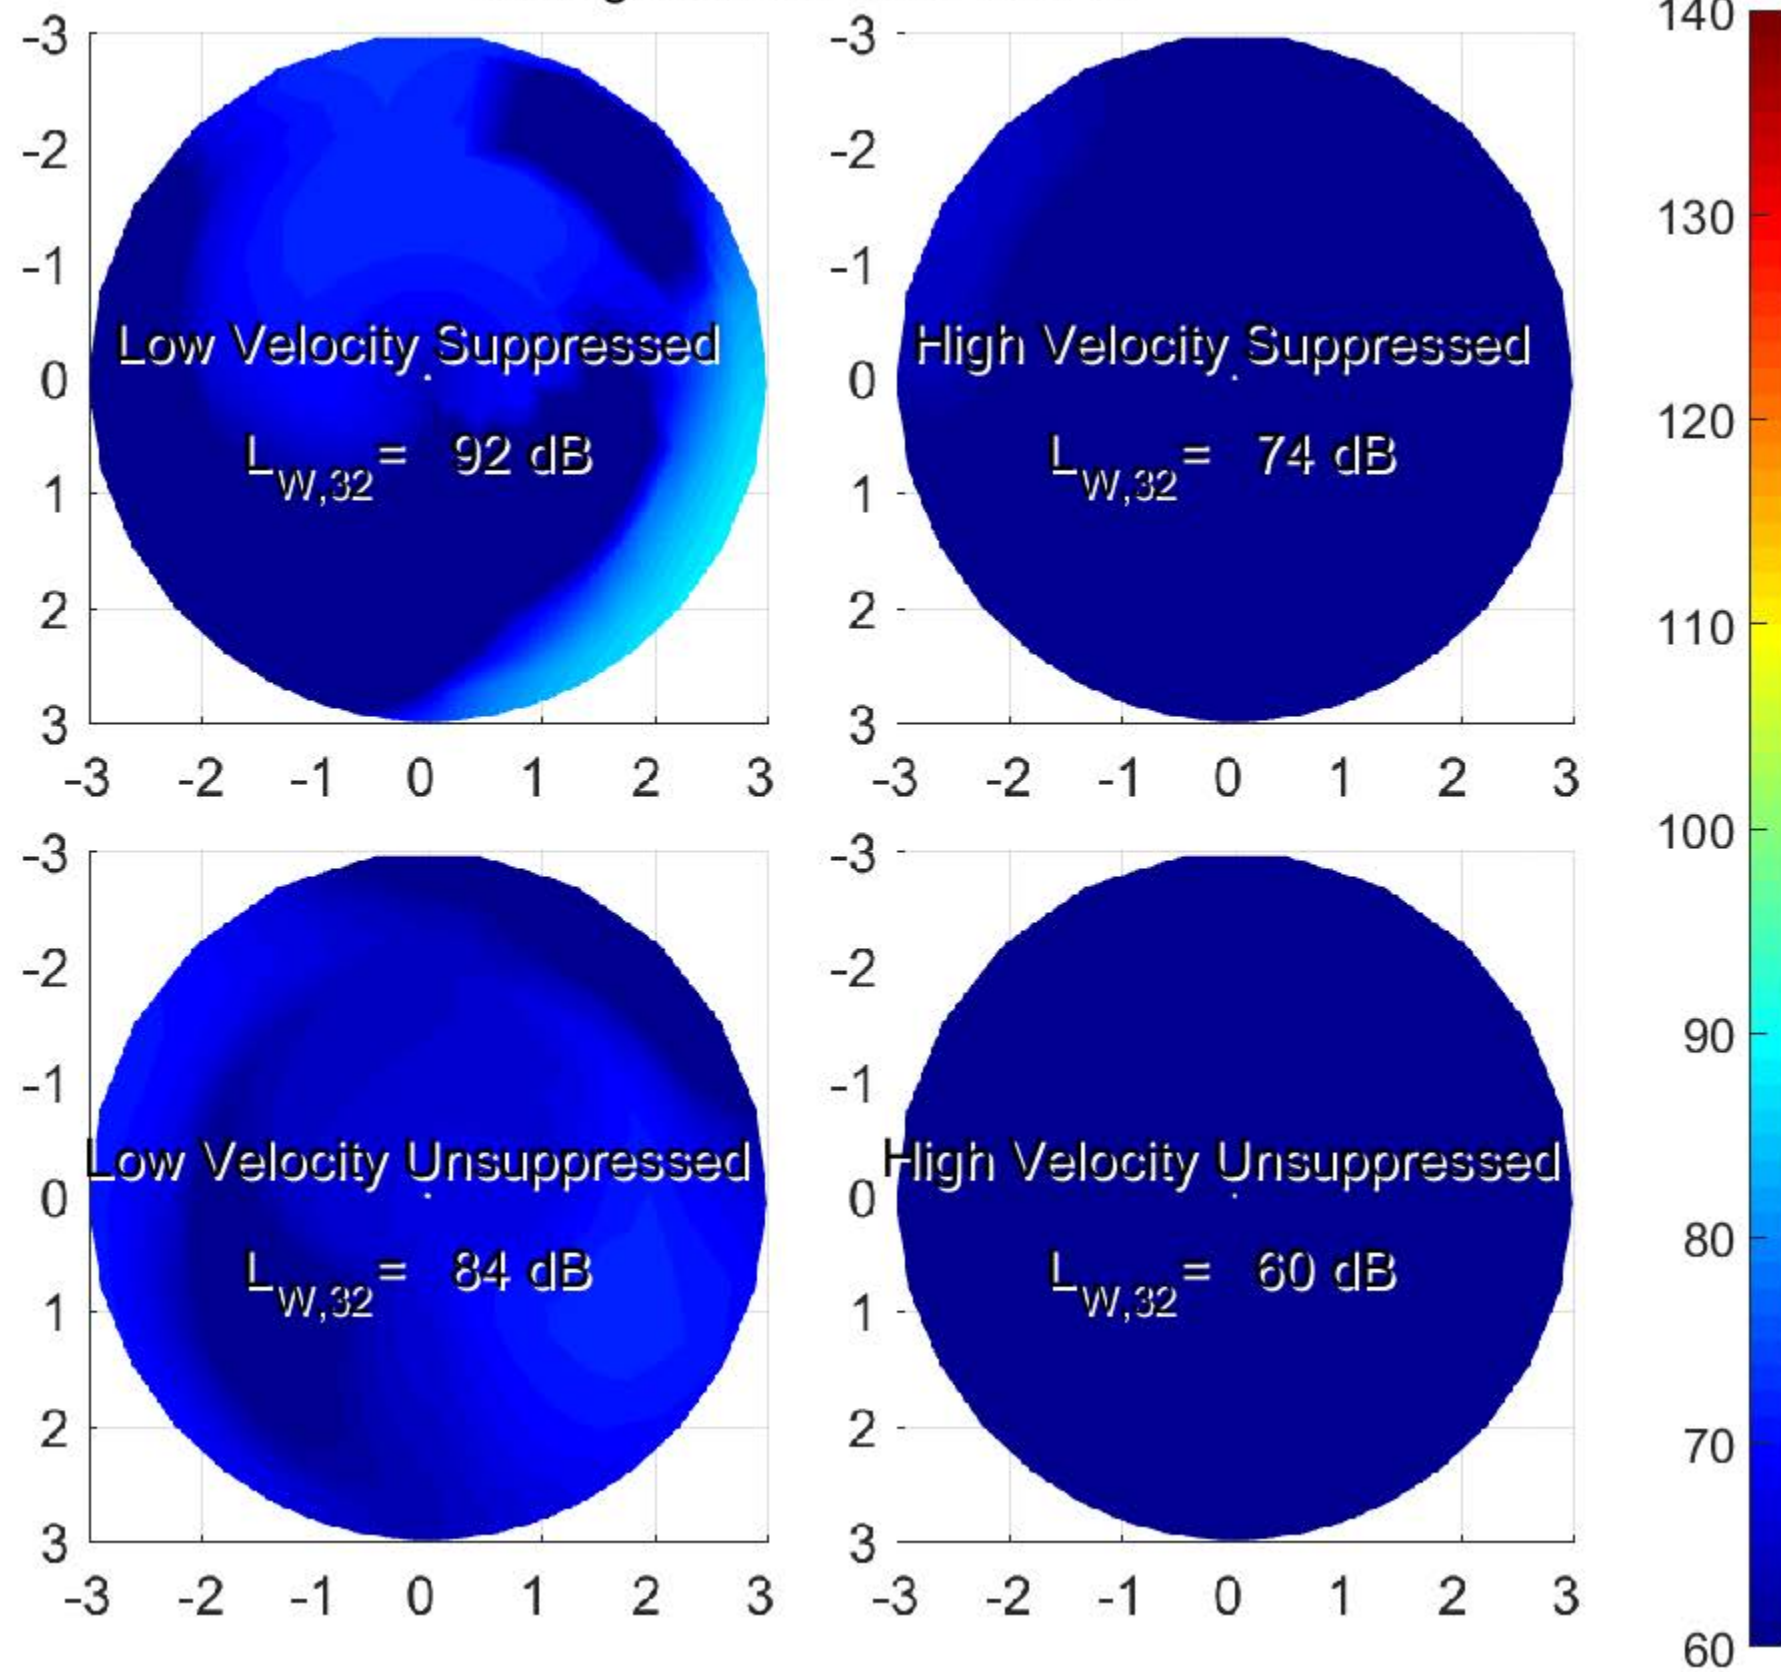

# Savage .22 cal Rifle 40 Hz

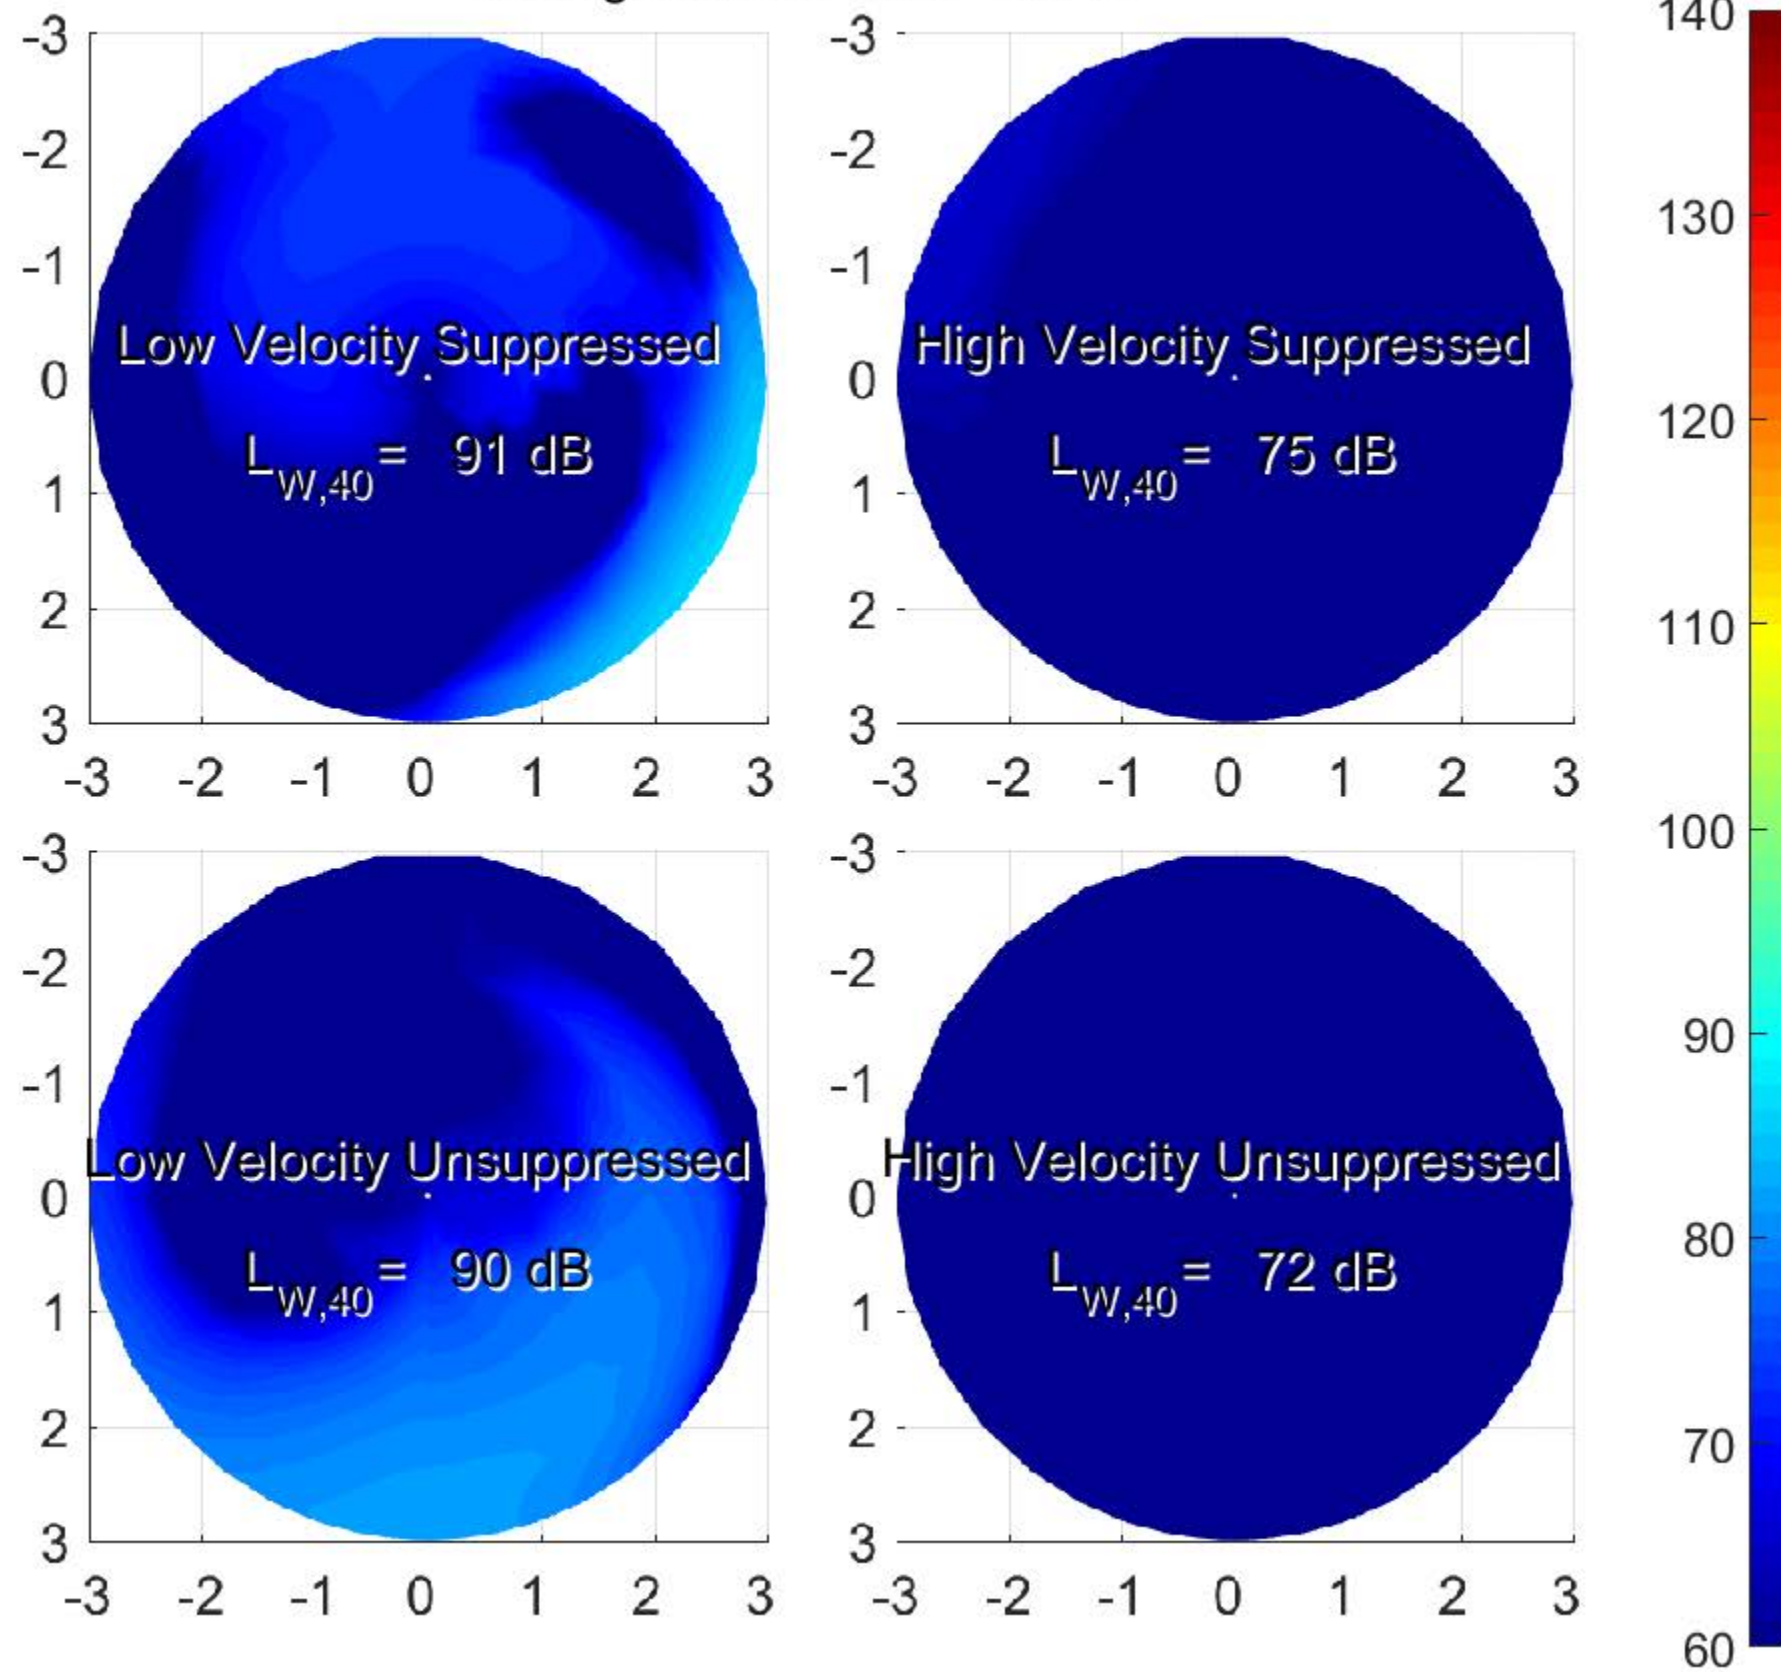

# Savage .22 cal Rifle 50 Hz

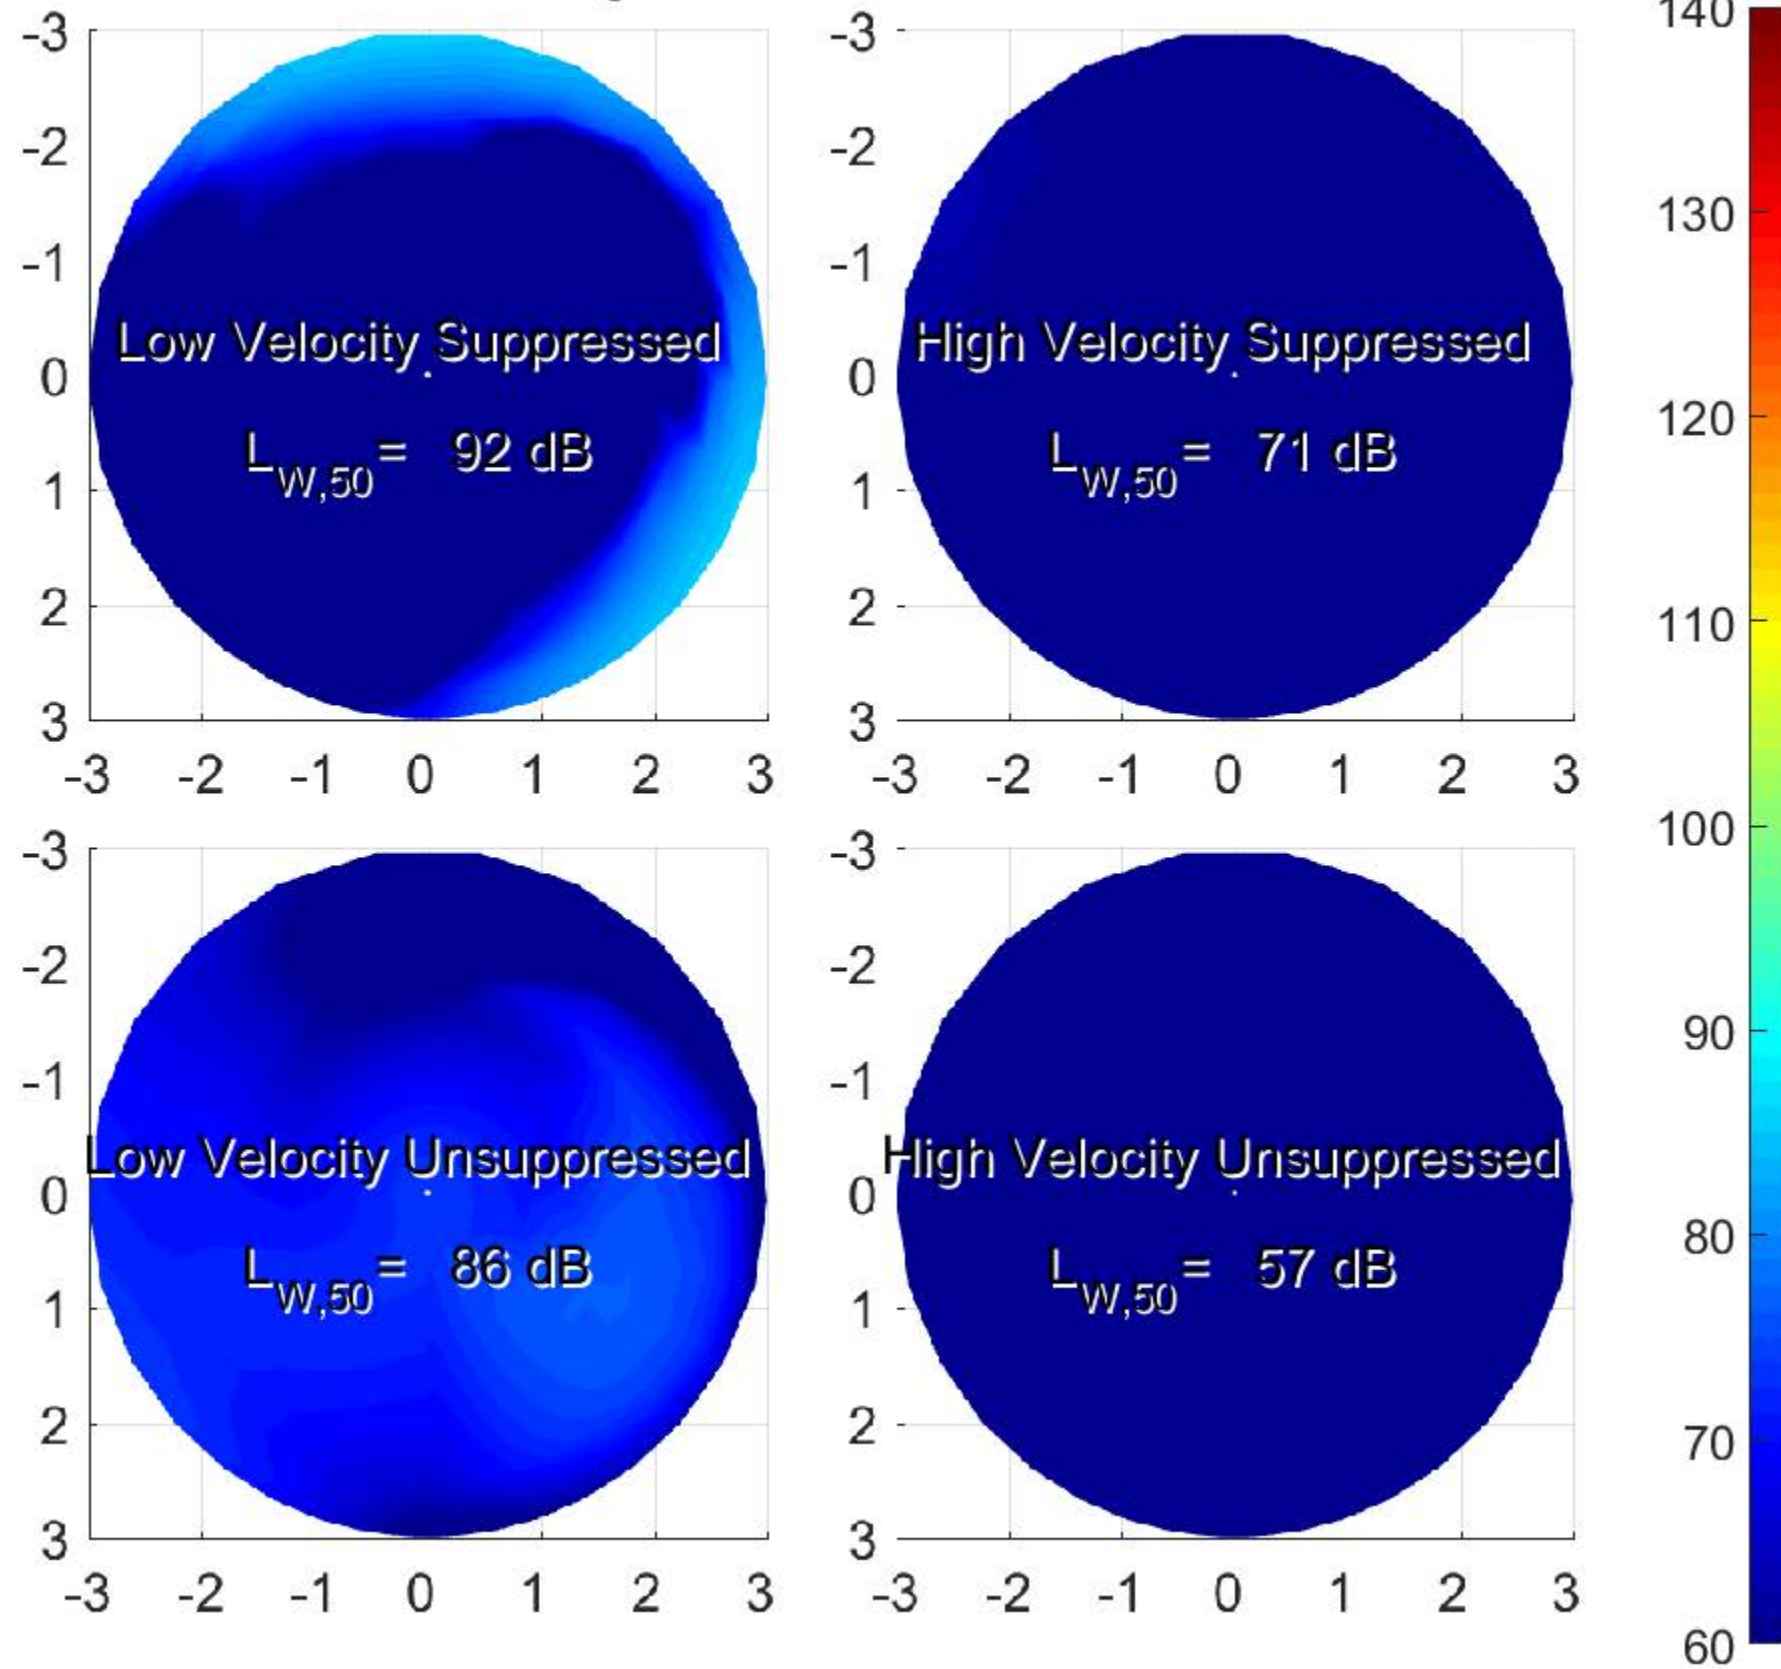

# Savage .22 cal Rifle 63 Hz

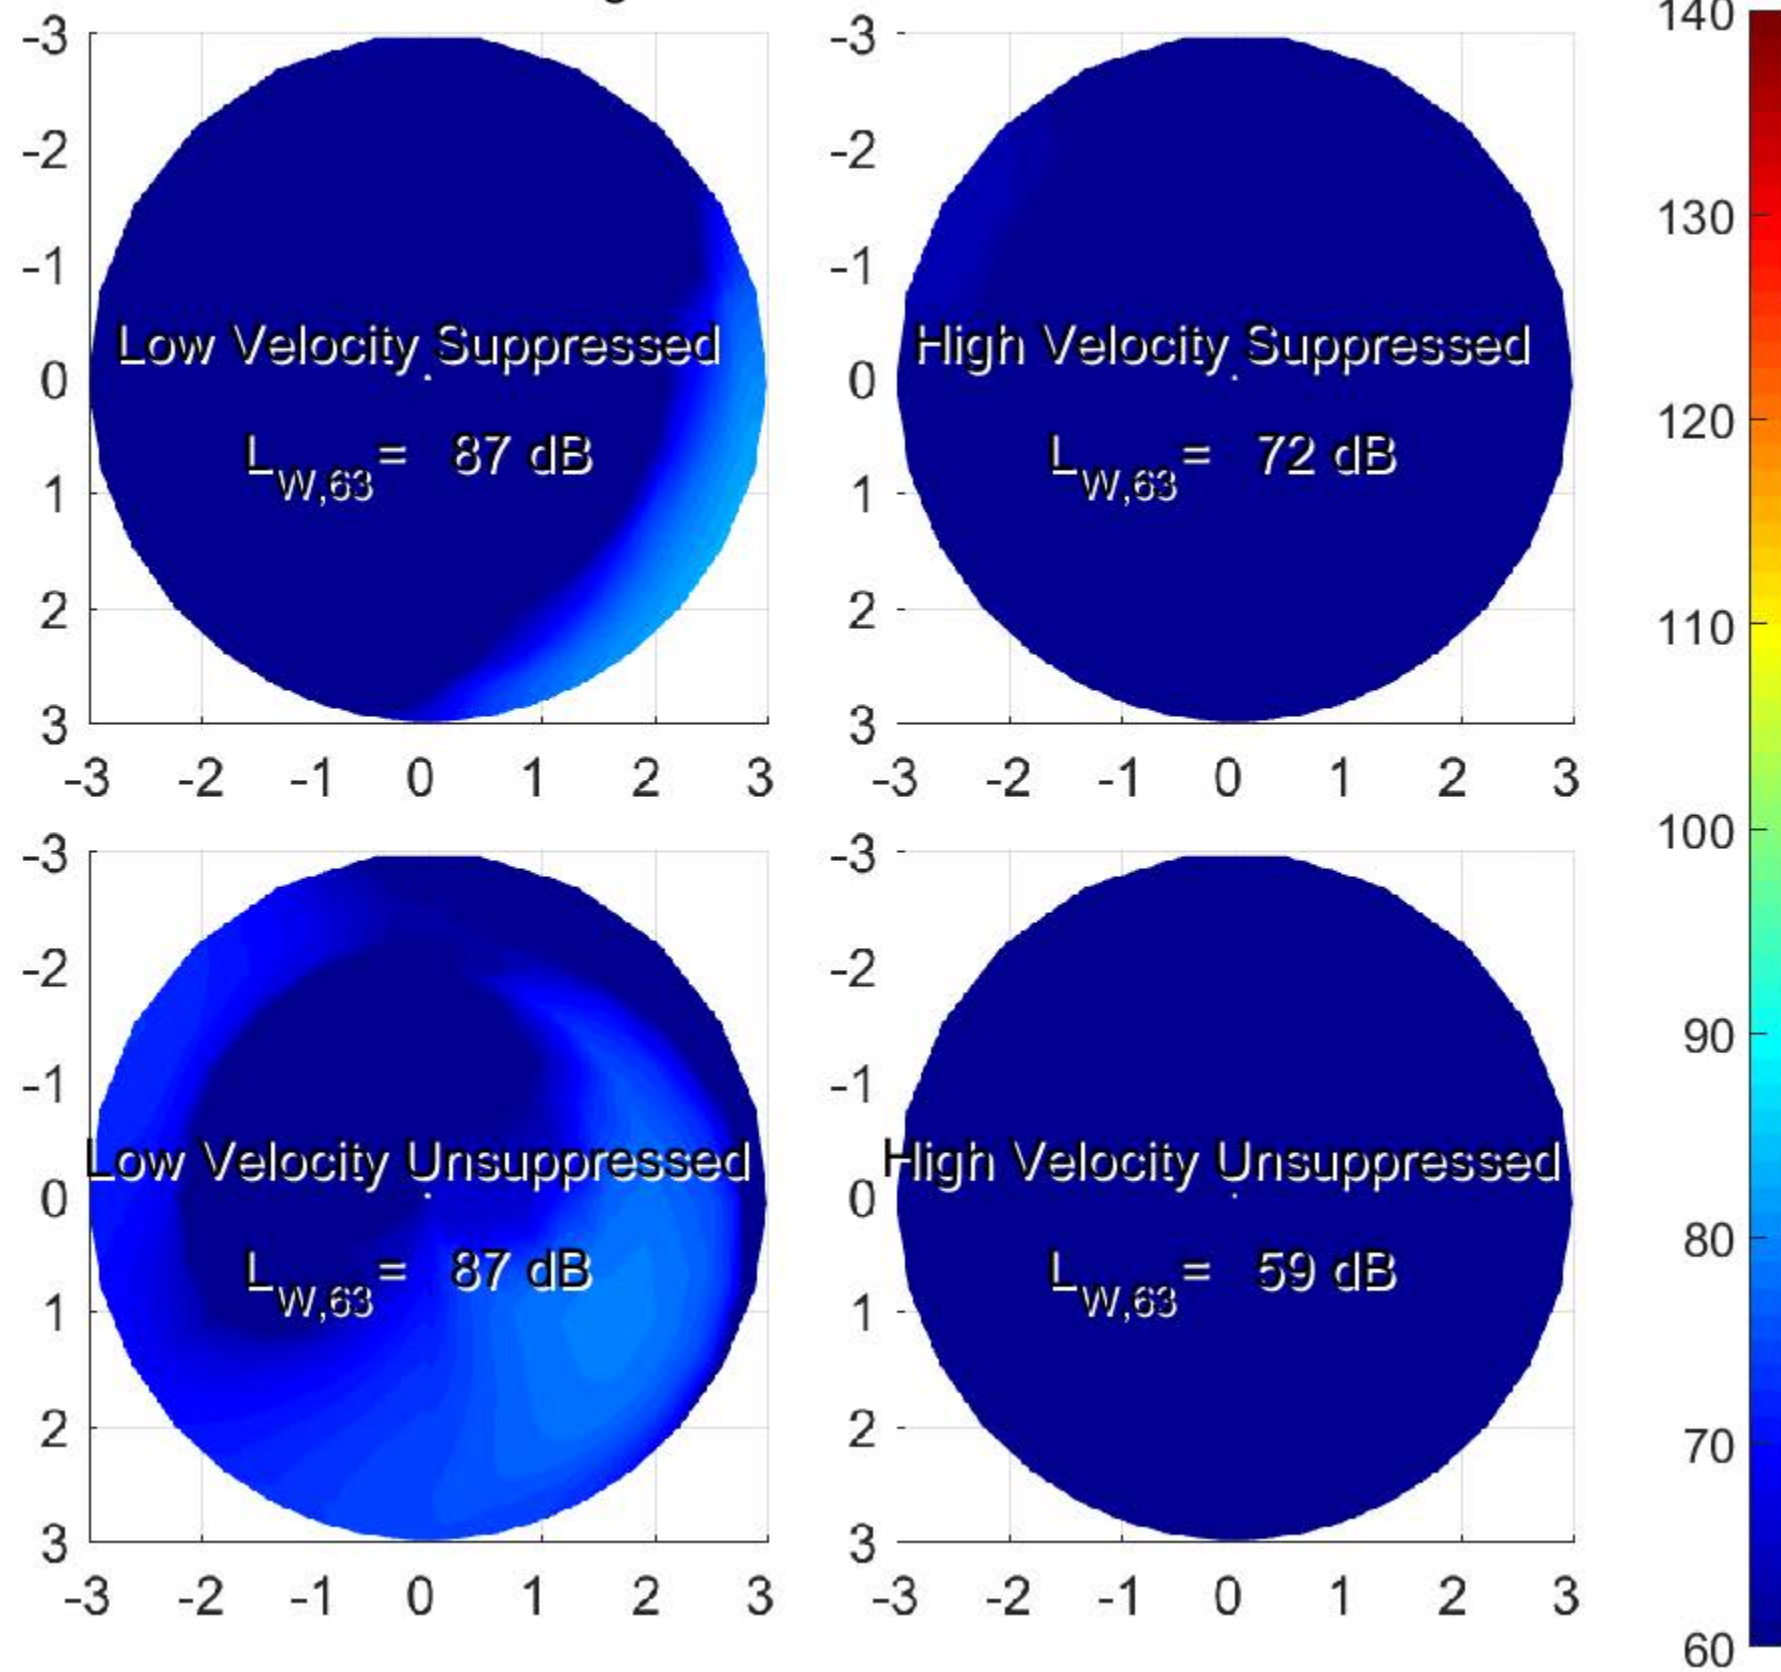

# Savage .22 cal Rifle 80 Hz

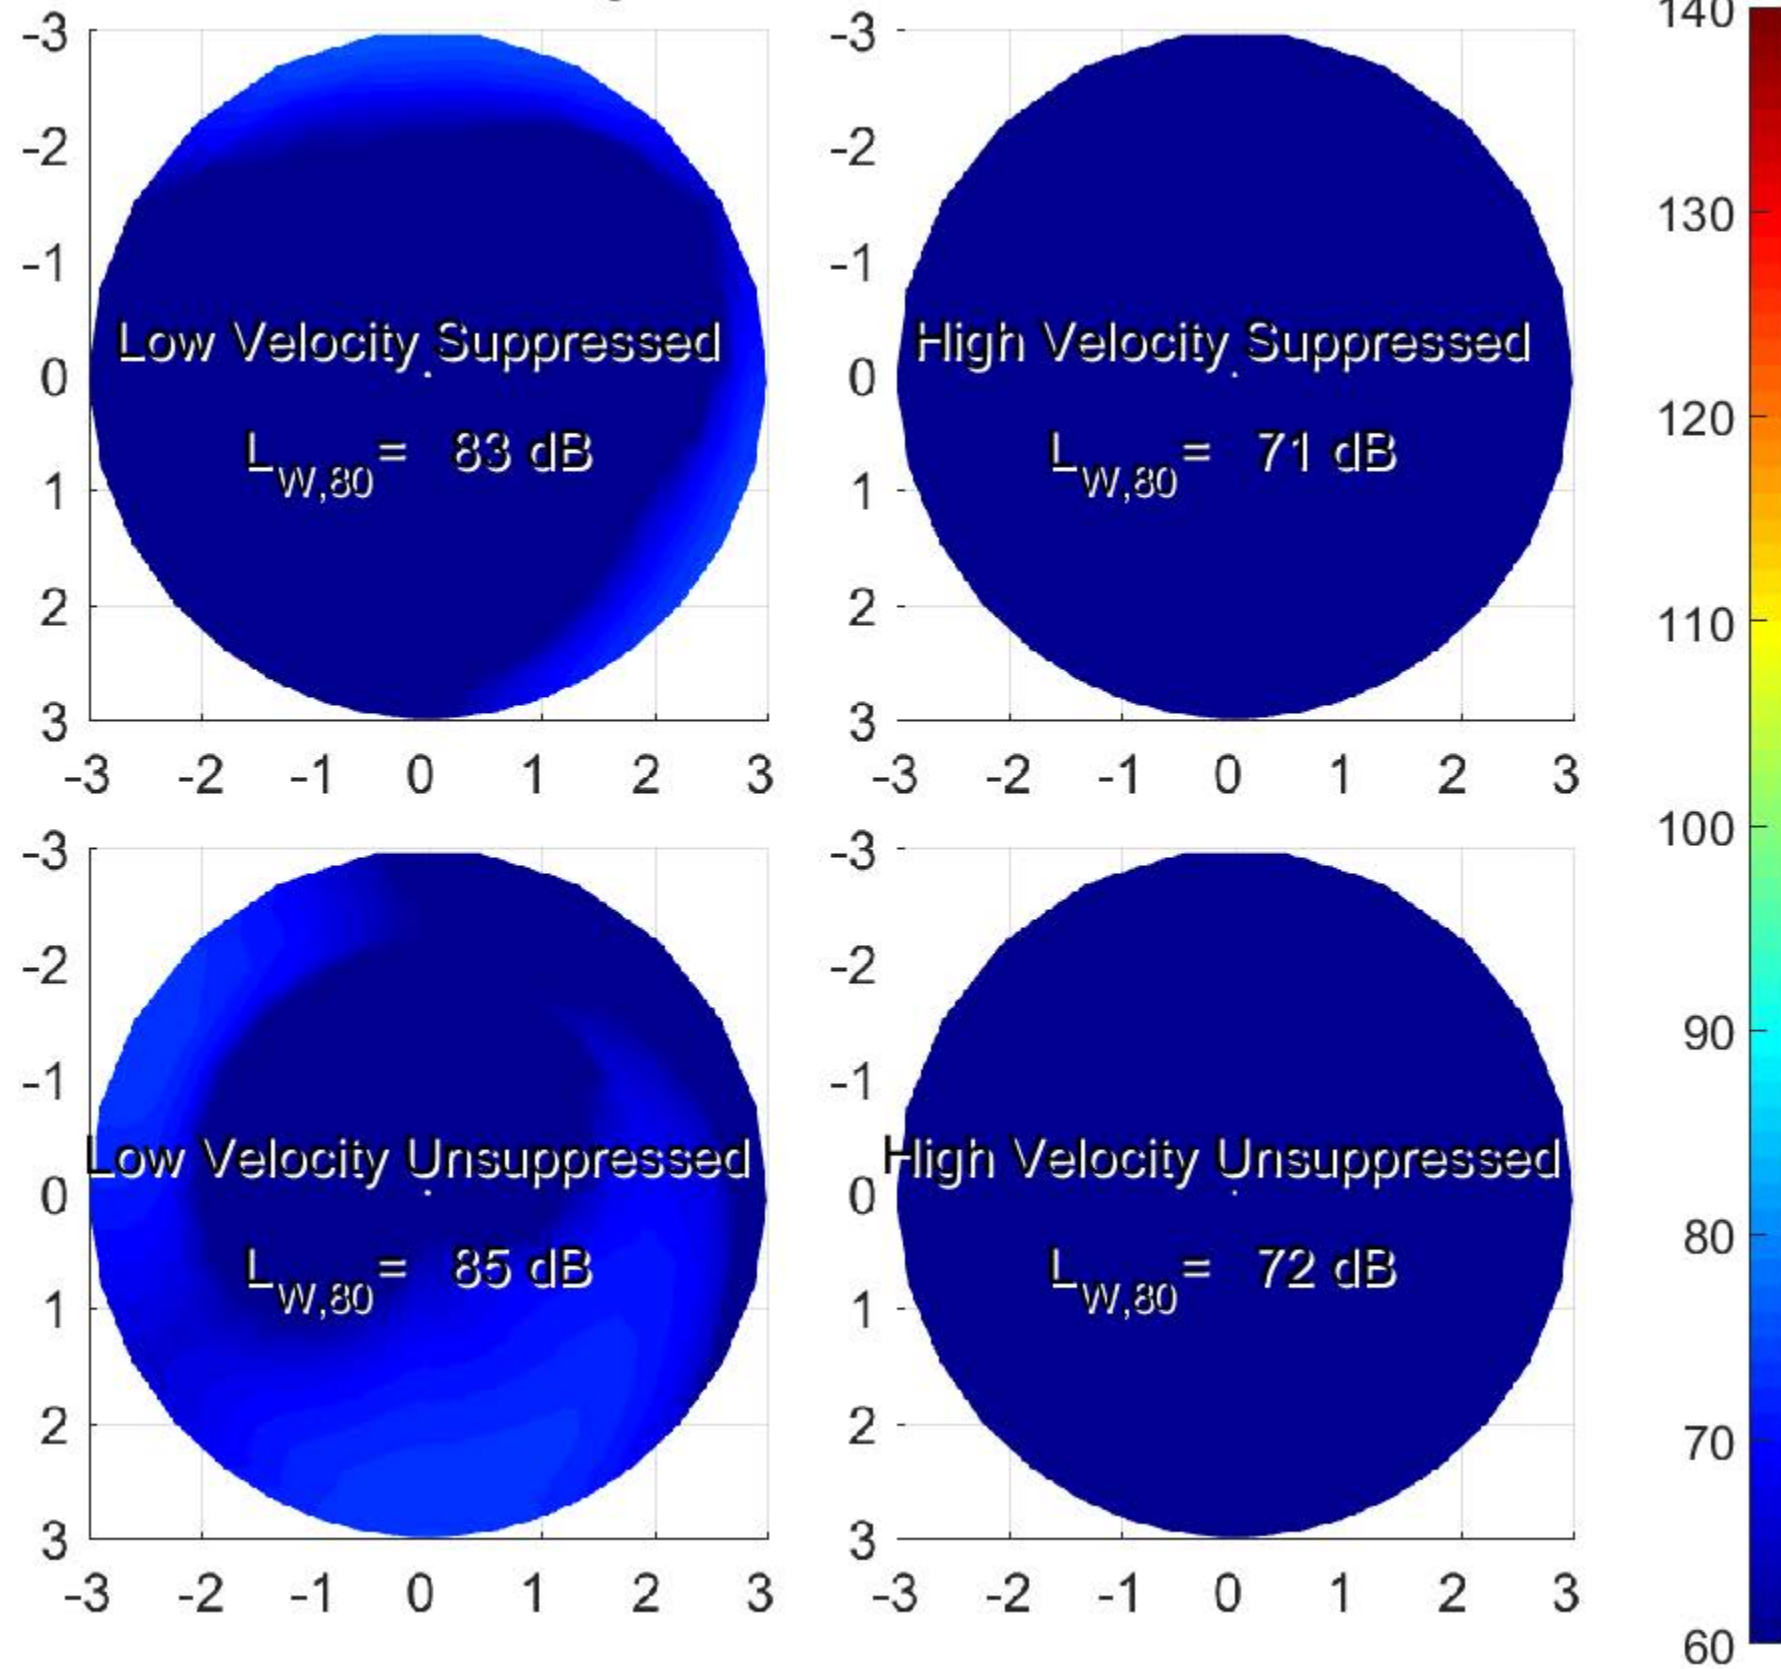

# Savage .22 cal Rifle 100 Hz

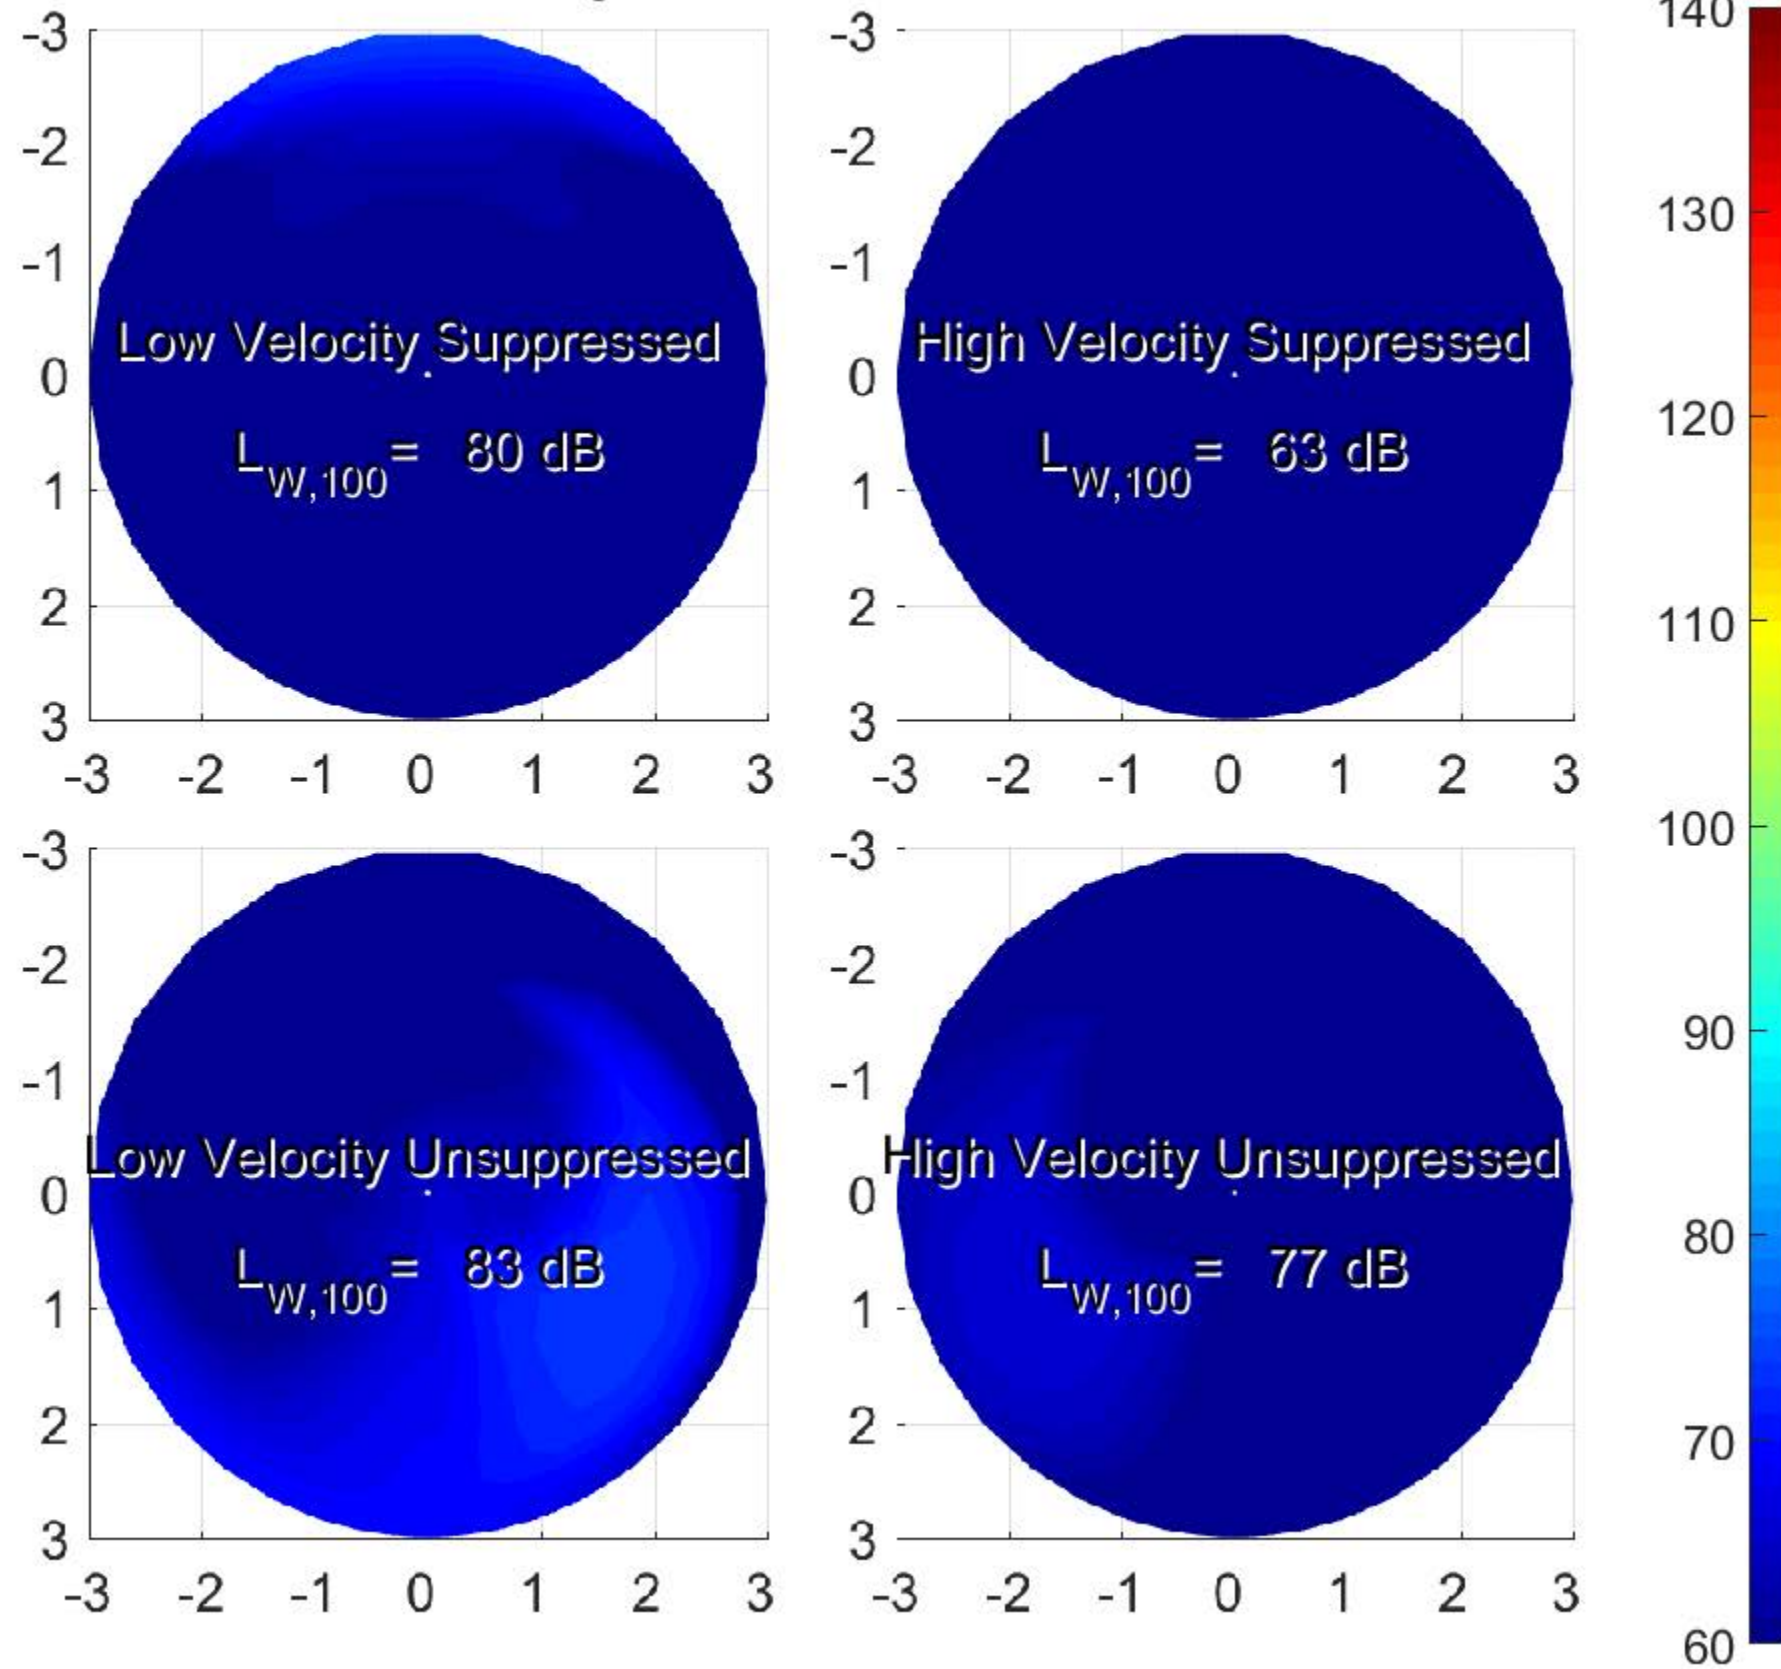

# Savage .22 cal Rifle 125 Hz

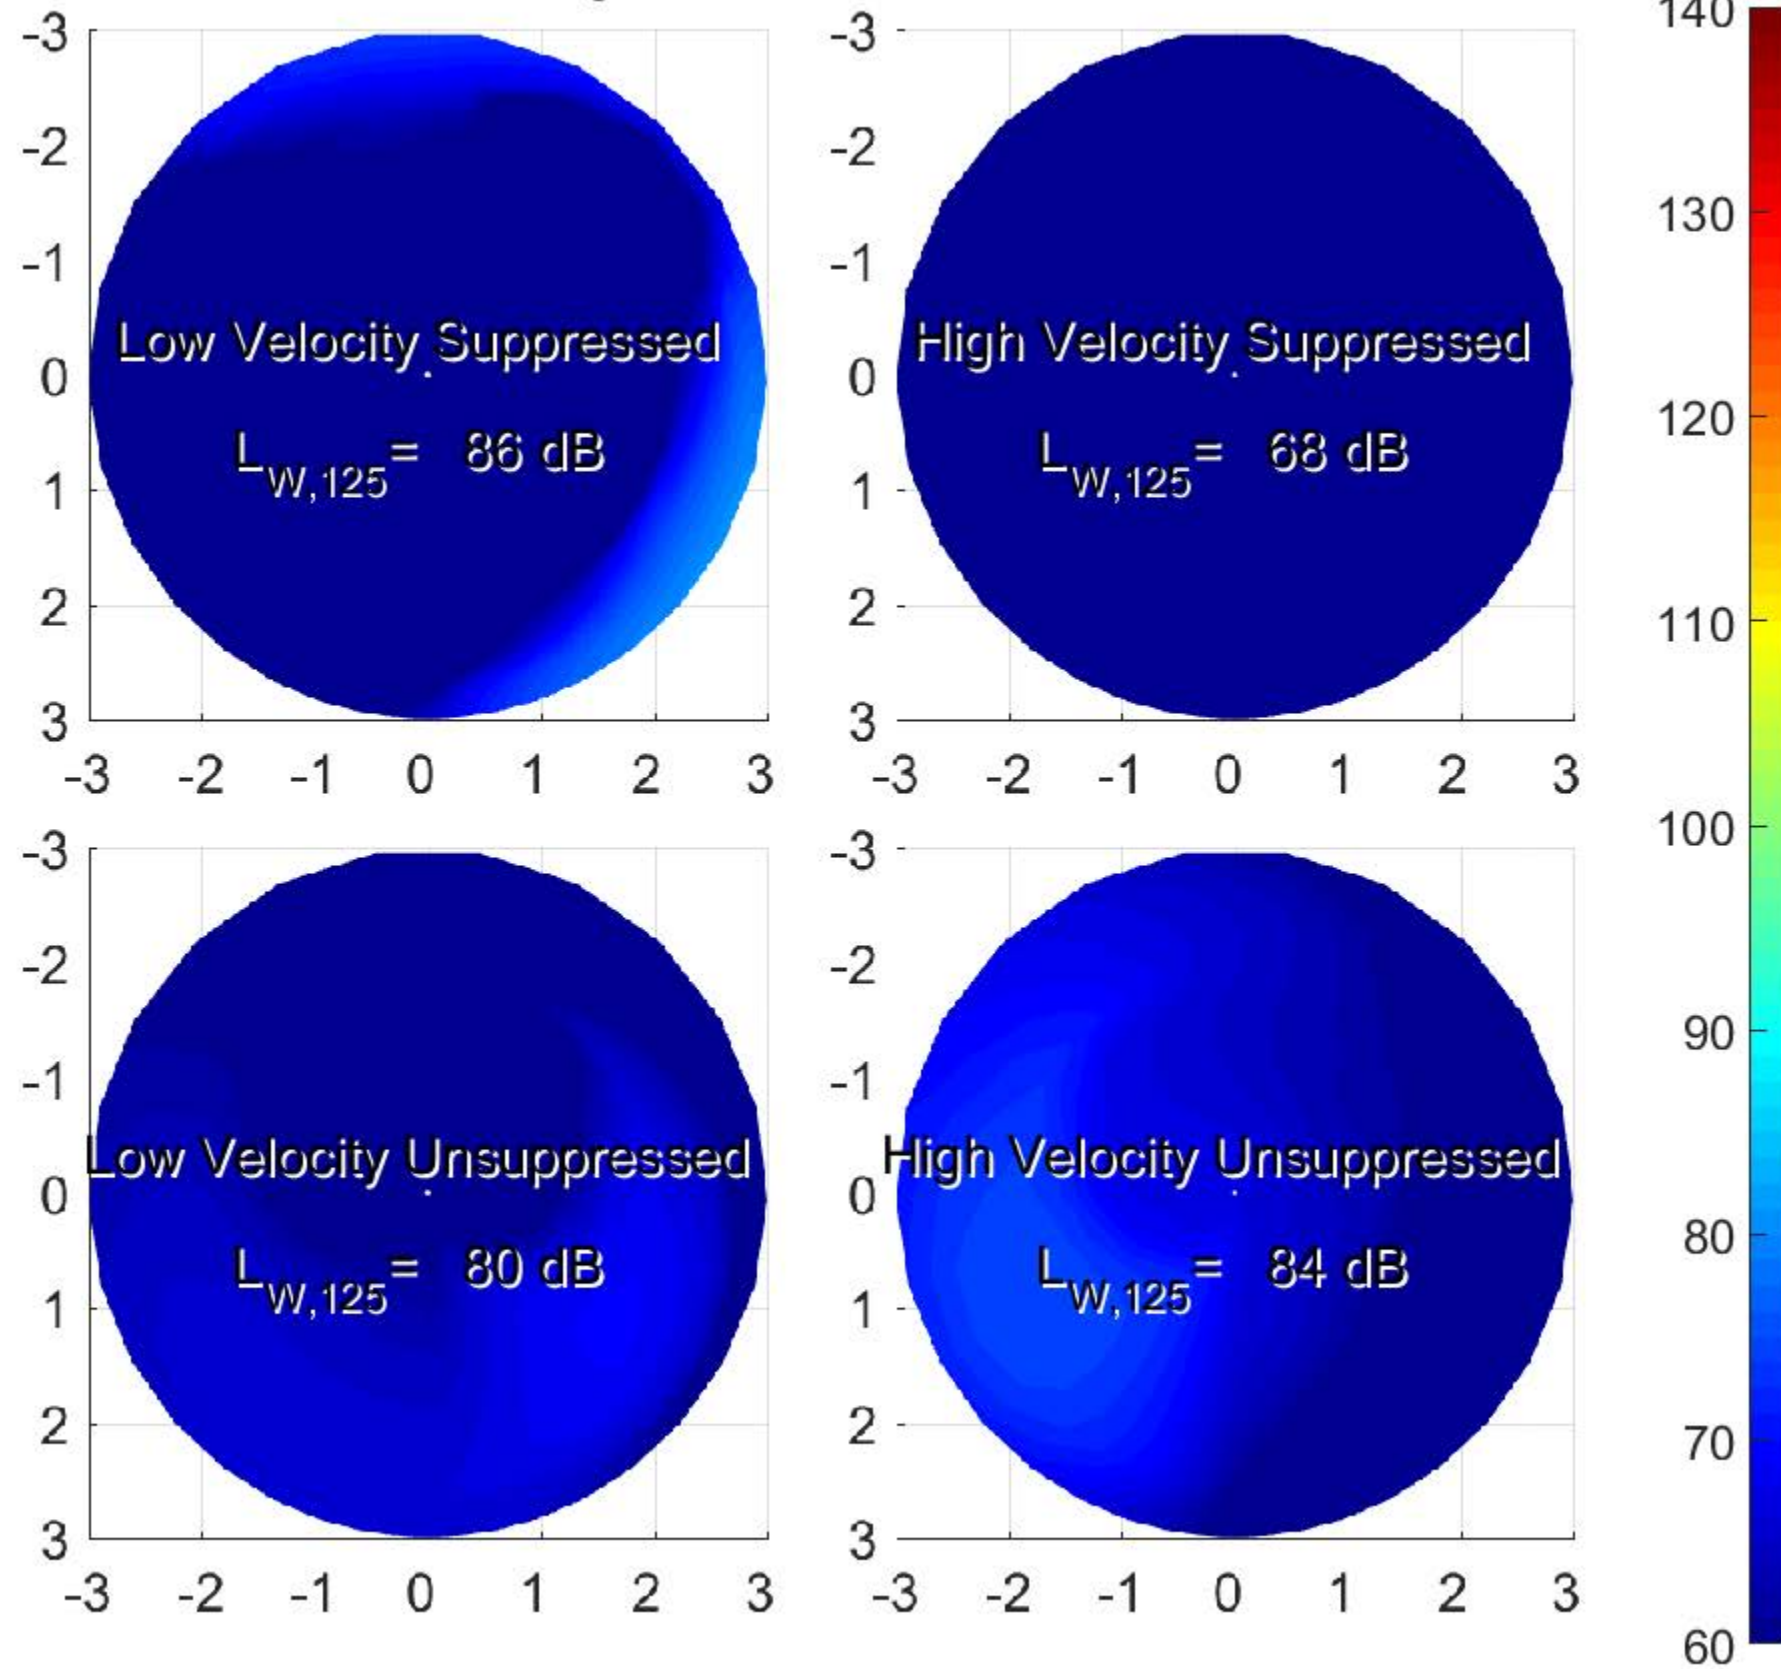

# Savage .22 cal Rifle 160 Hz

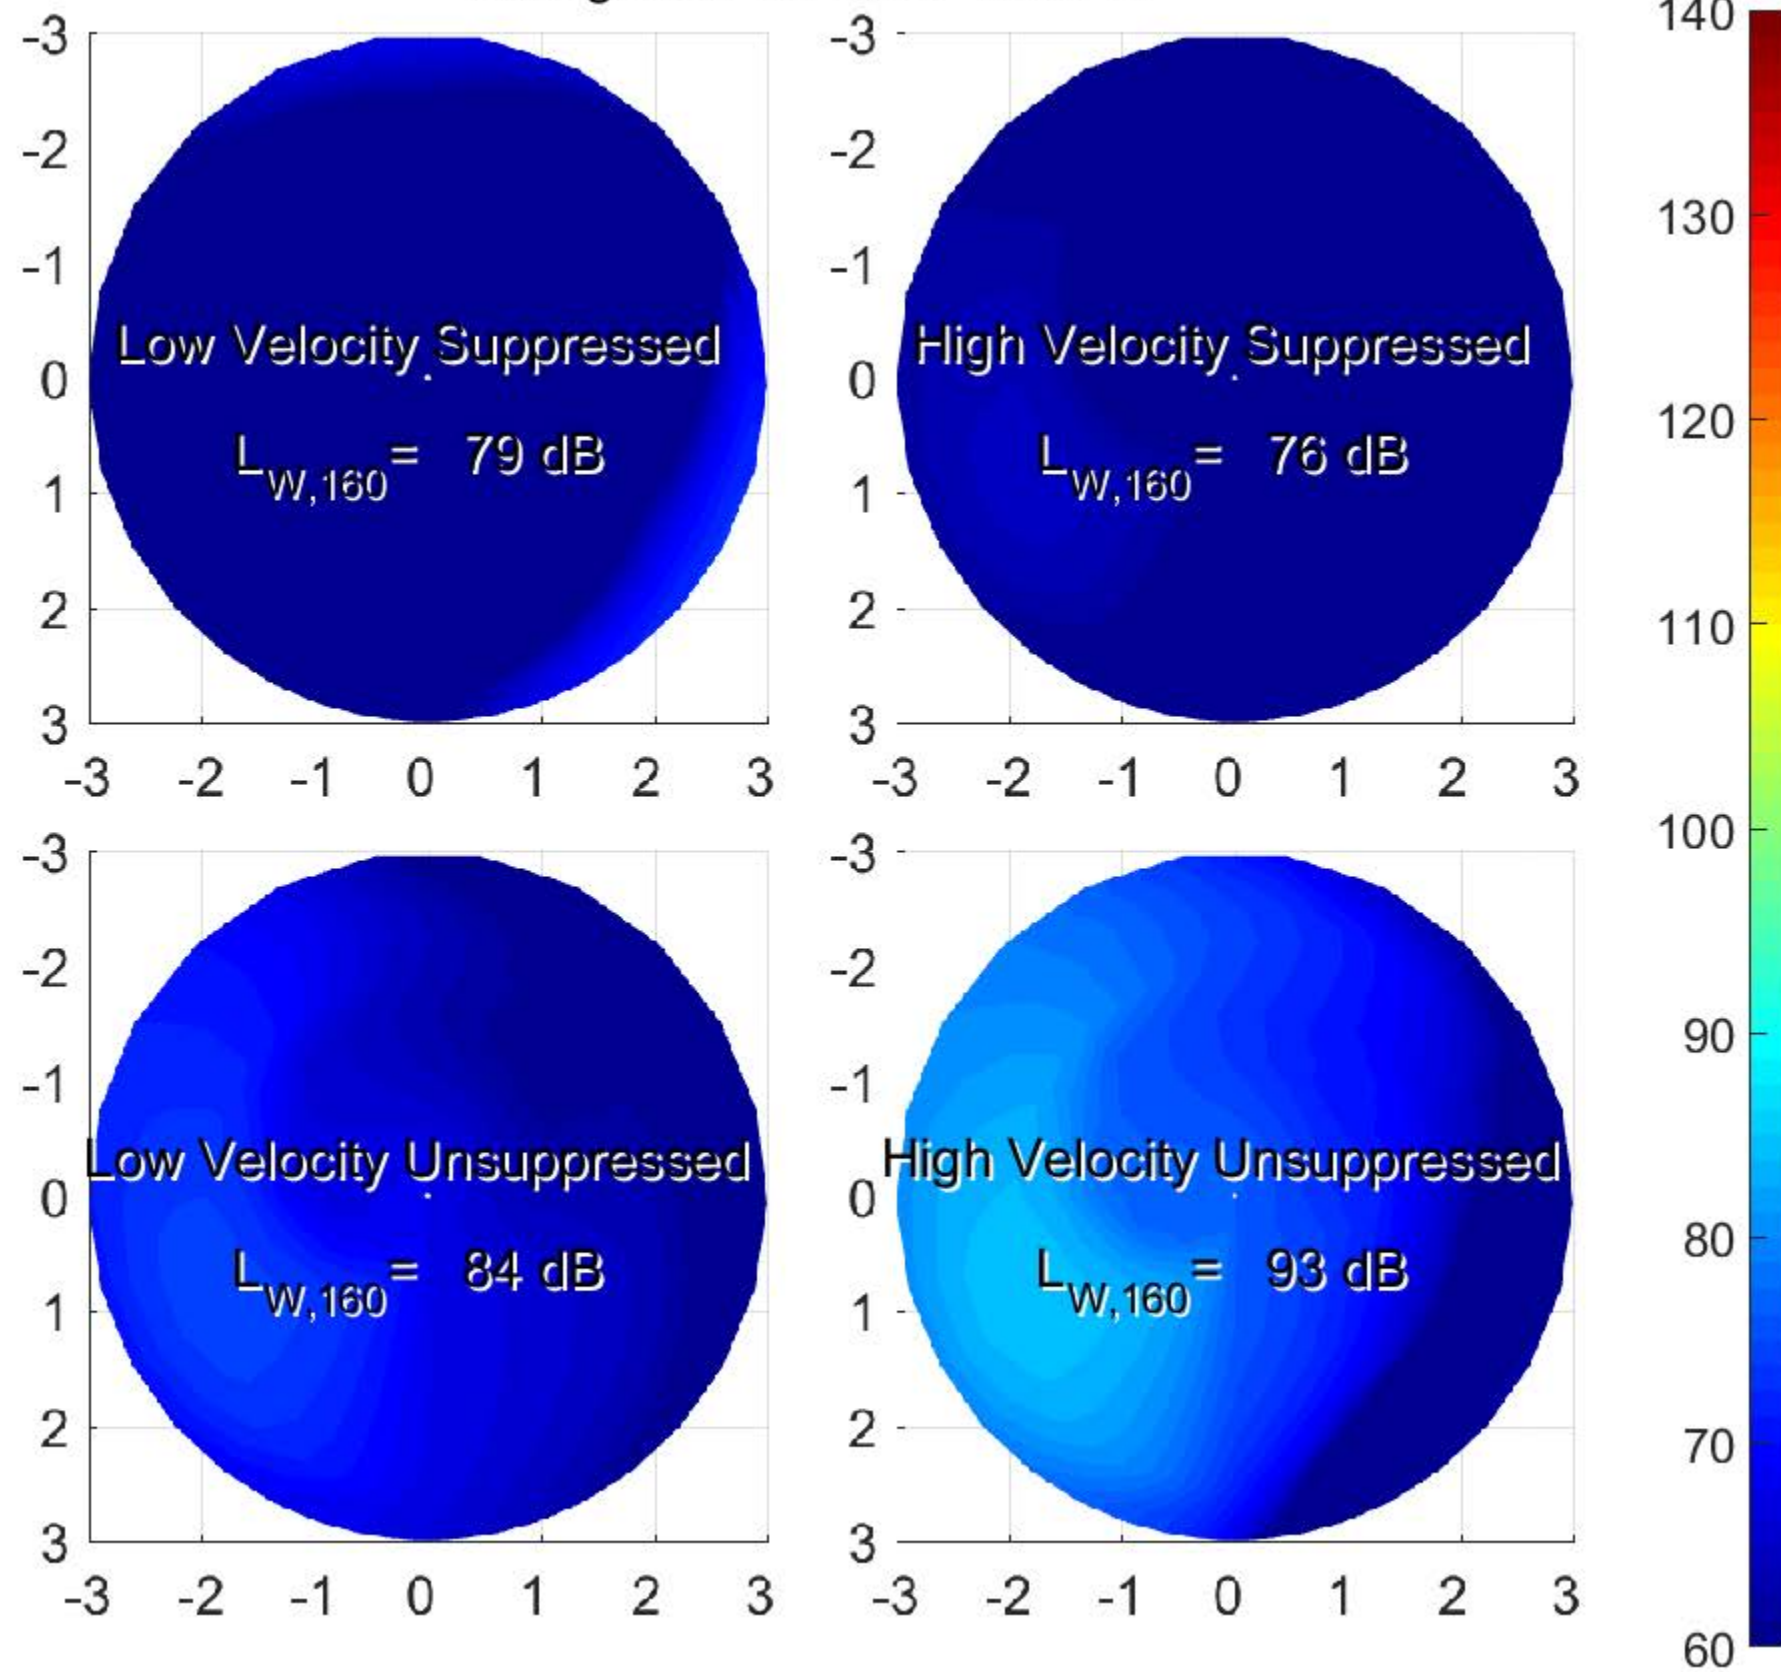

# Savage .22 cal Rifle 200 Hz

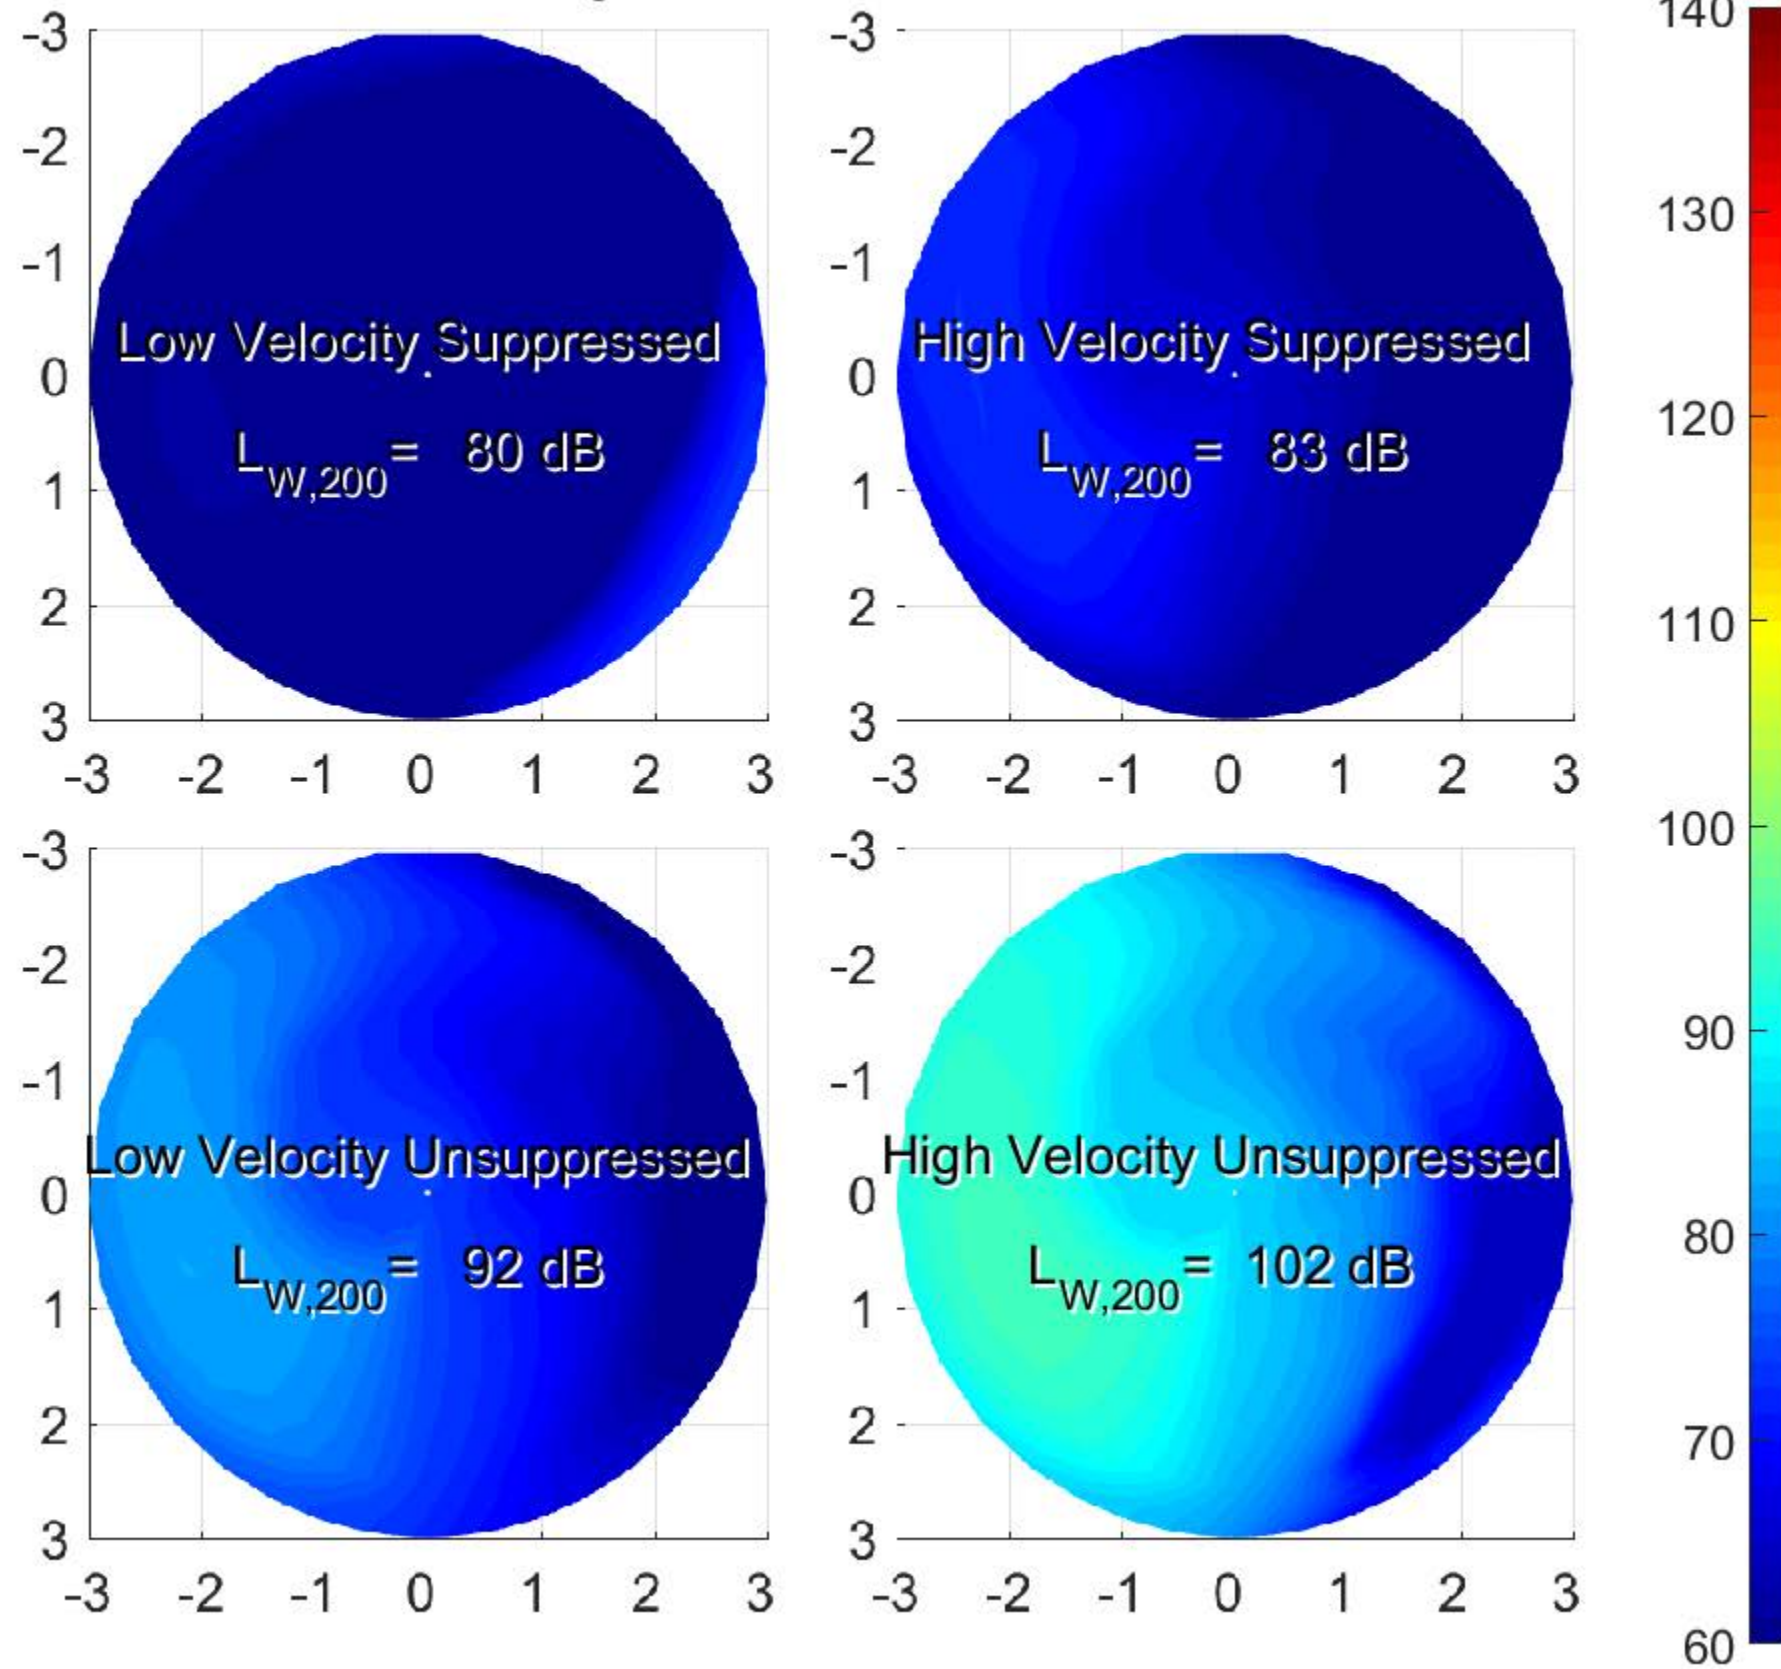

# Savage .22 cal Rifle 250 Hz

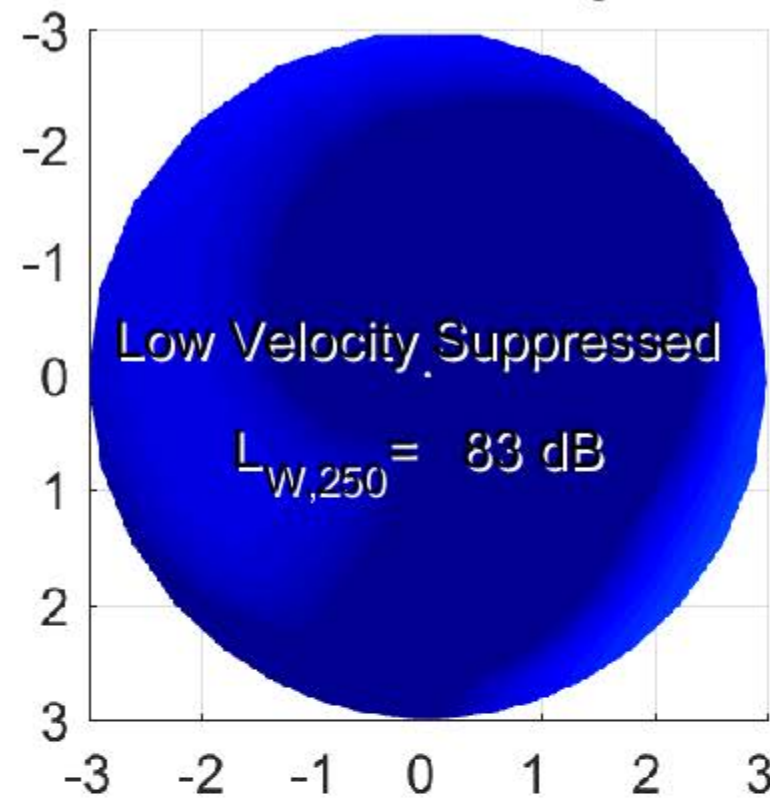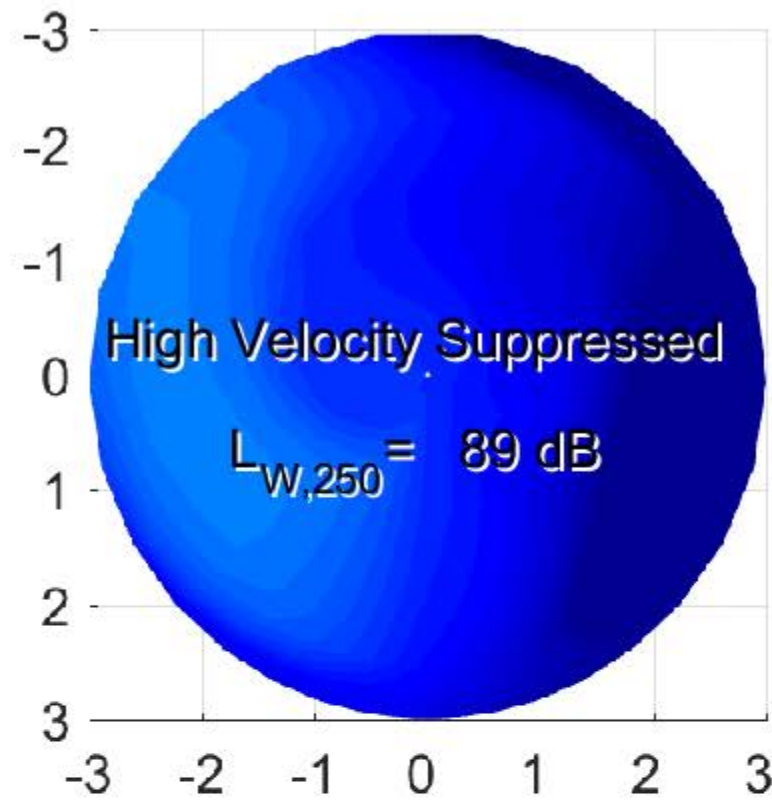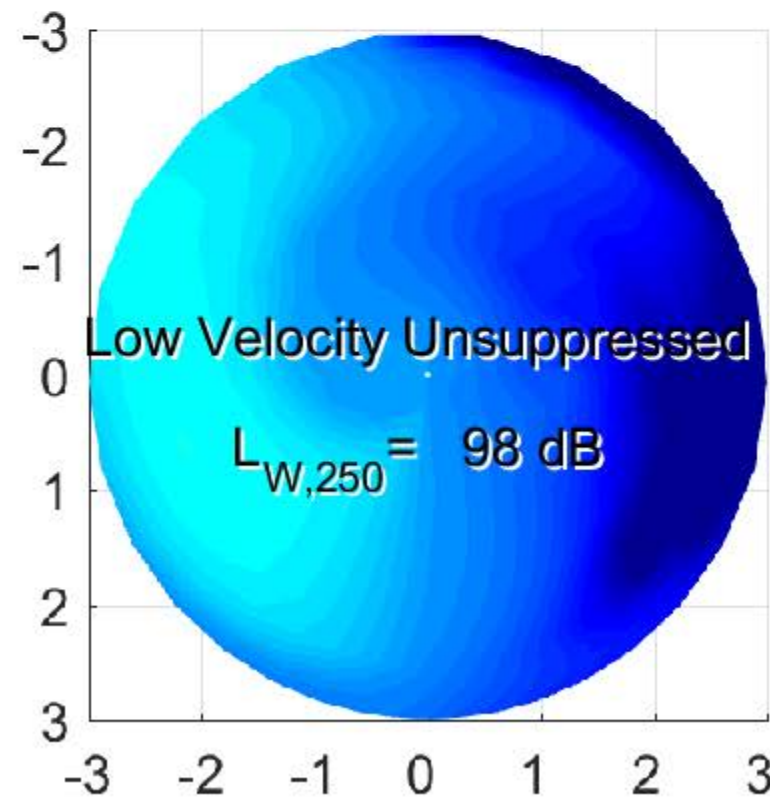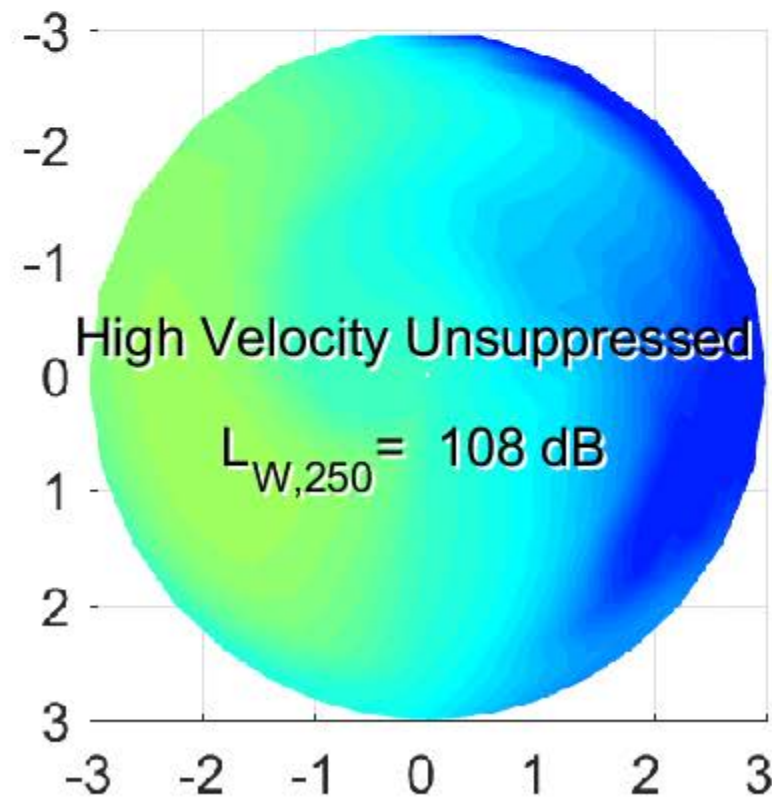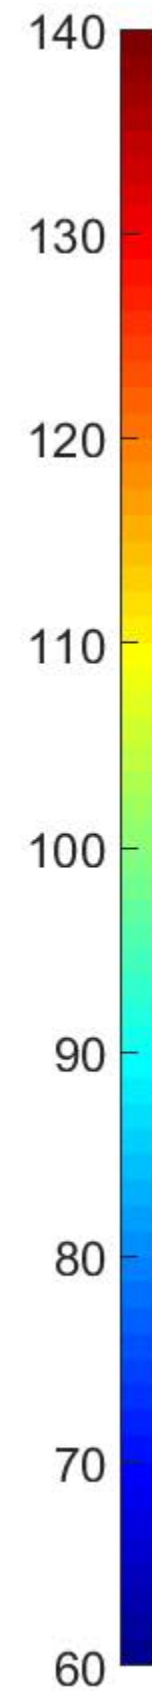

# Savage .22 cal Rifle 315 Hz

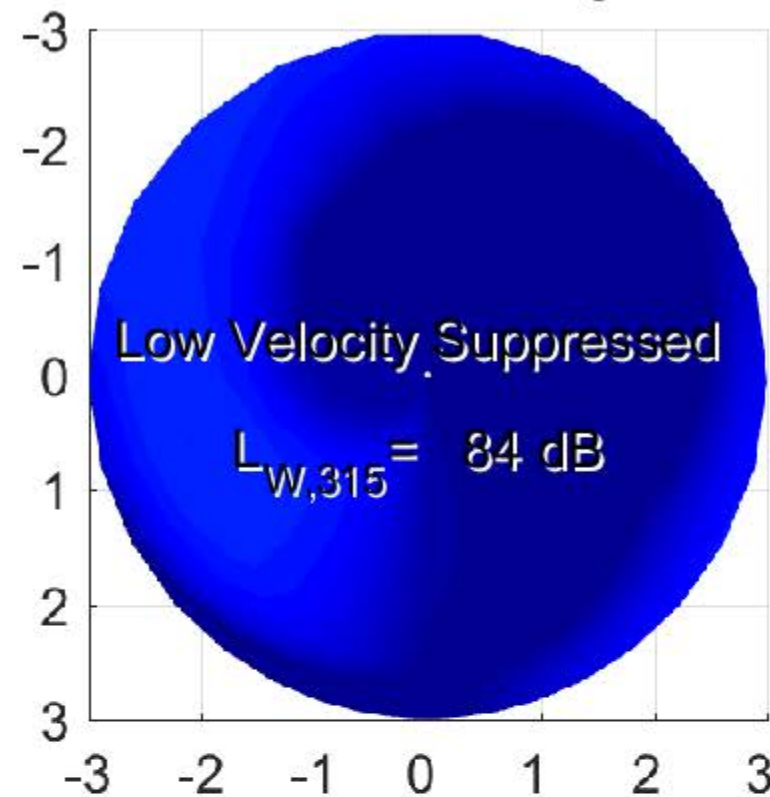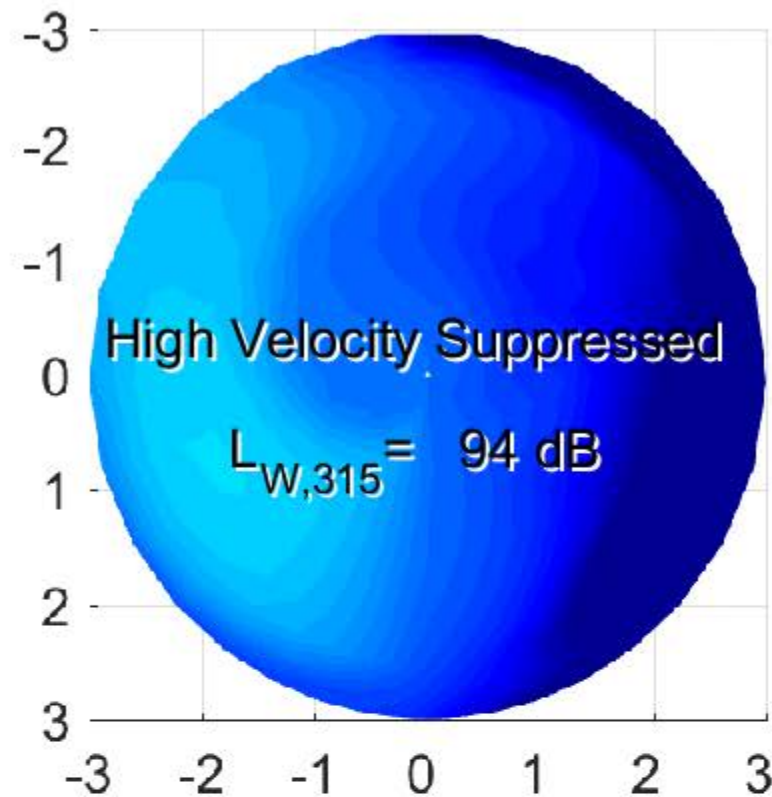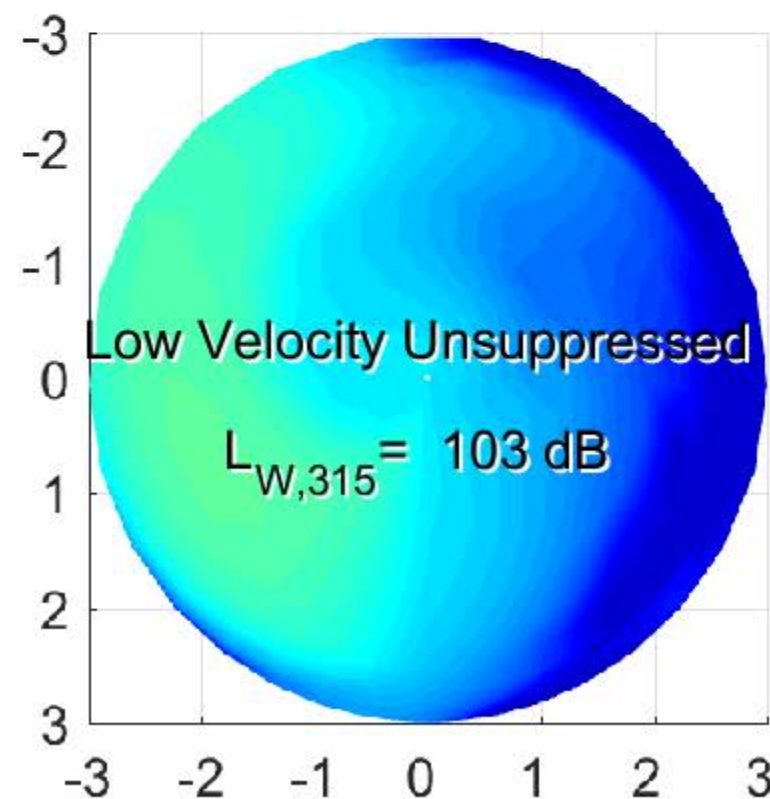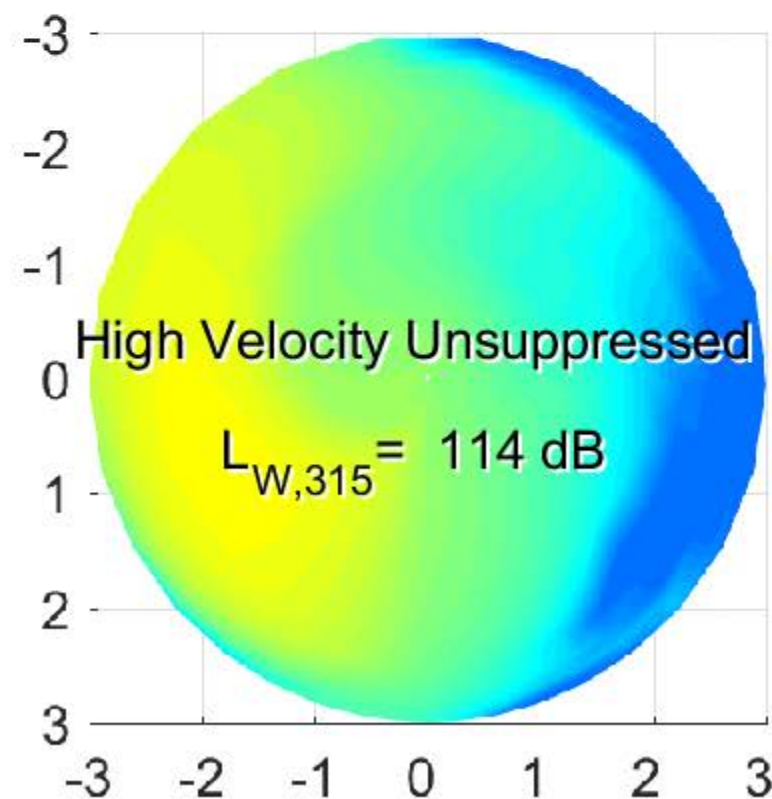

# Savage .22 cal Rifle 400 Hz

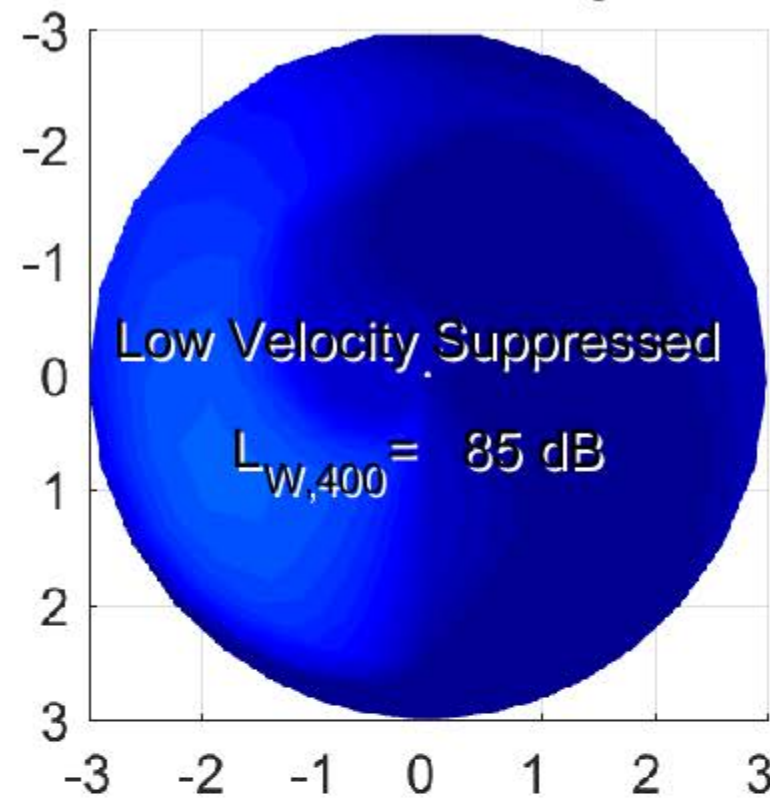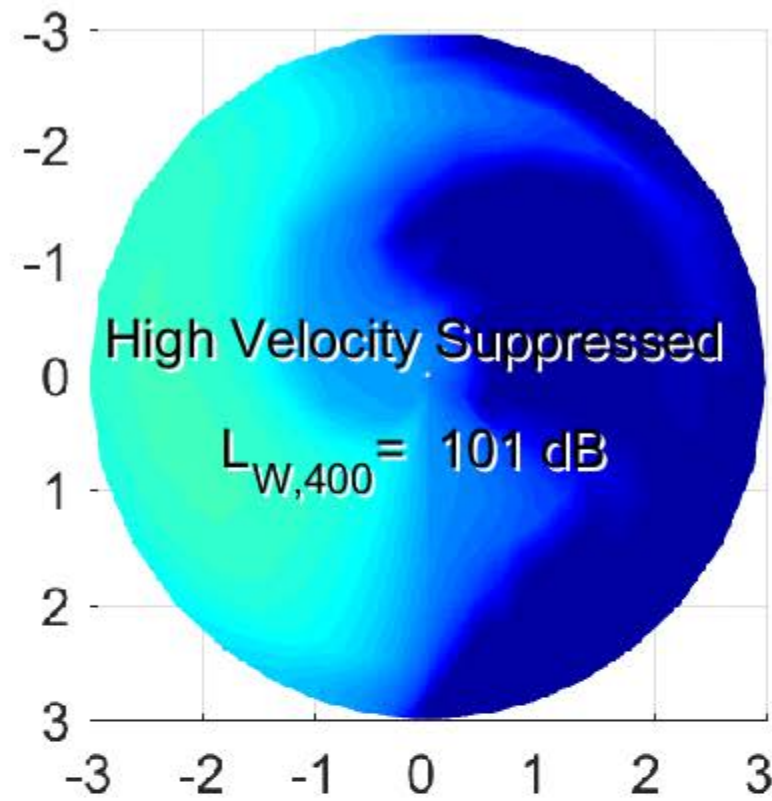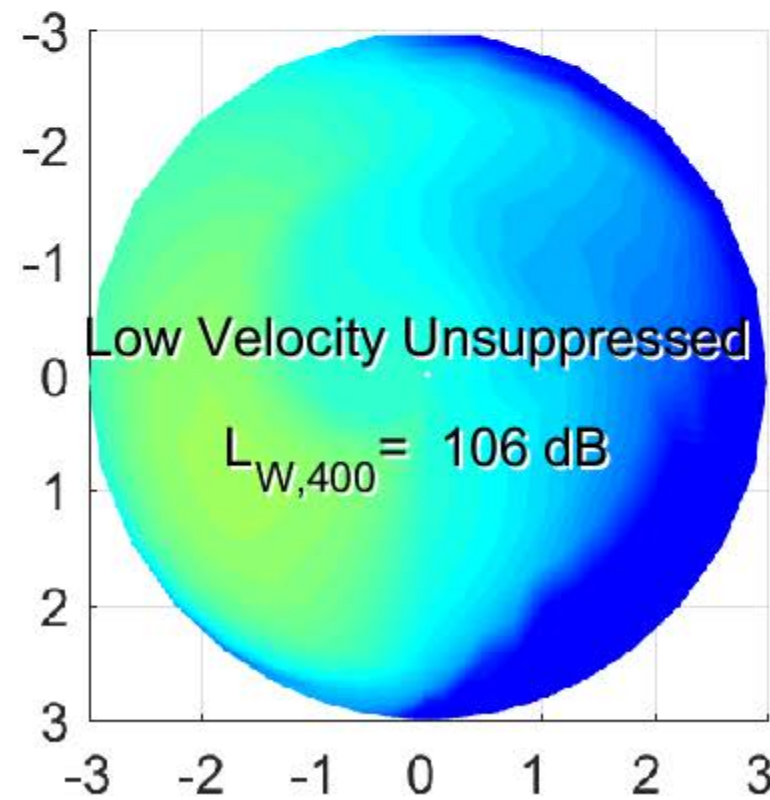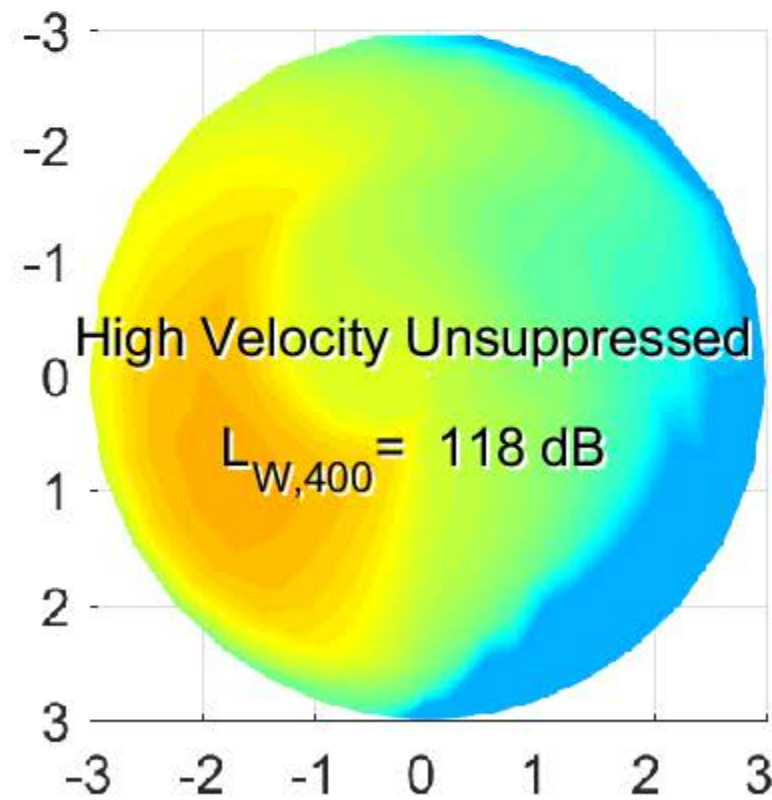

# Savage .22 cal Rifle 500 Hz

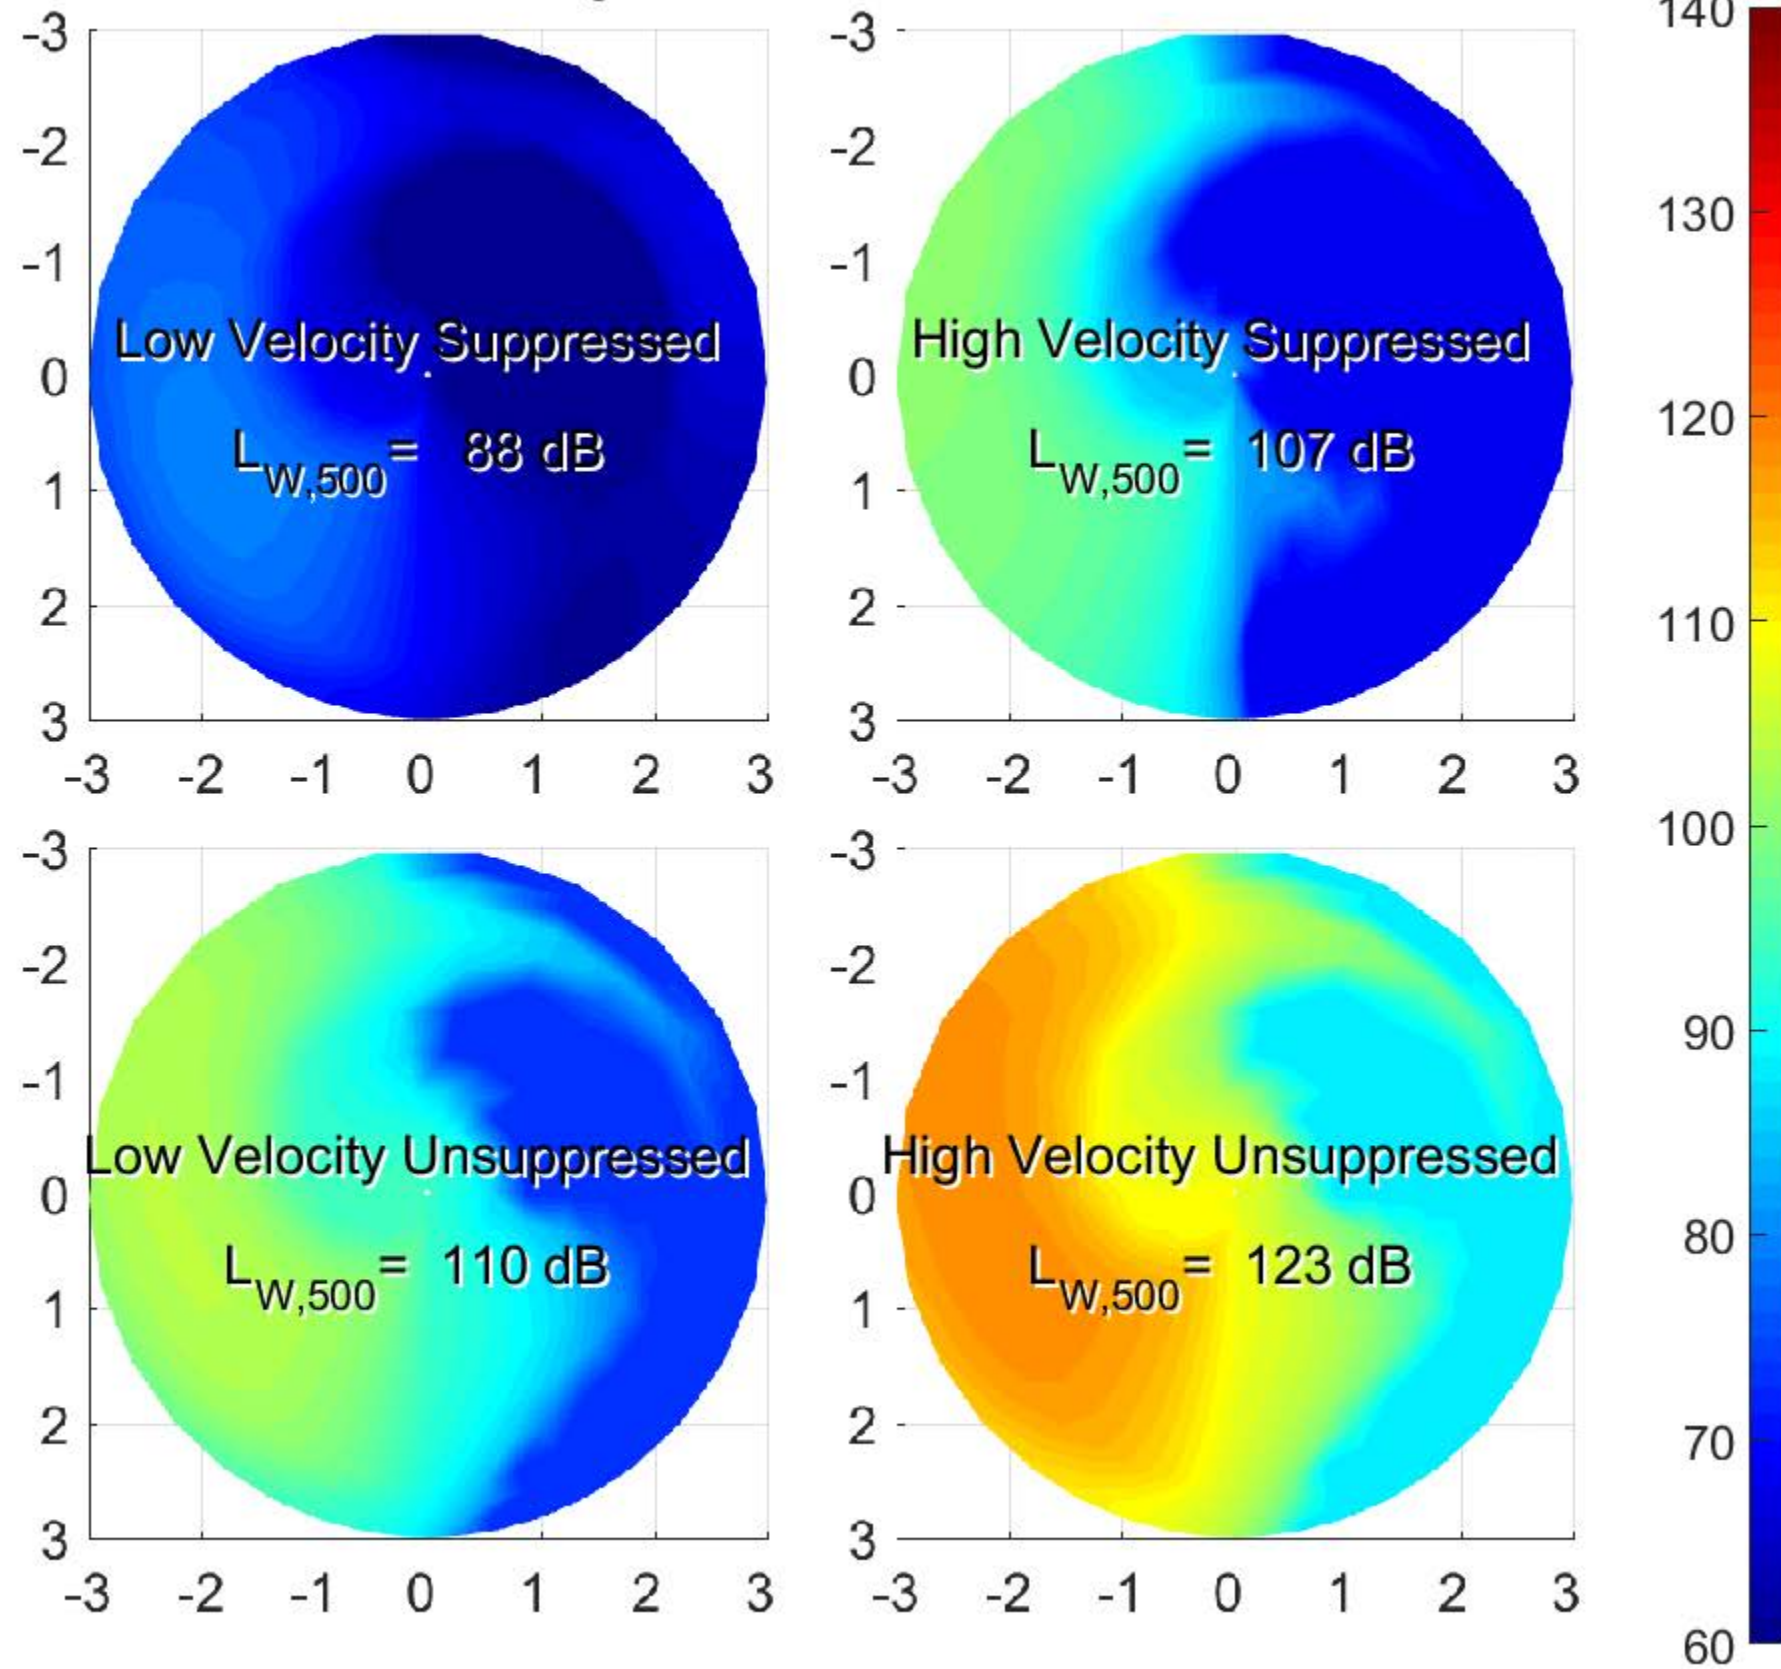

# Savage .22 cal Rifle 630 Hz

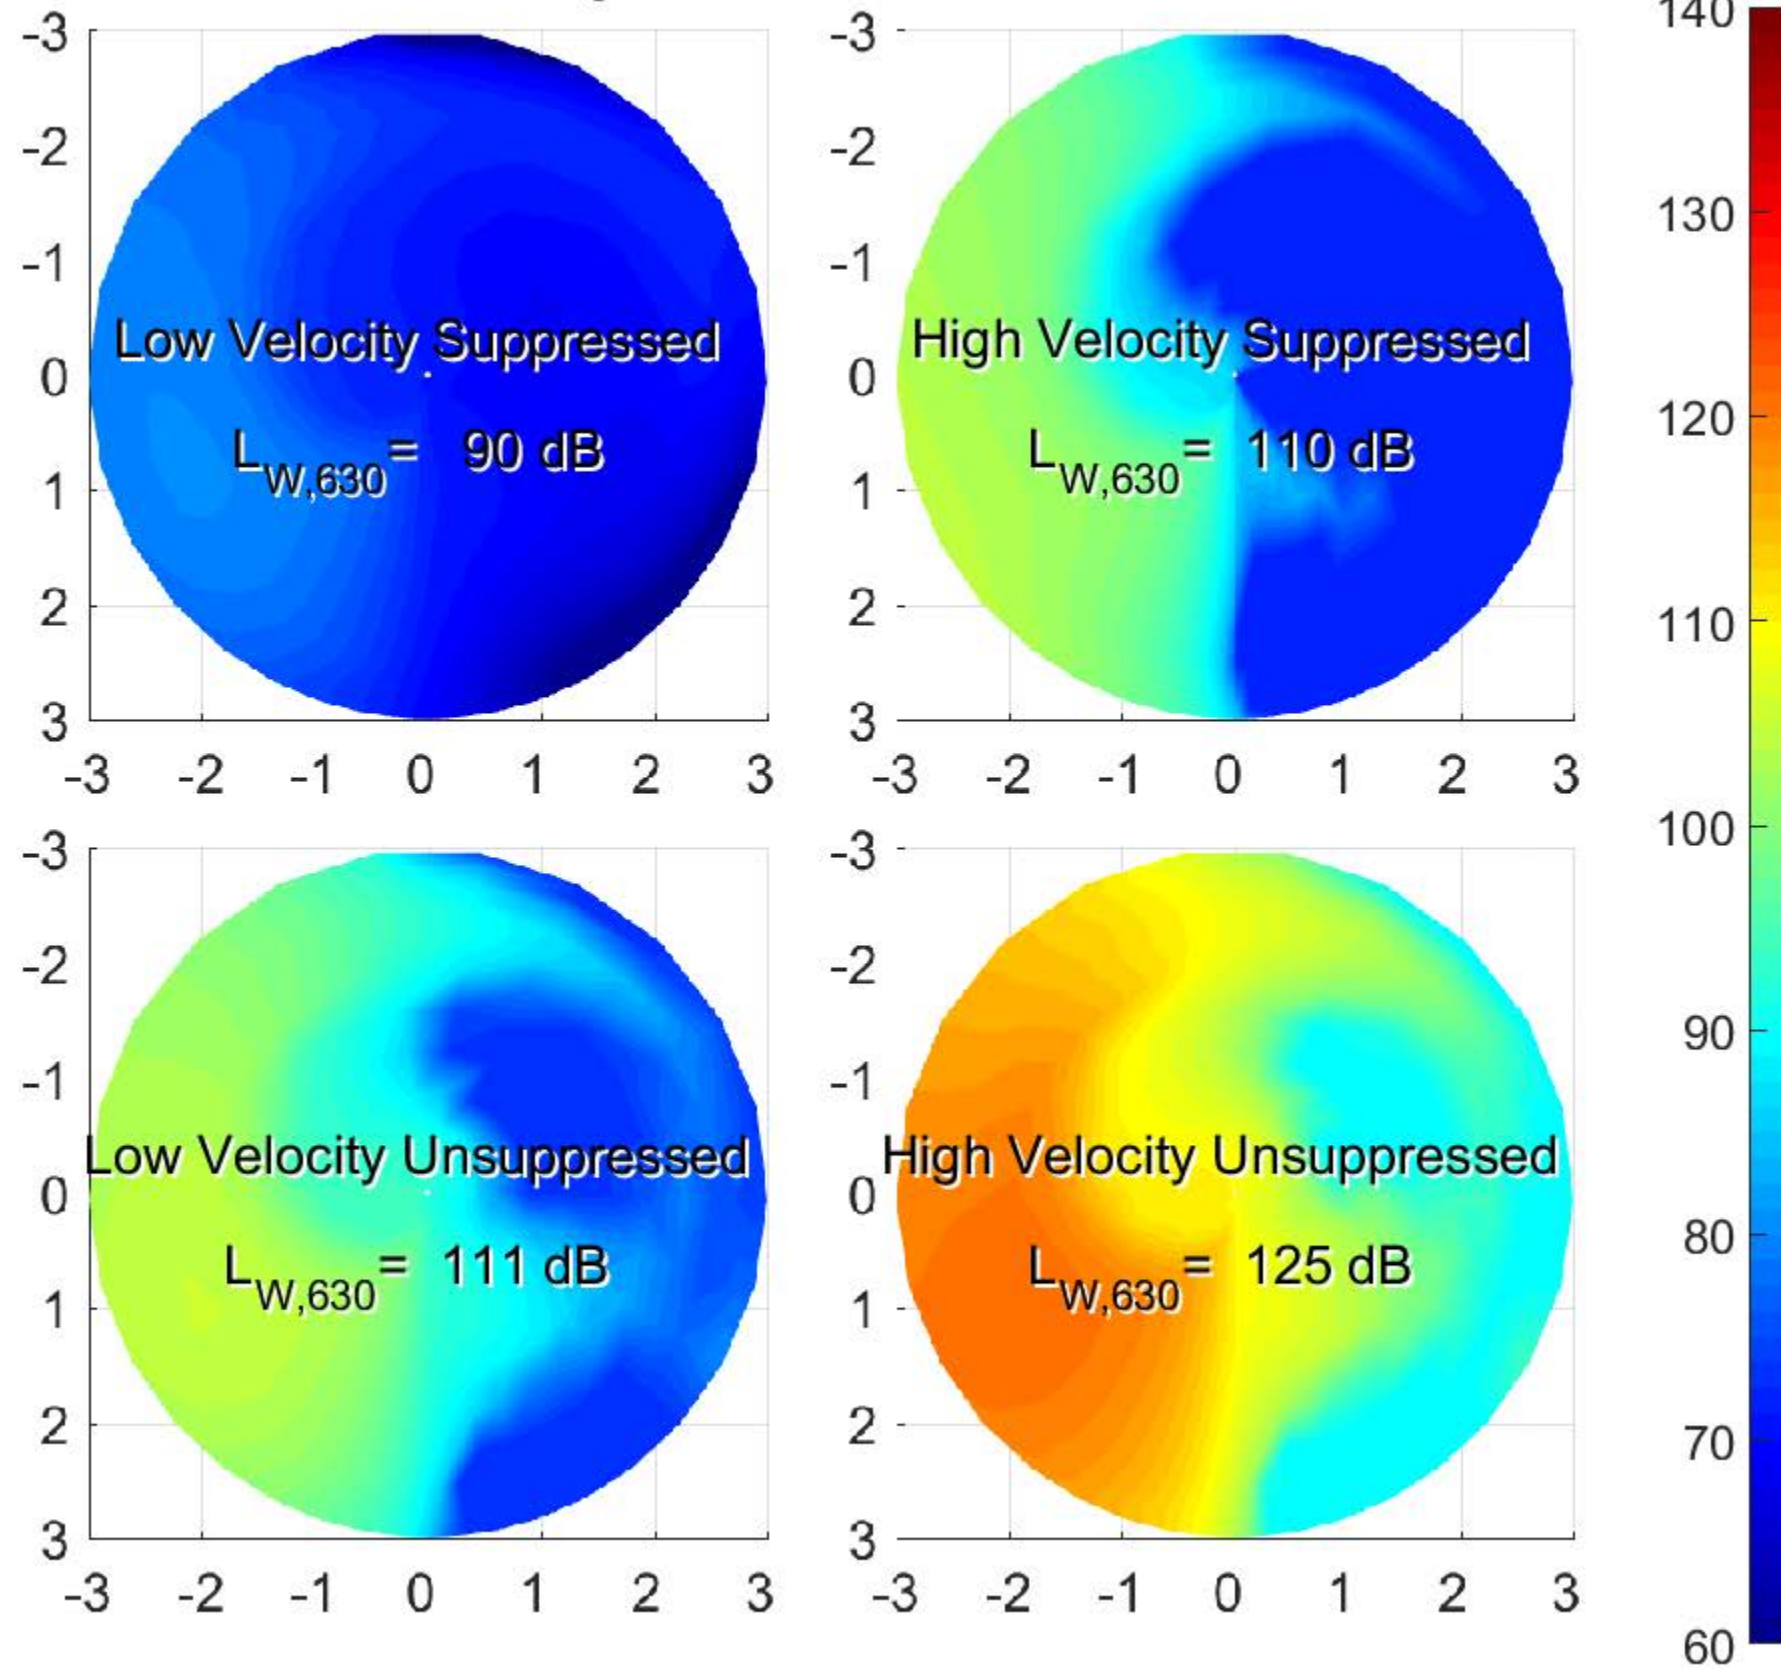

# Savage .22 cal Rifle 800 Hz

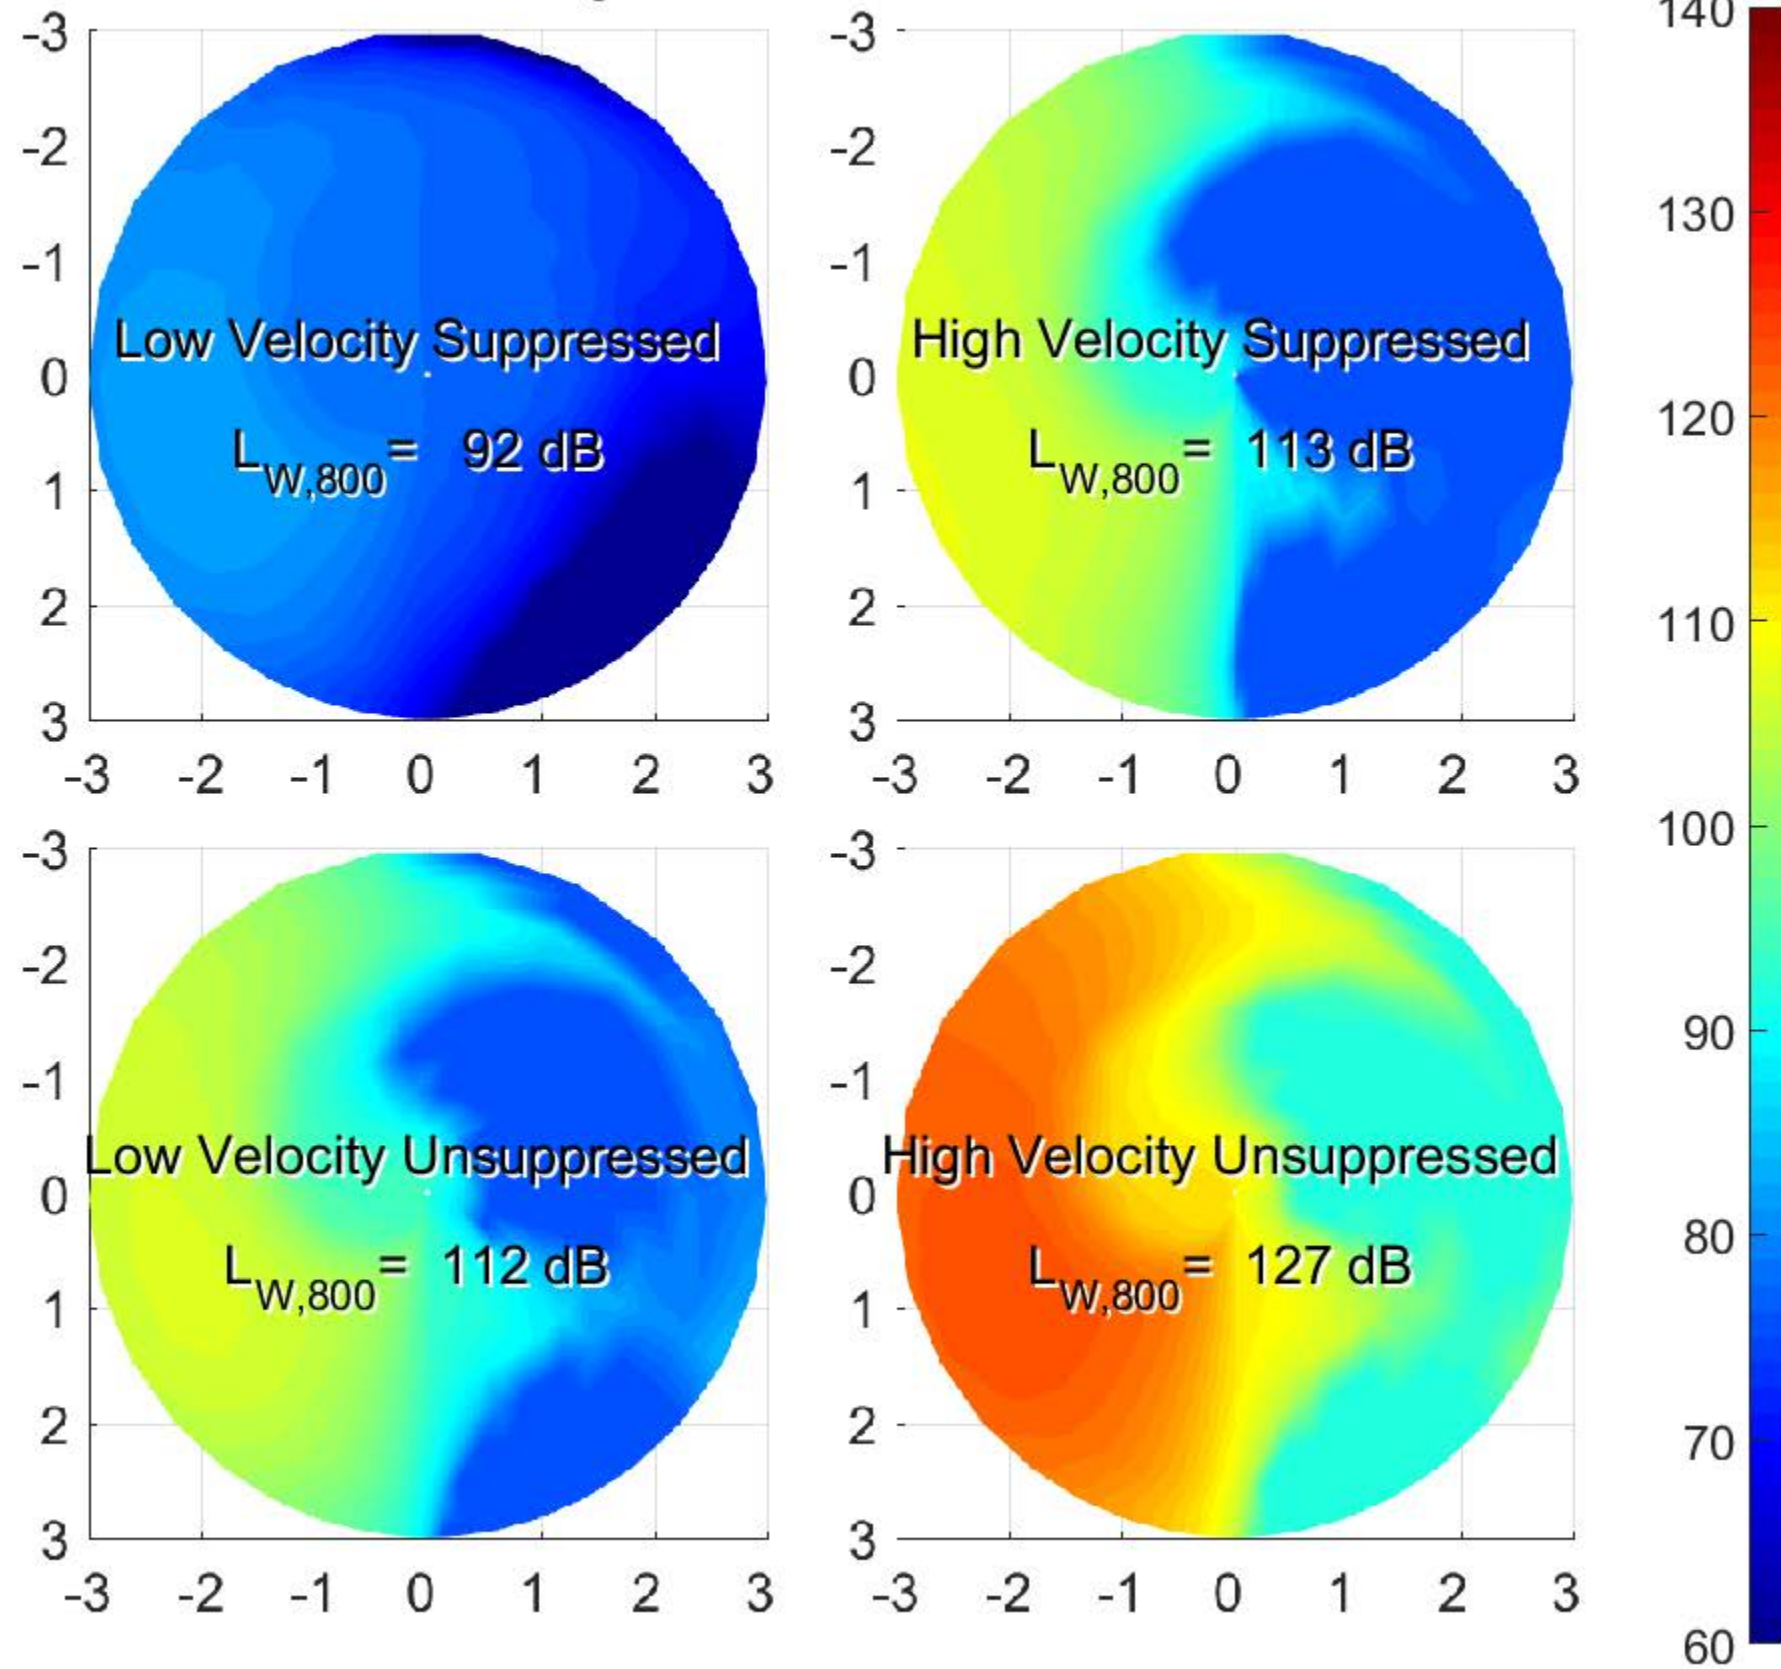

# Savage .22 cal Rifle 1000 Hz

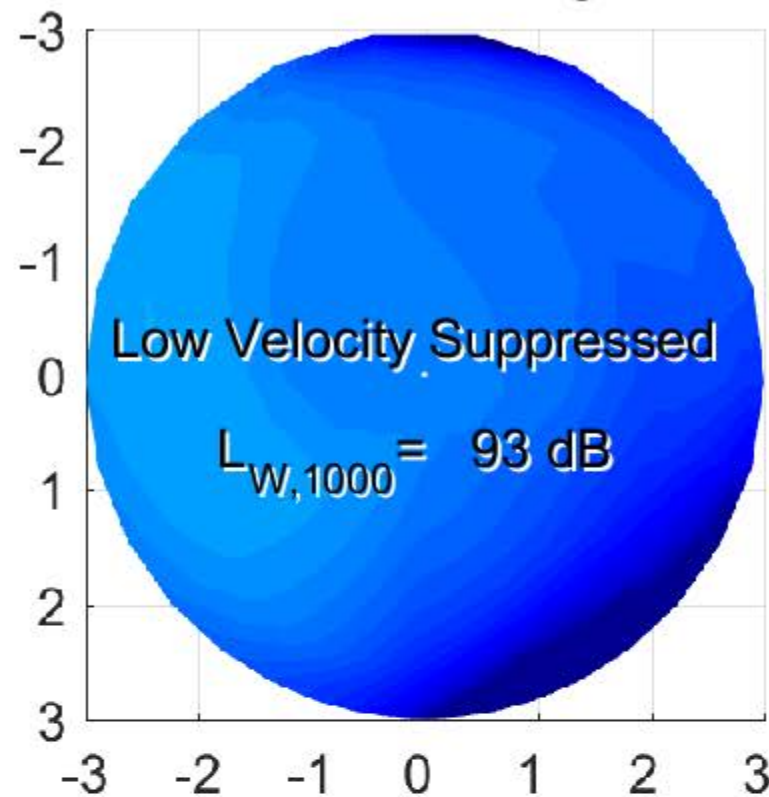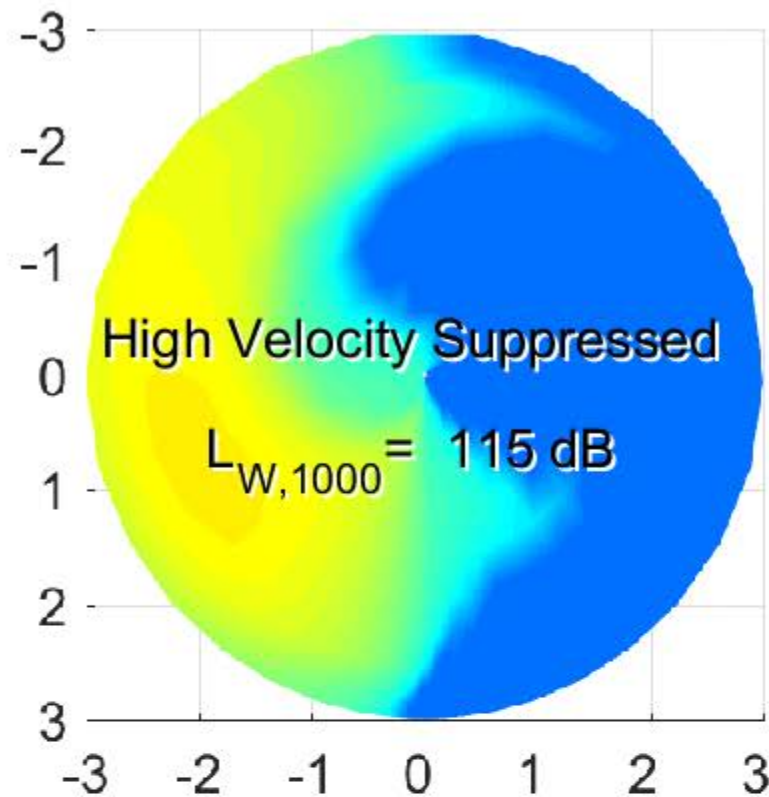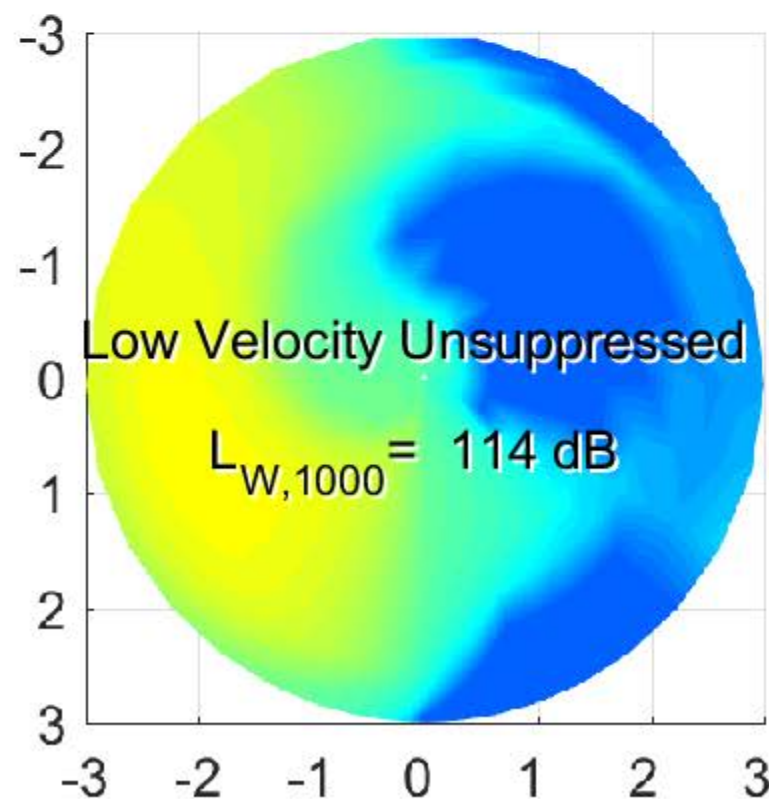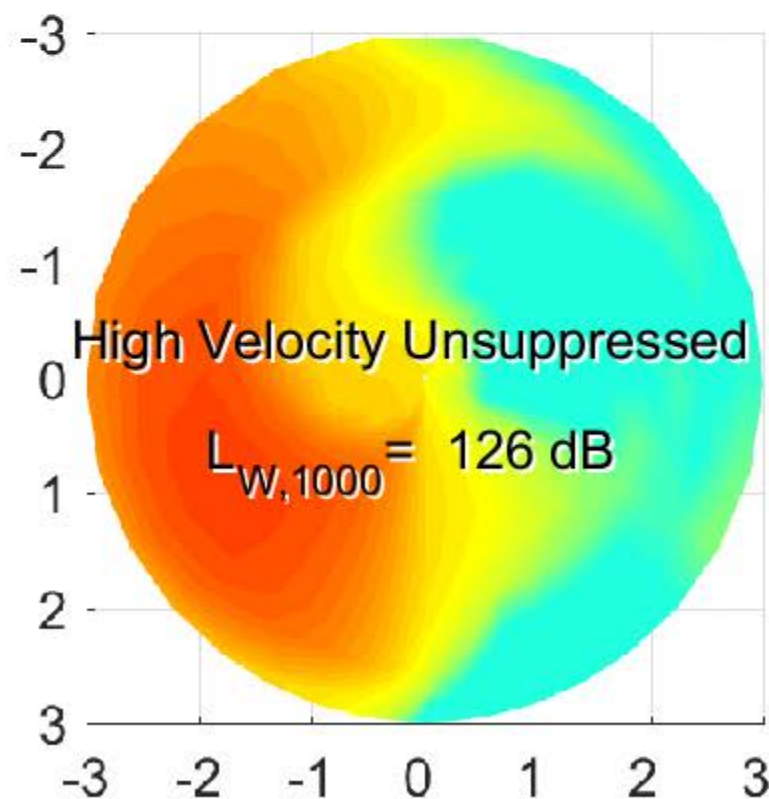

# Savage .22 cal Rifle 1250 Hz

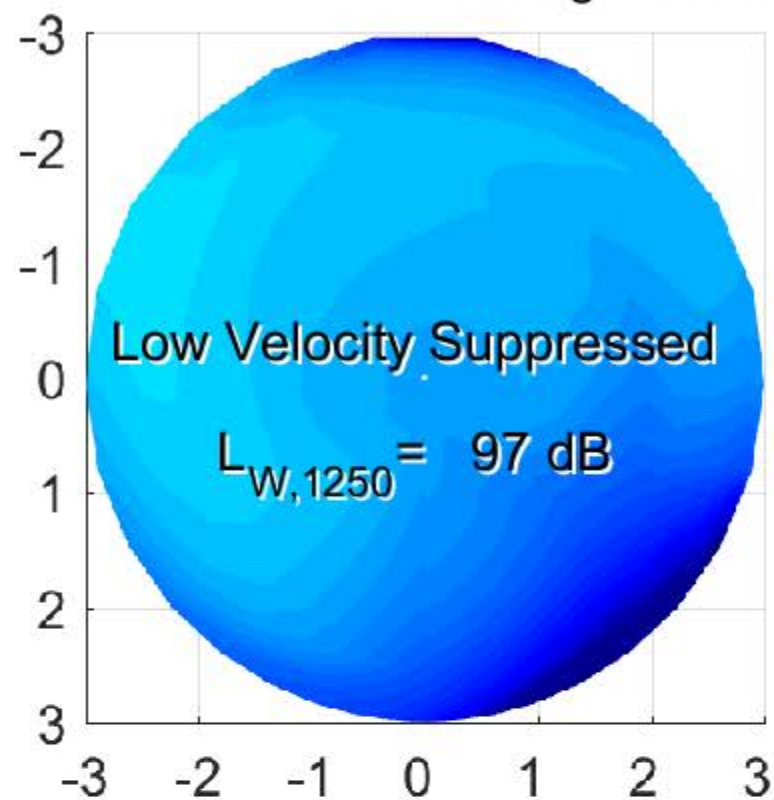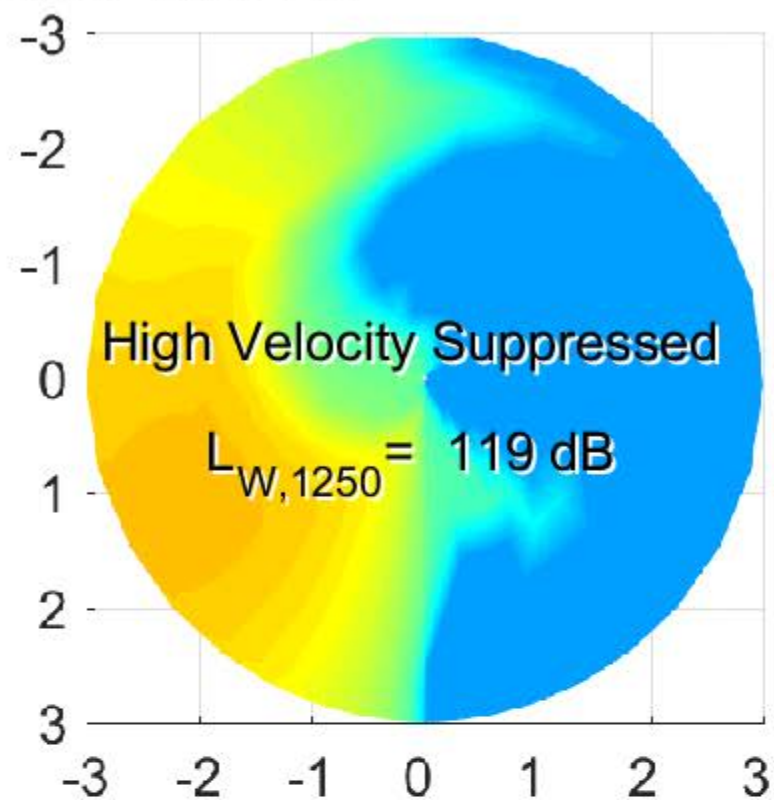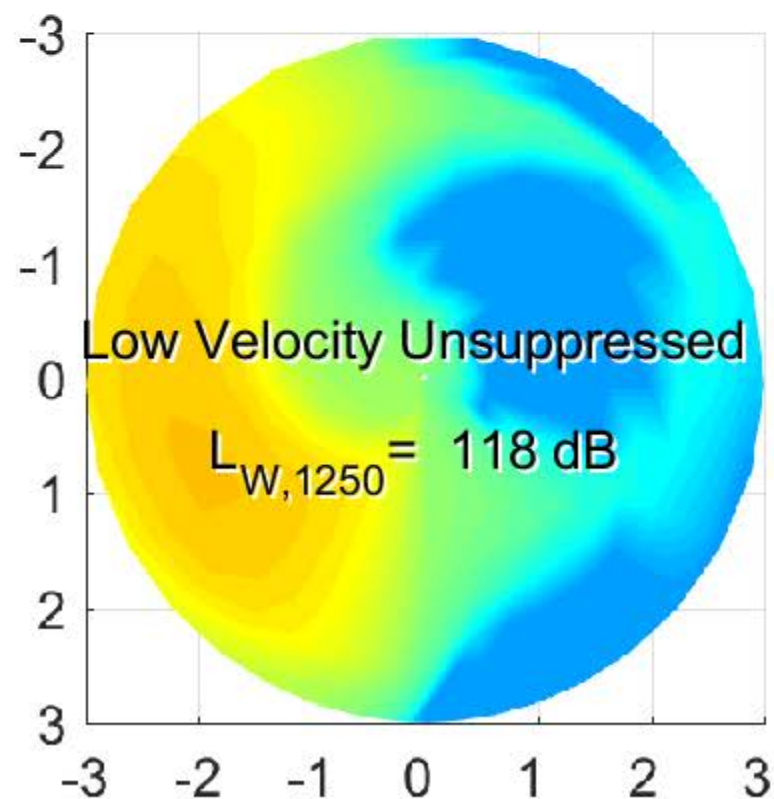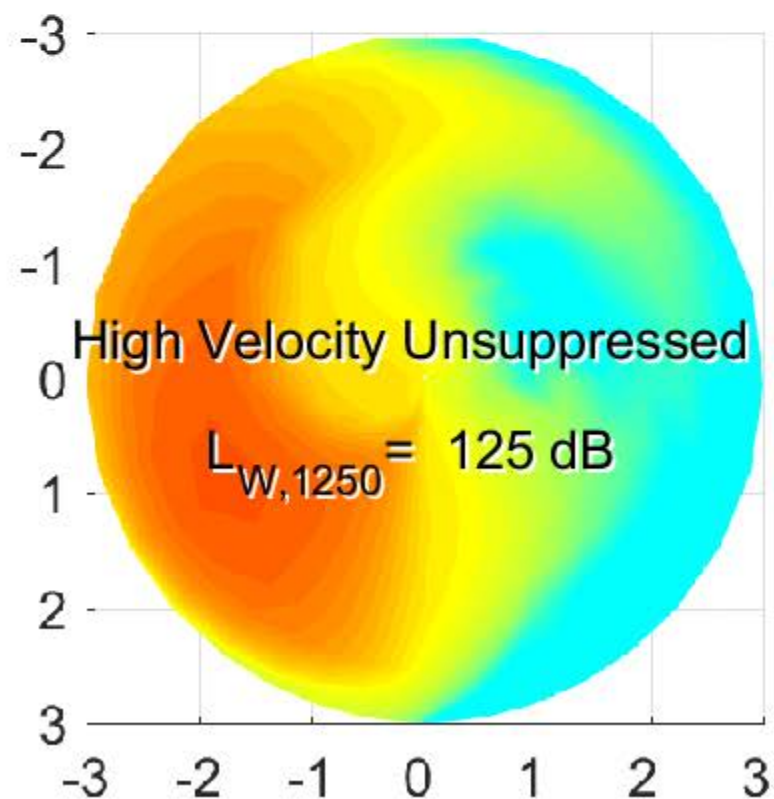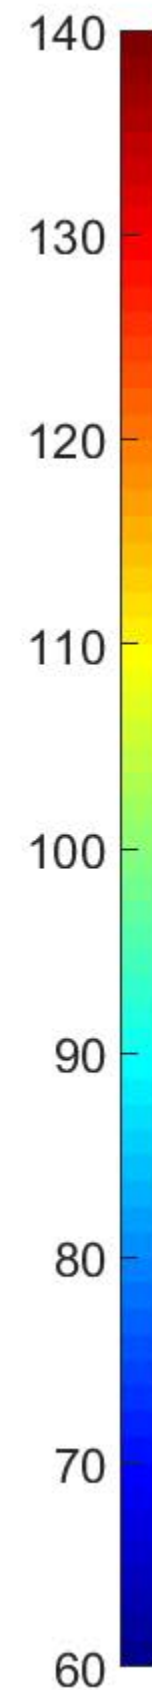

# Savage .22 cal Rifle 1600 Hz

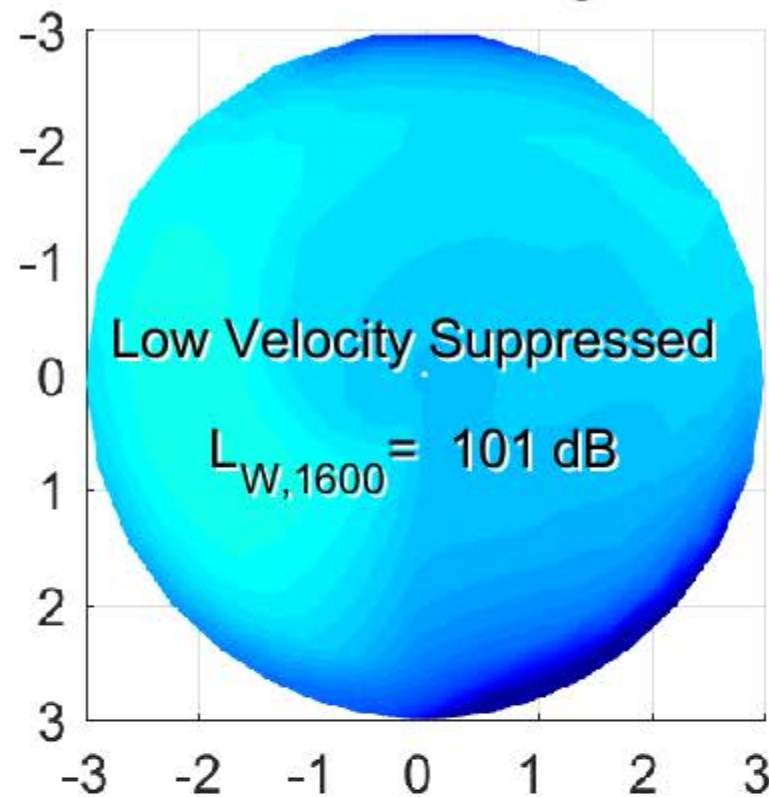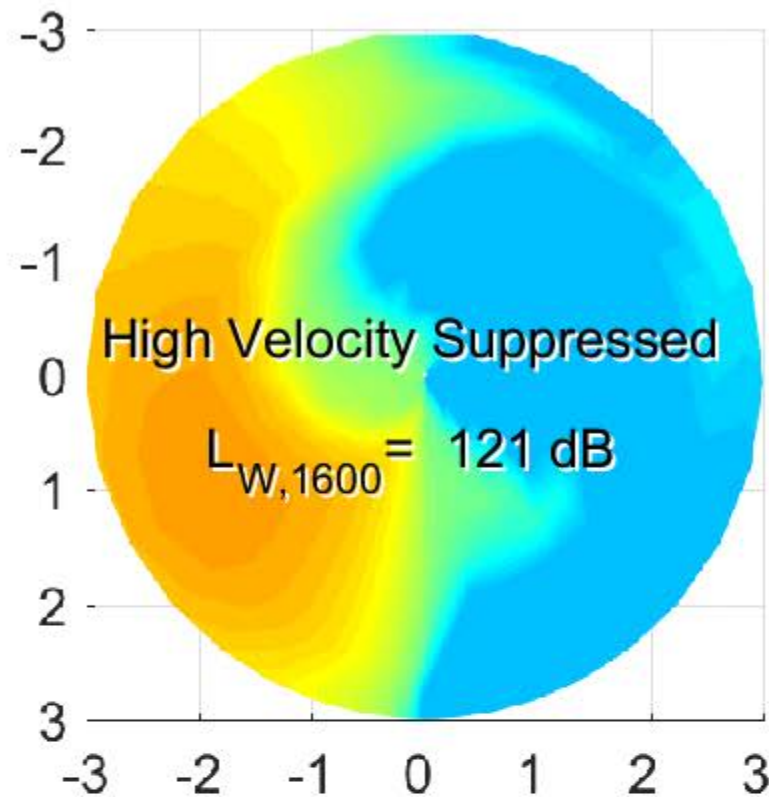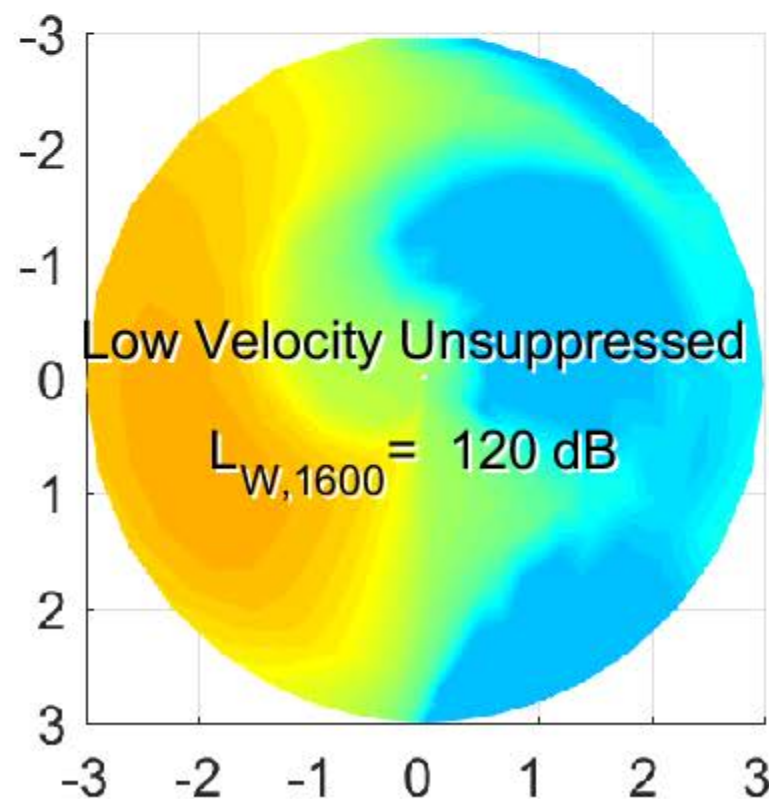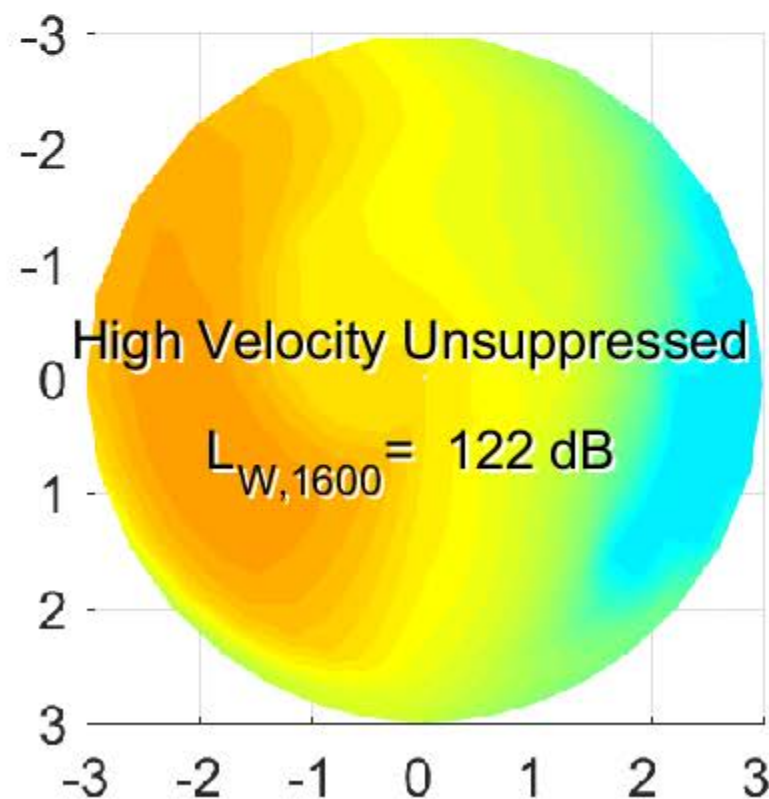

# Savage .22 cal Rifle 2000 Hz

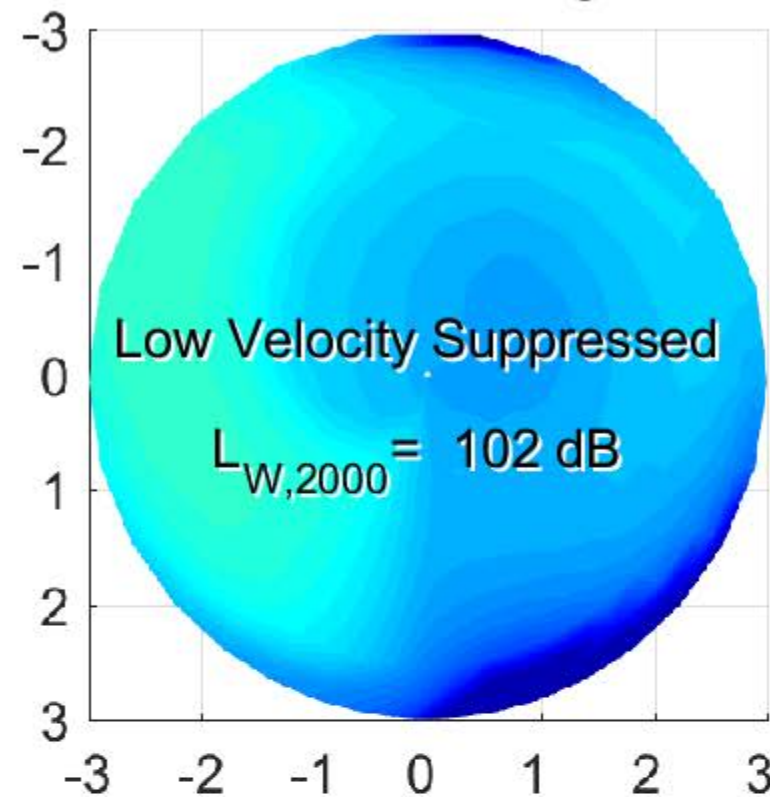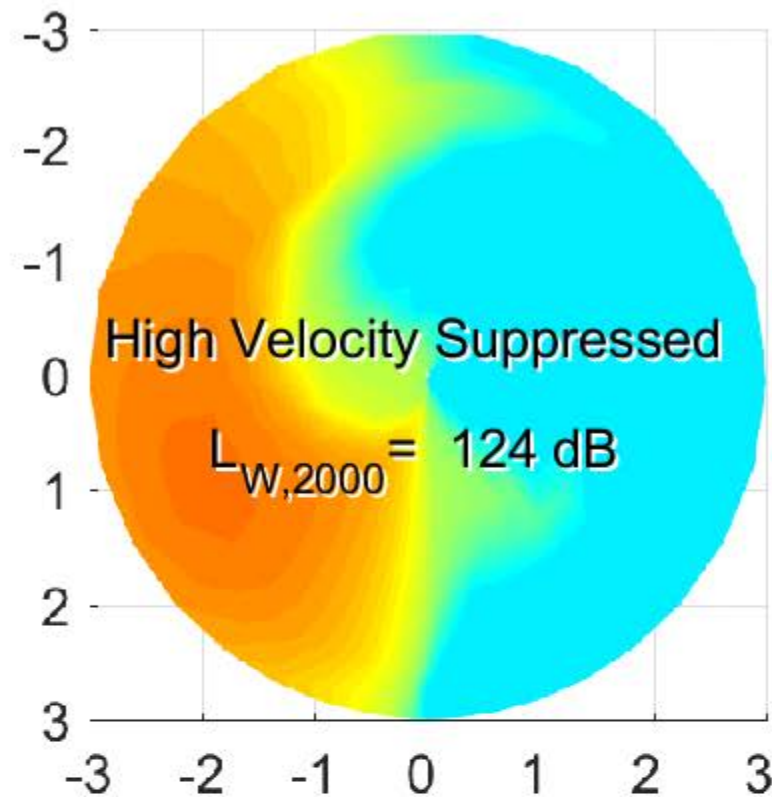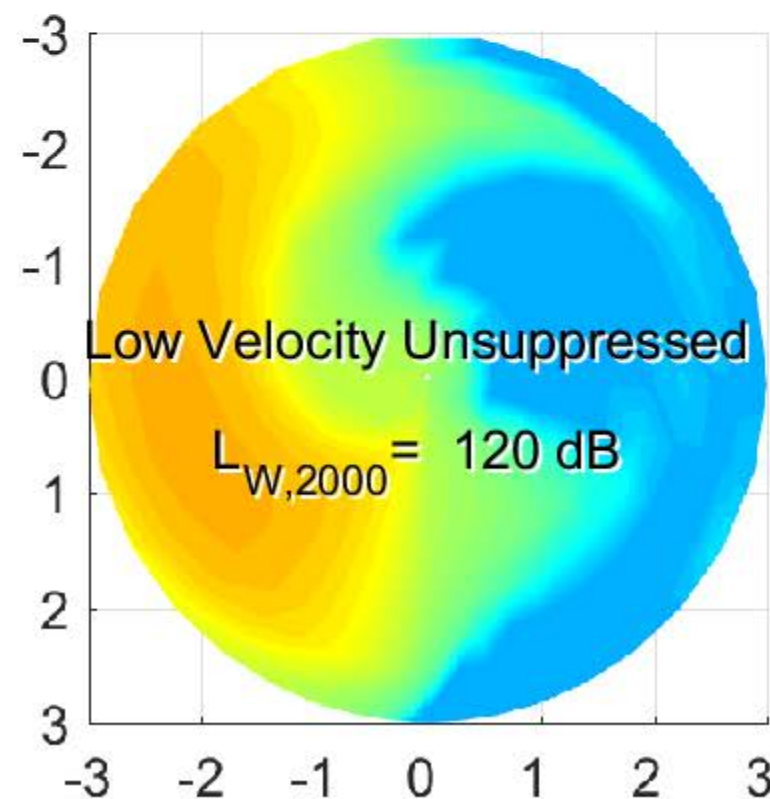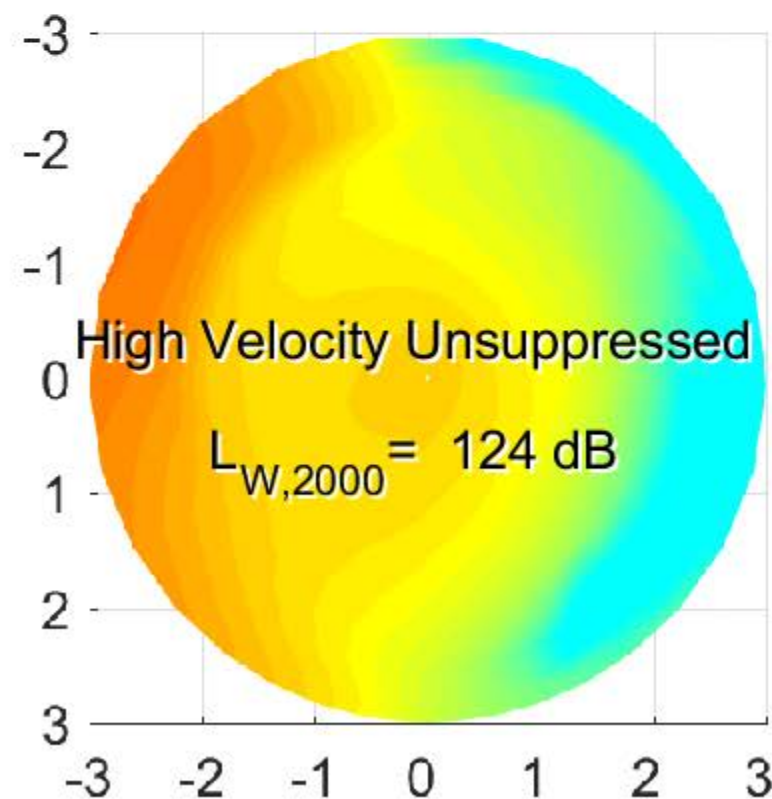

# Savage .22 cal Rifle 2500 Hz

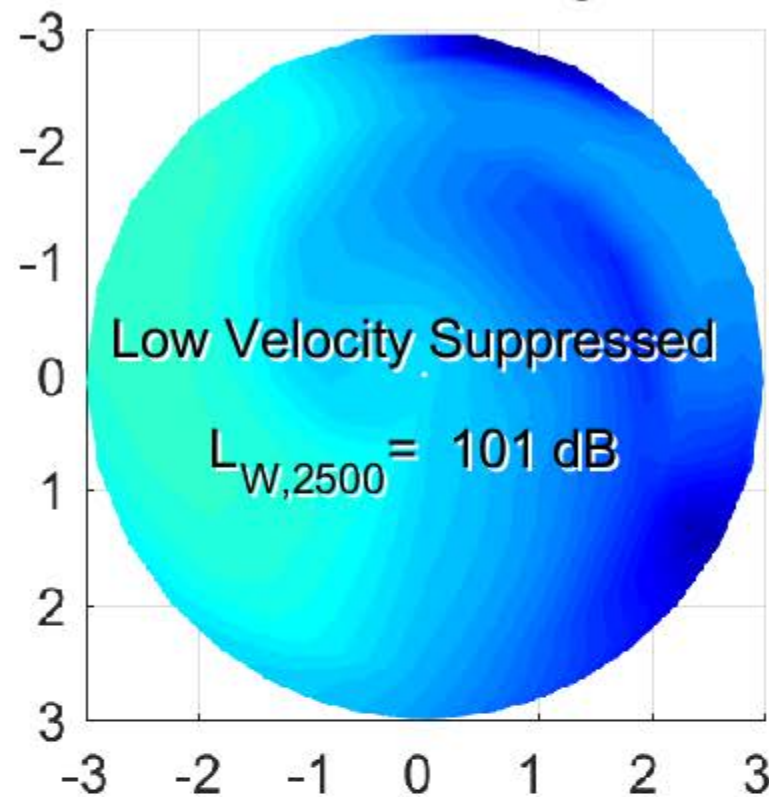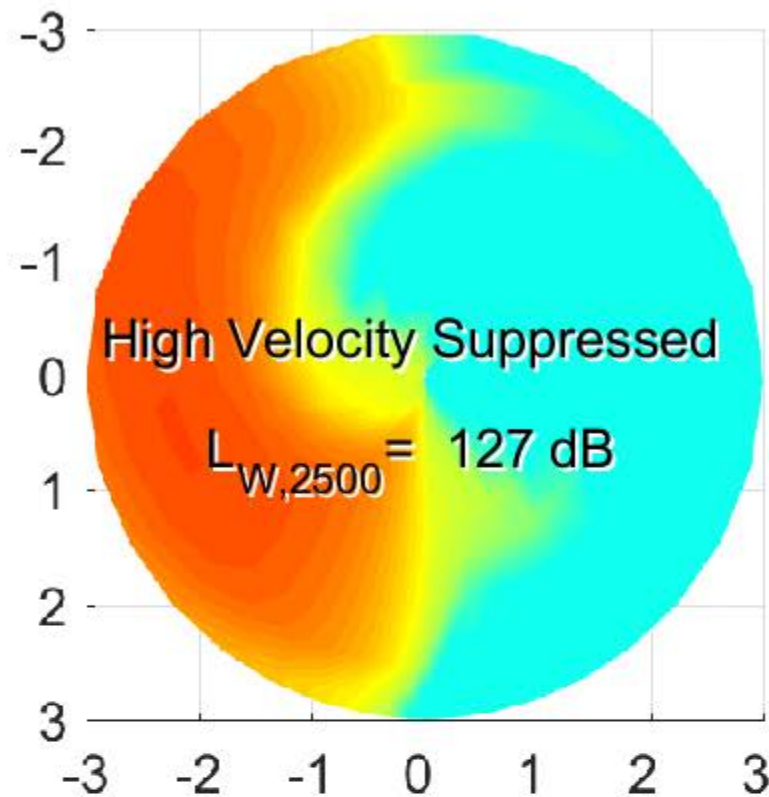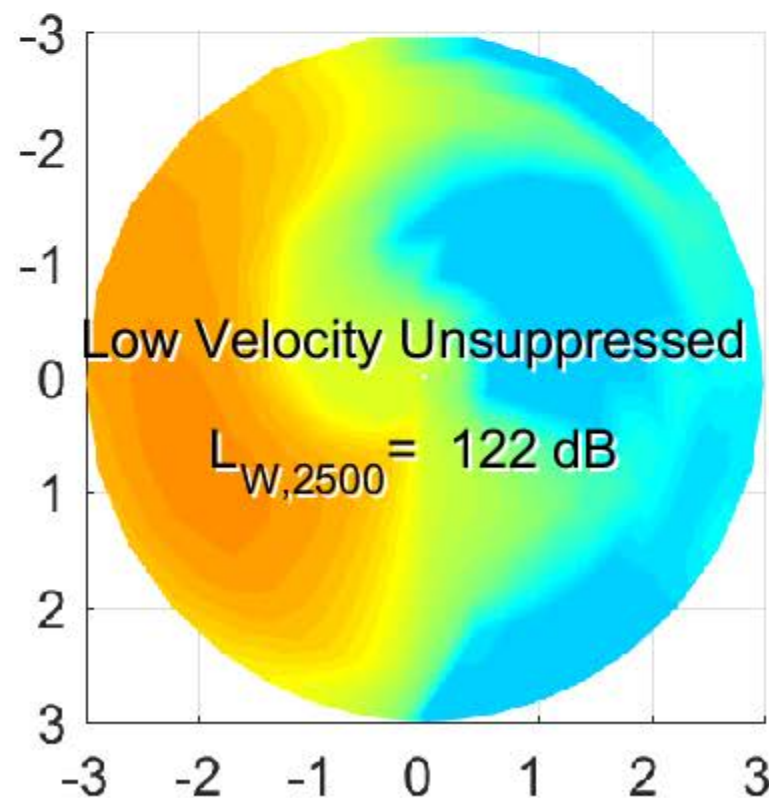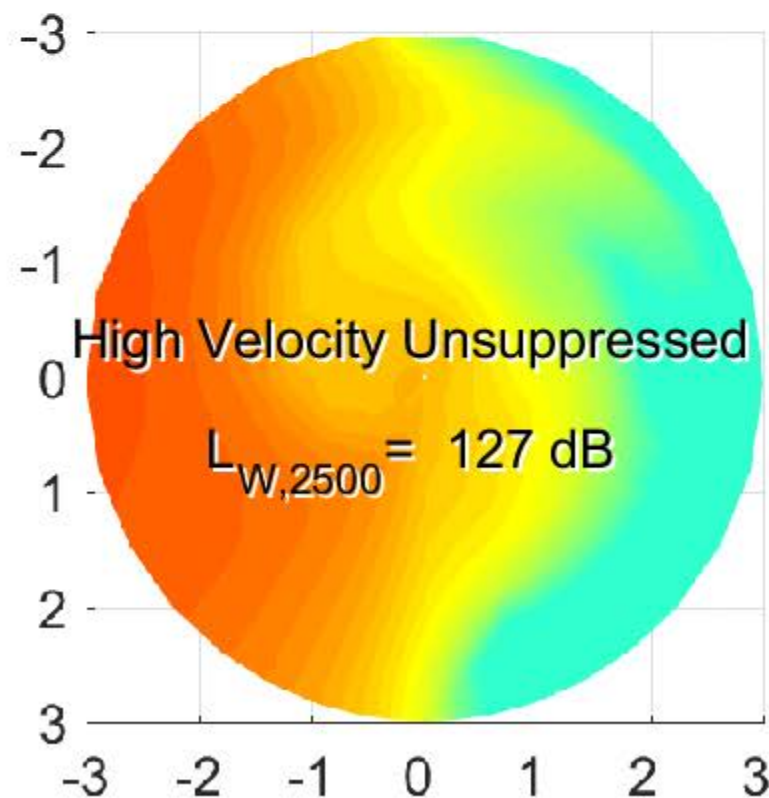

# Savage .22 cal Rifle 3150 Hz

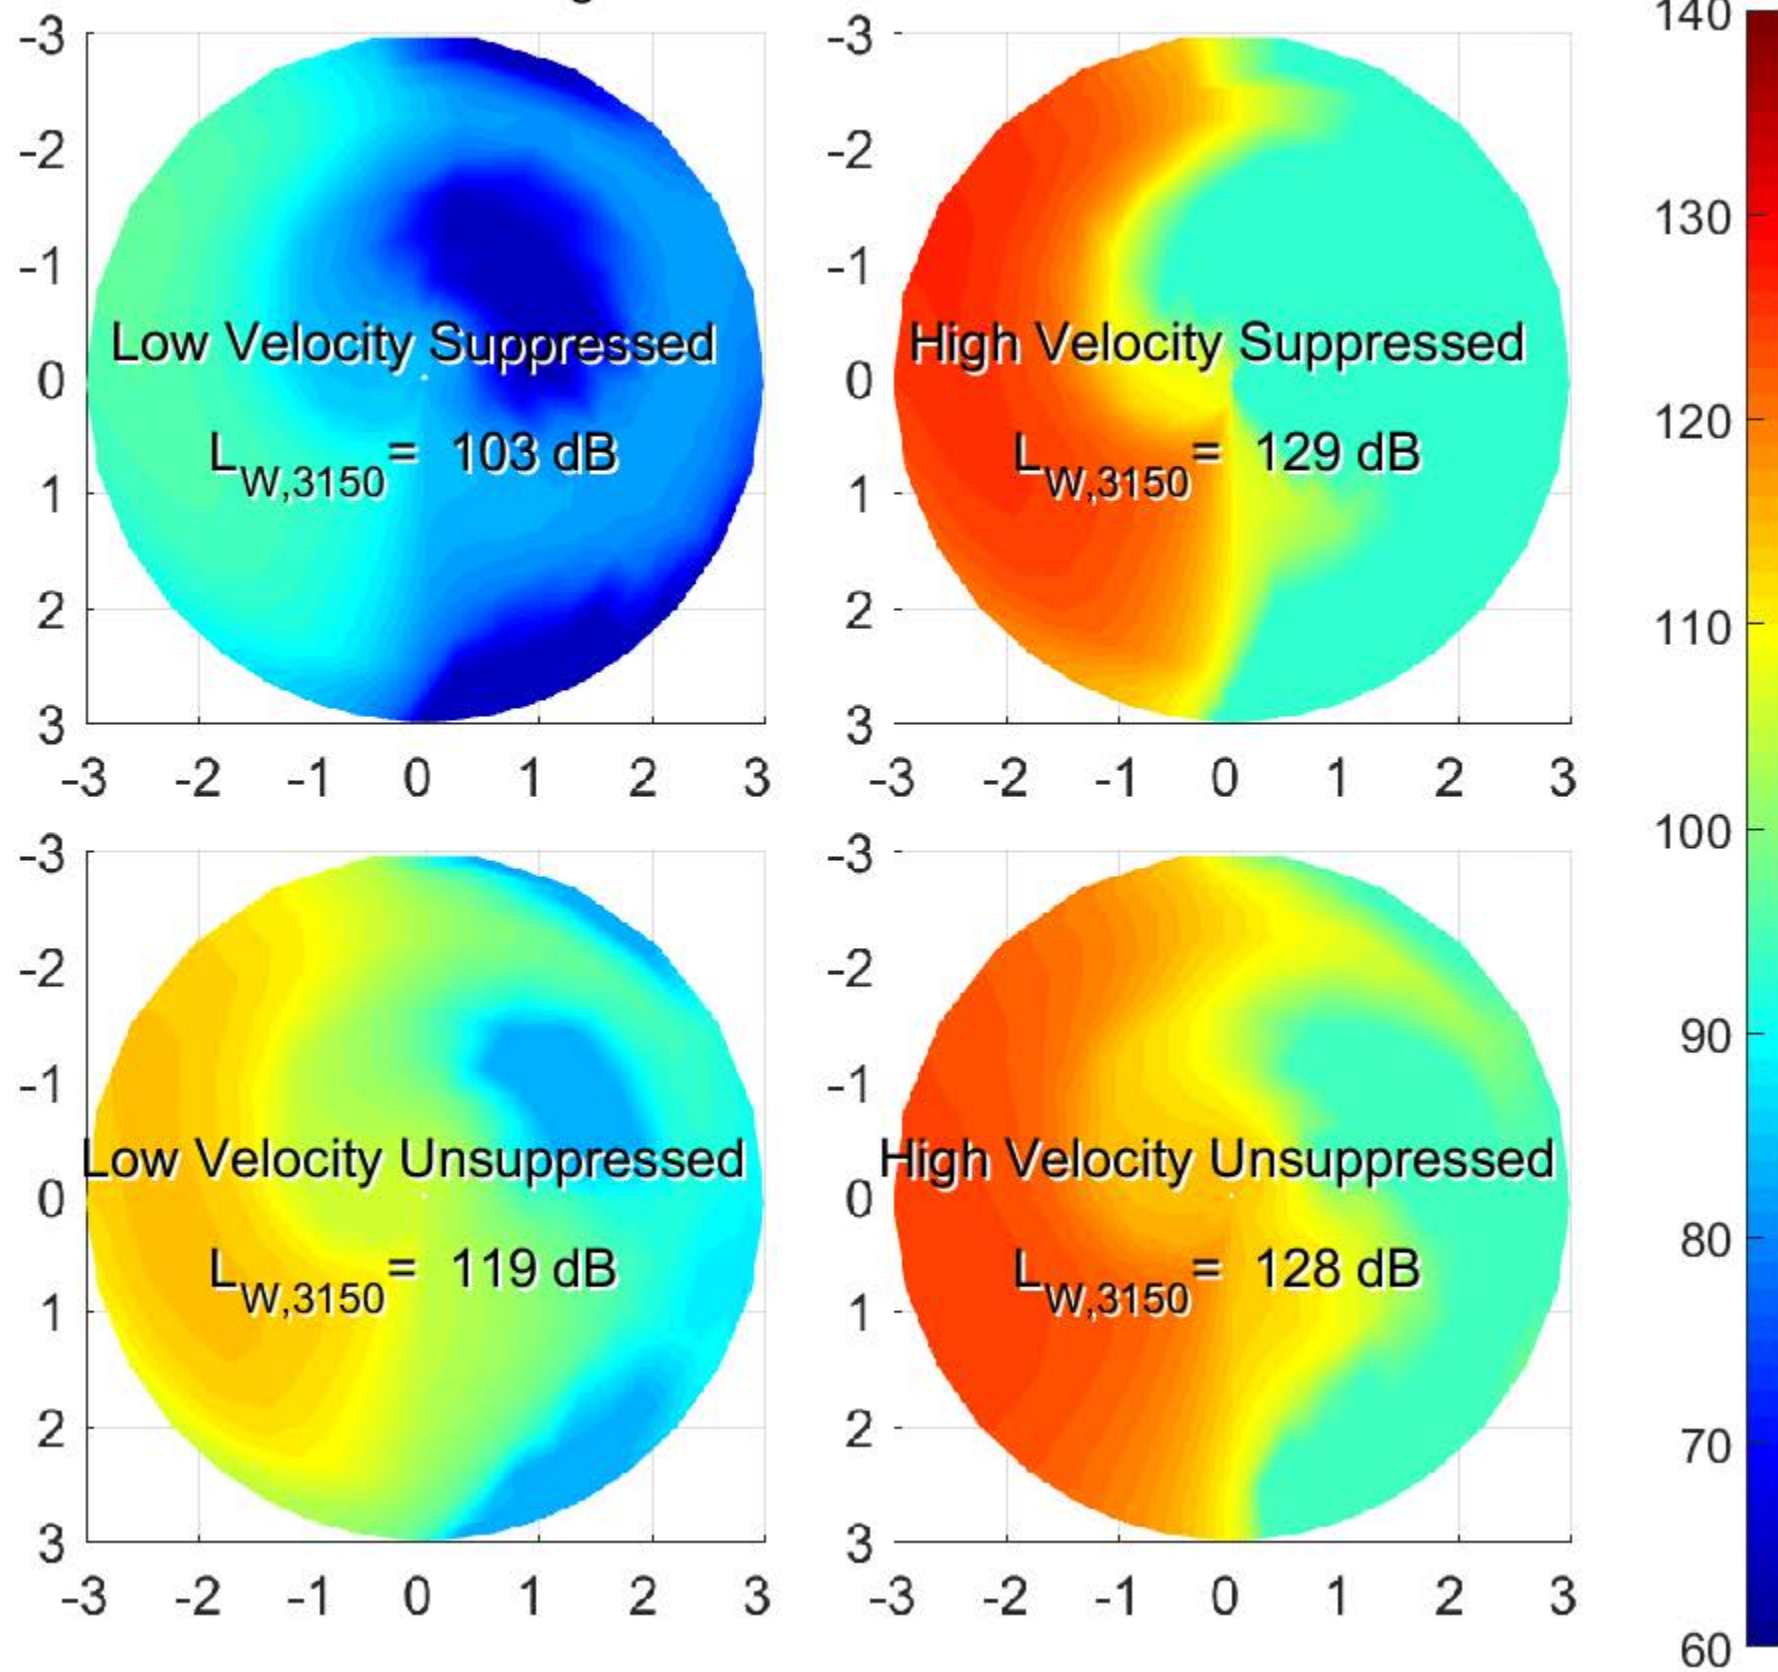

# Savage .22 cal Rifle 4000 Hz

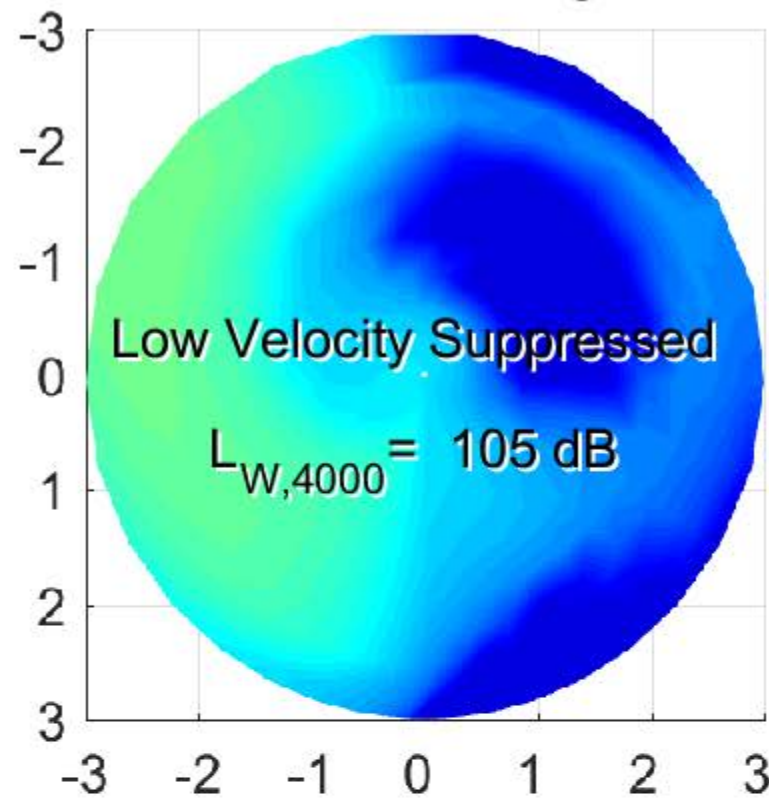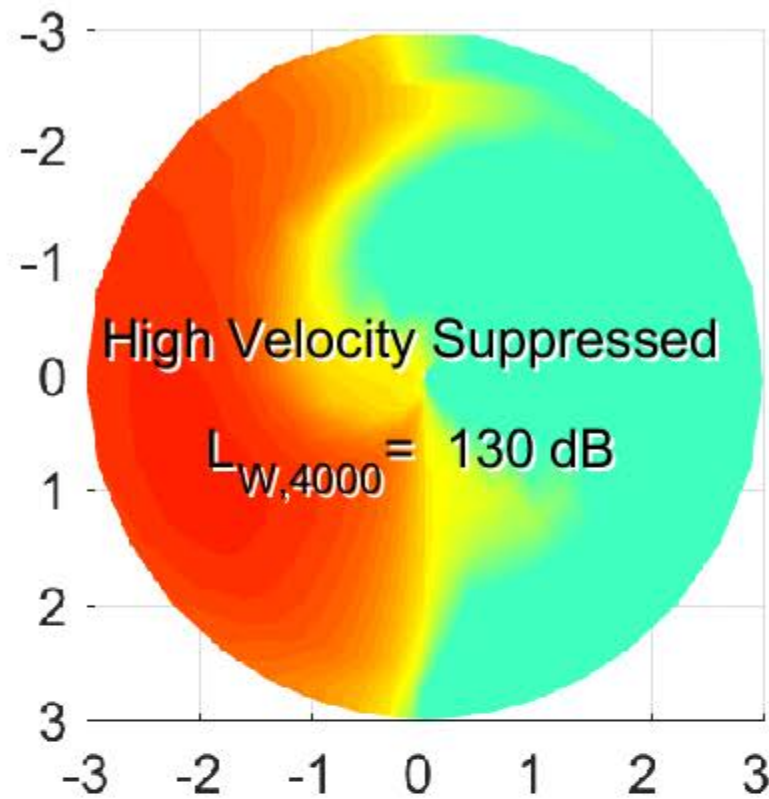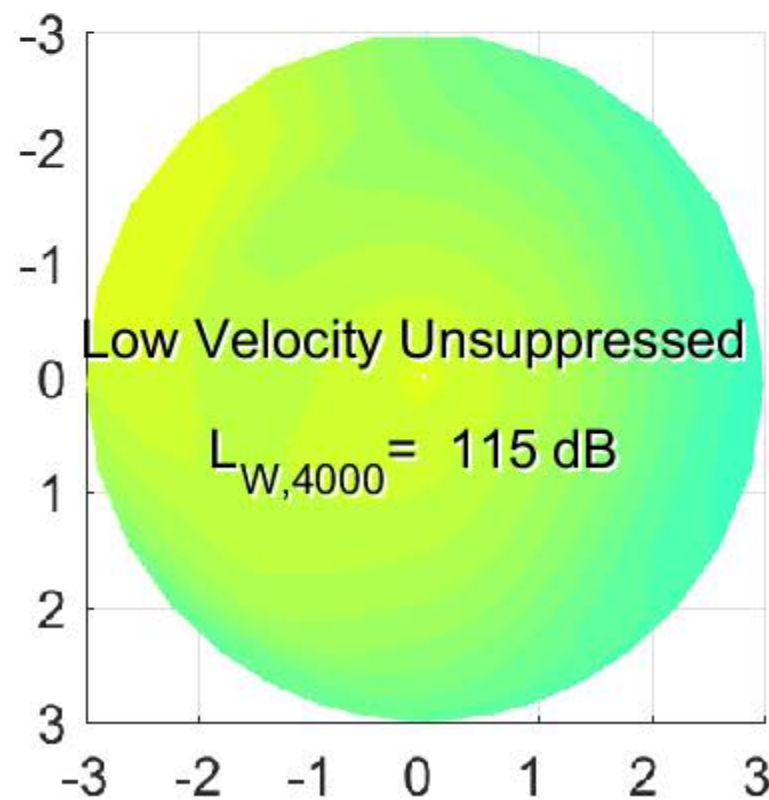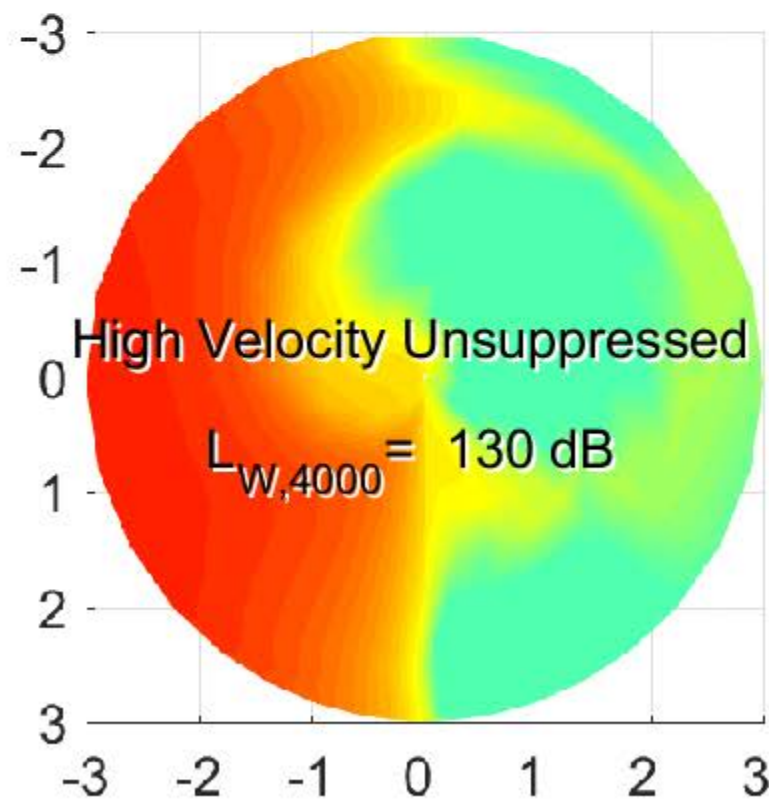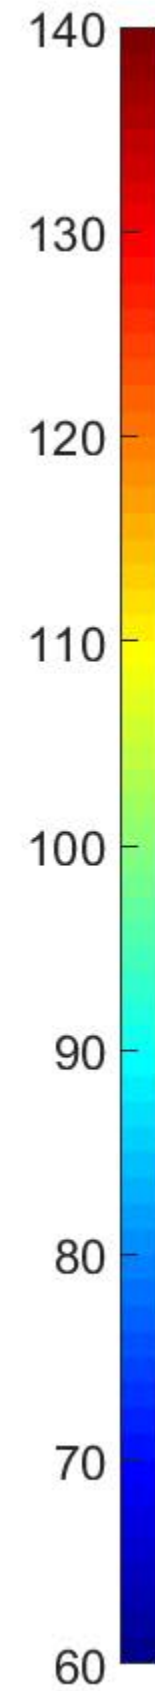

# Savage .22 cal Rifle 5000 Hz

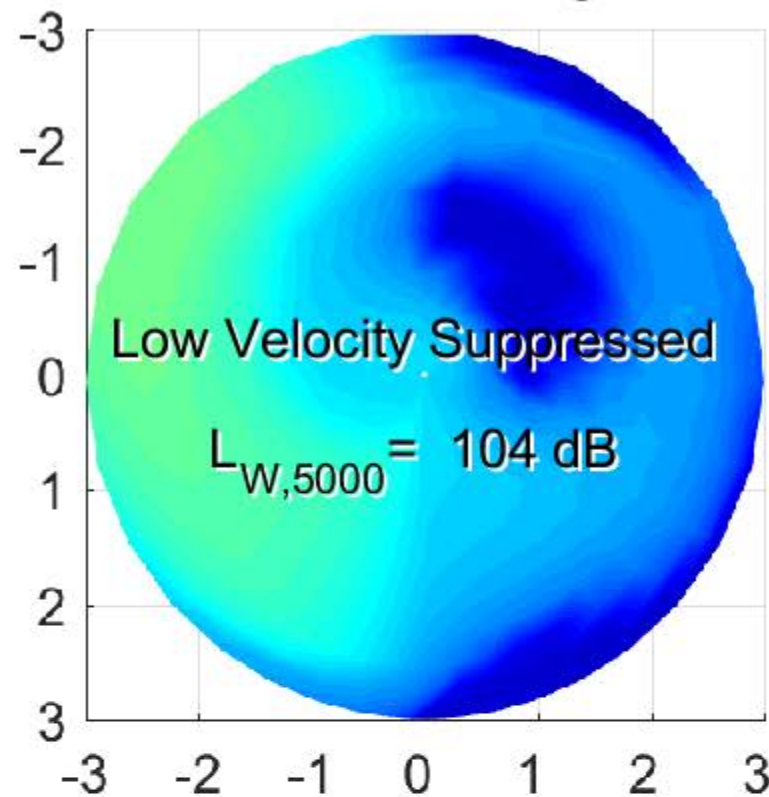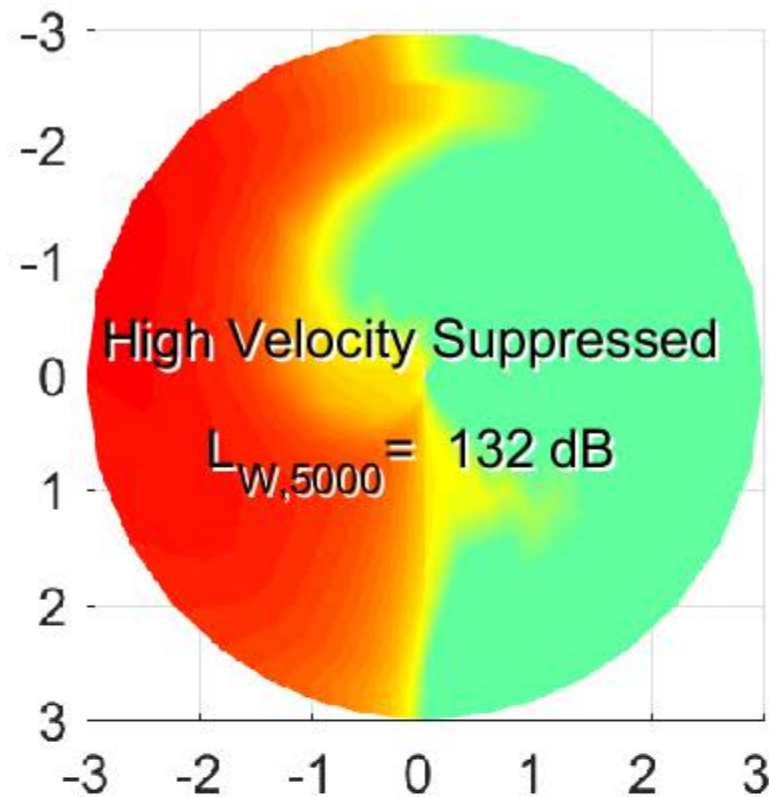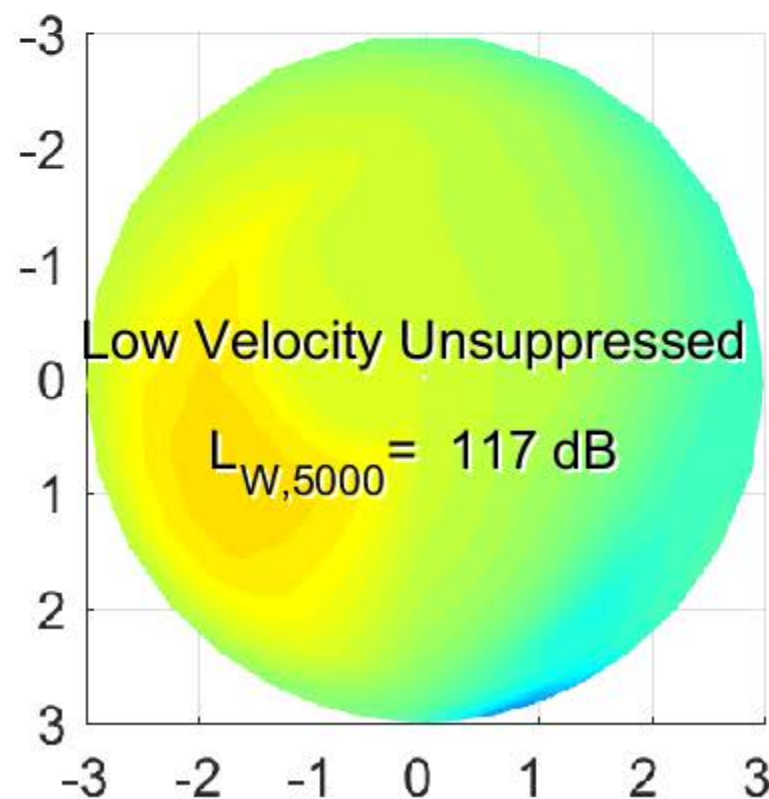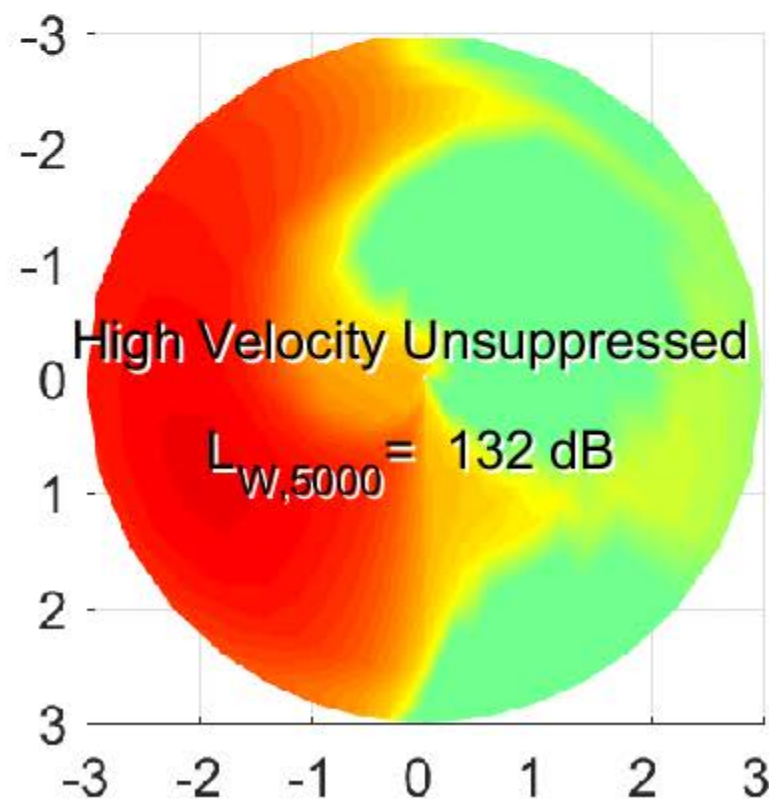

# Savage .22 cal Rifle 6300 Hz

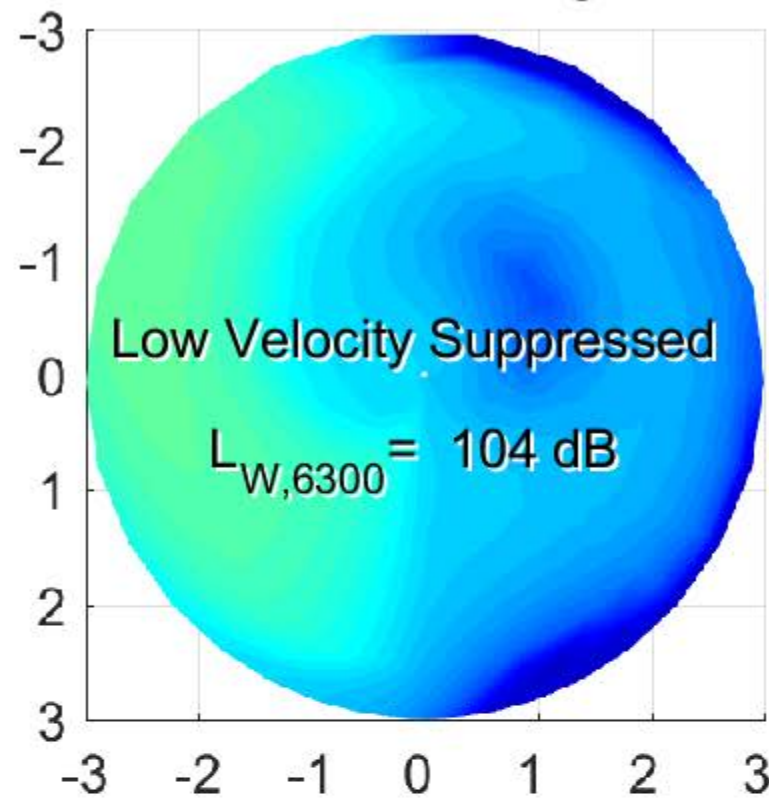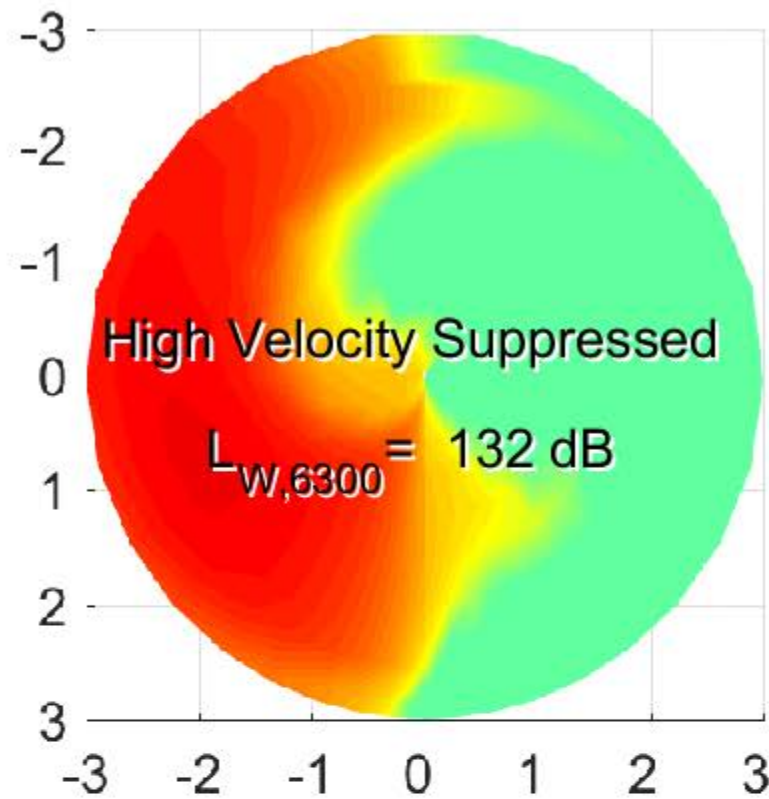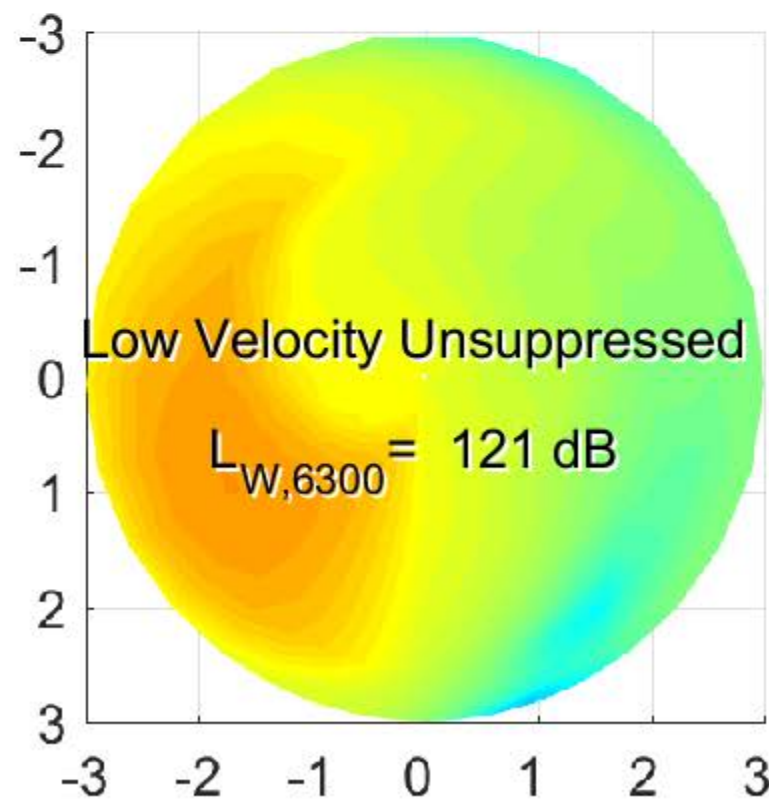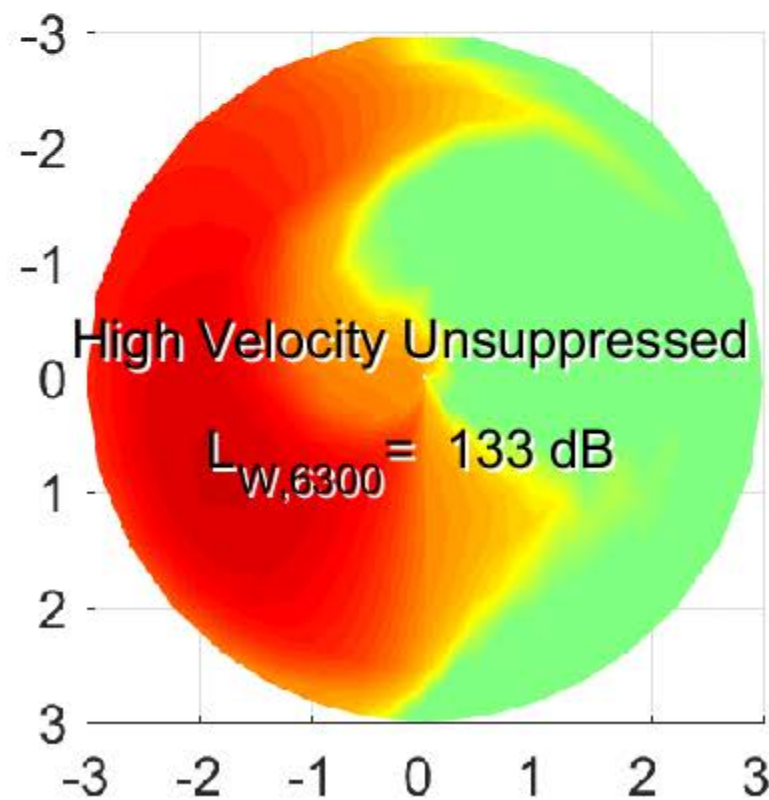

# Savage .22 cal Rifle 8000 Hz

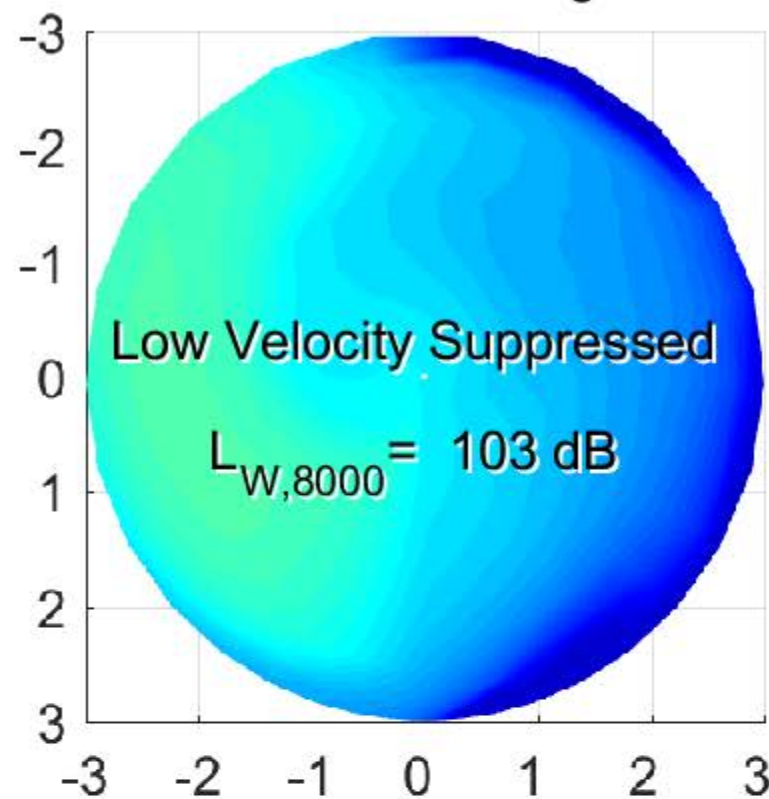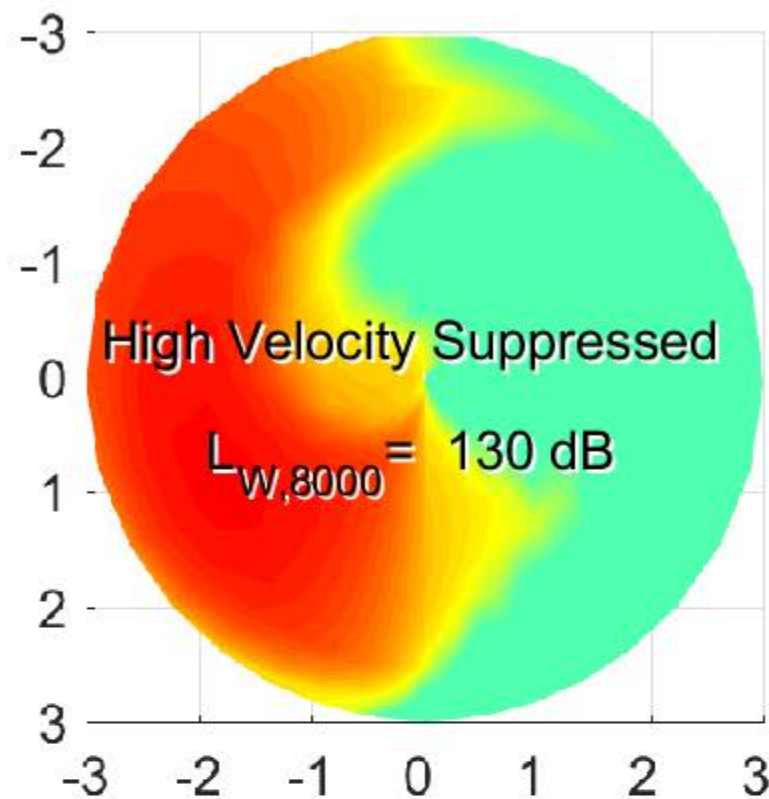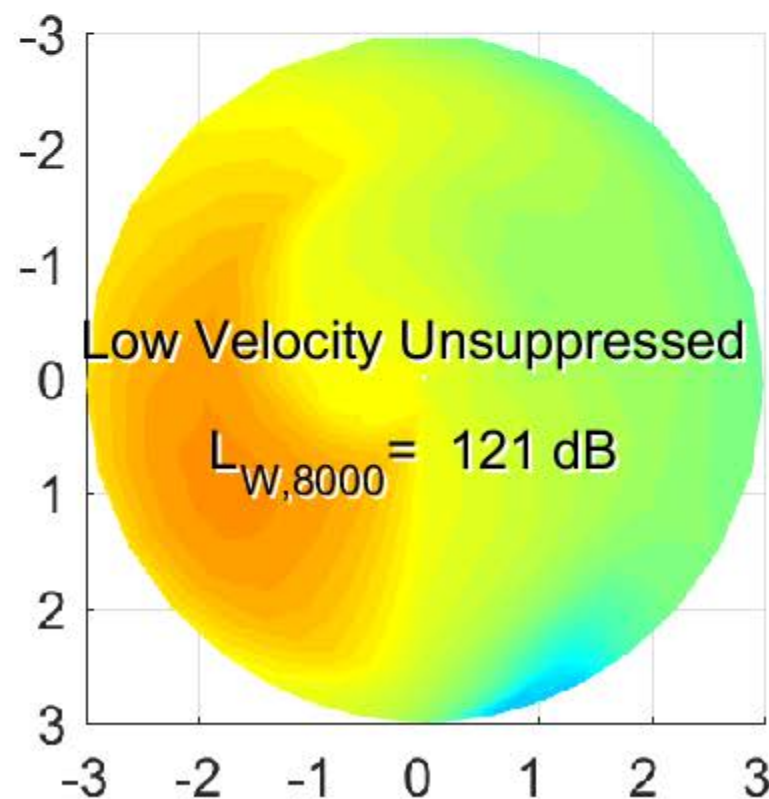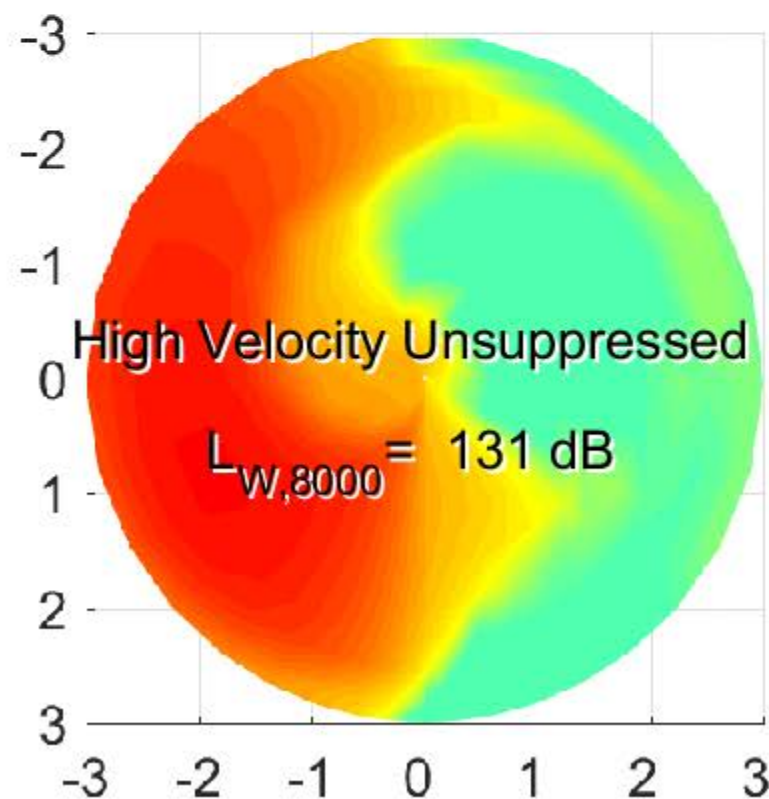

# Savage .22 cal Rifle 10000 Hz

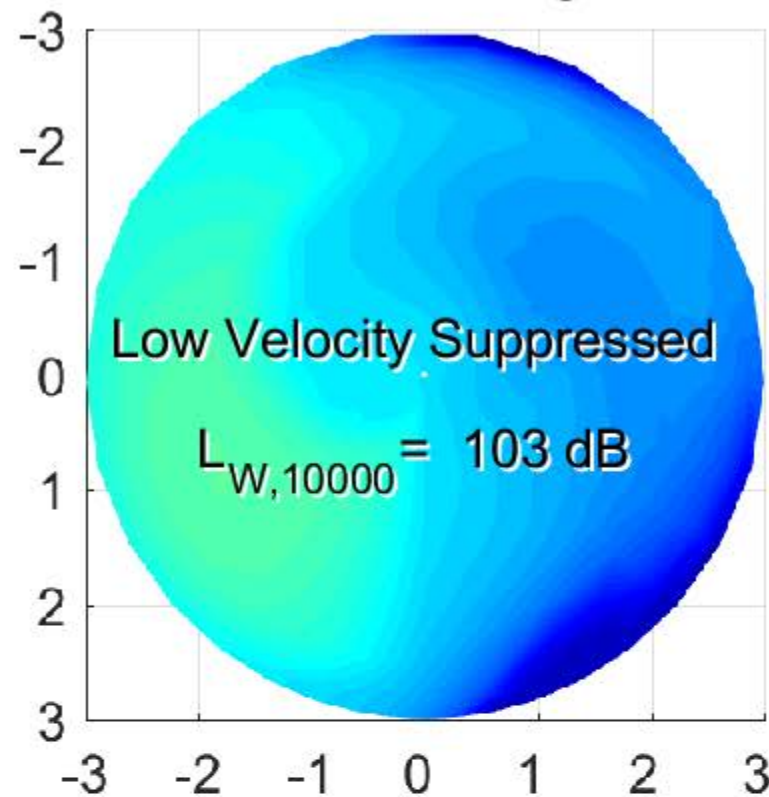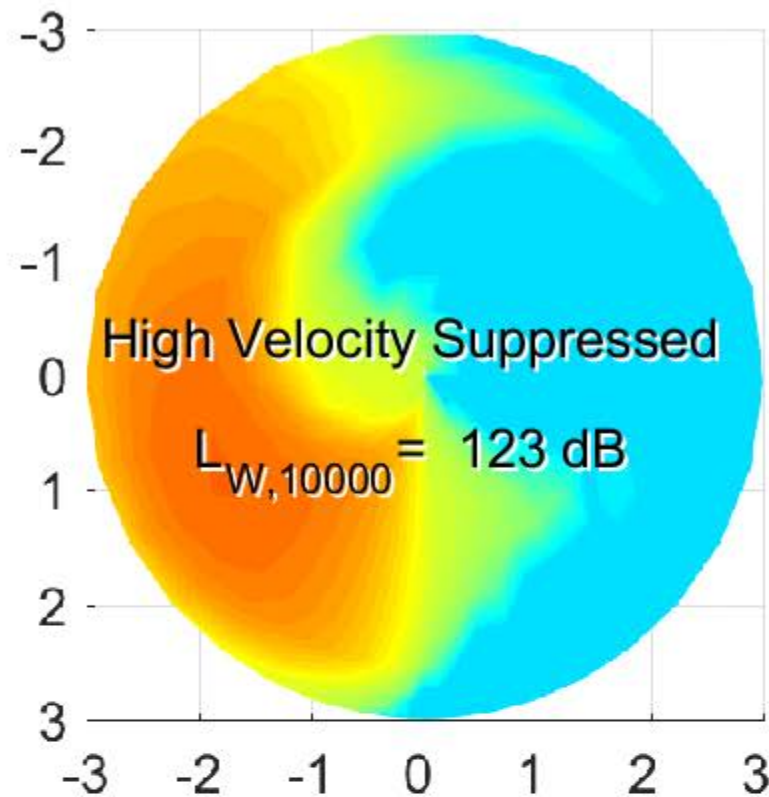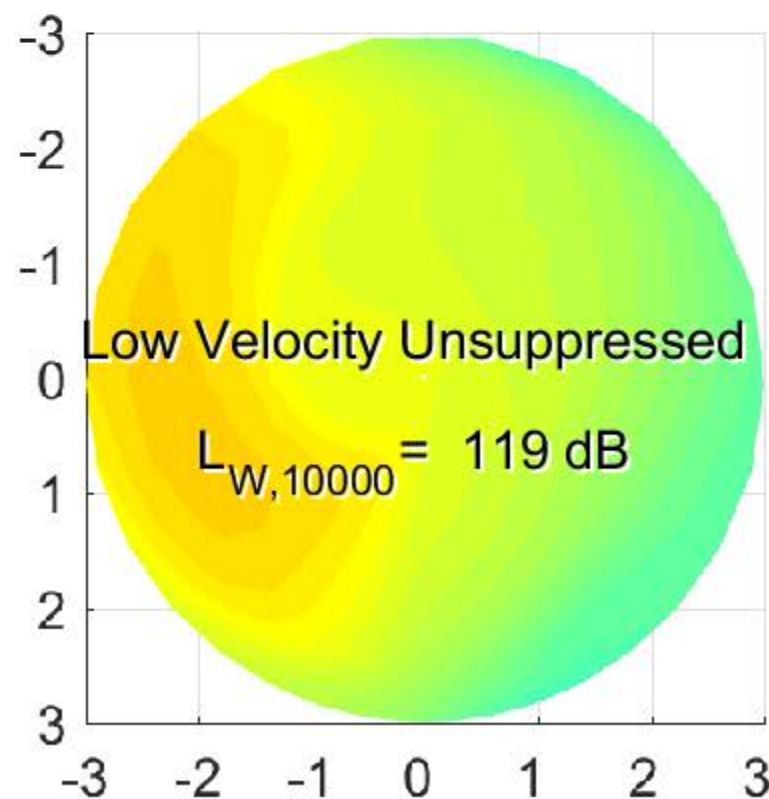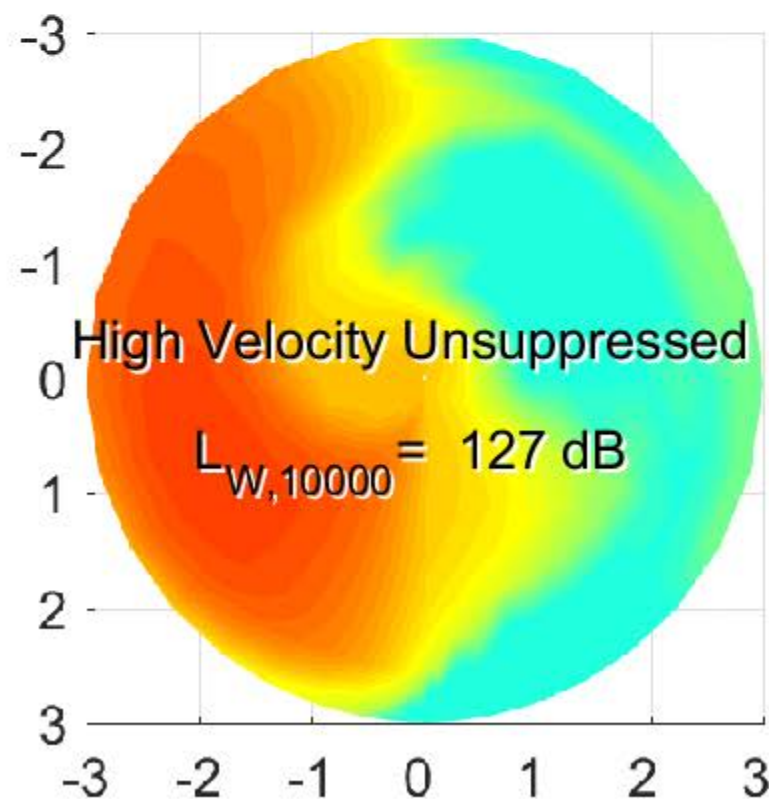

# Savage .22 cal Rifle 12500 Hz

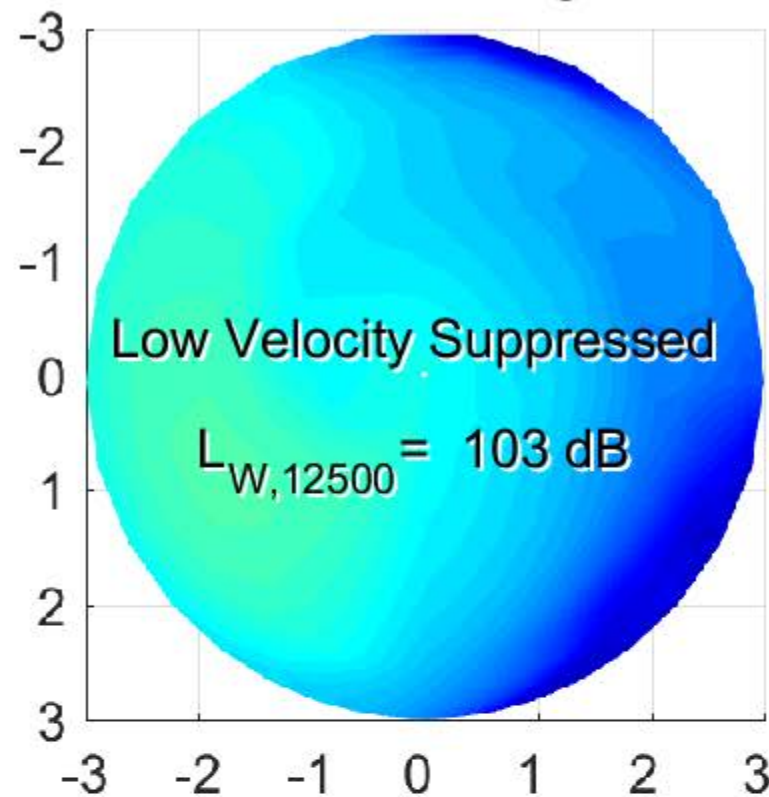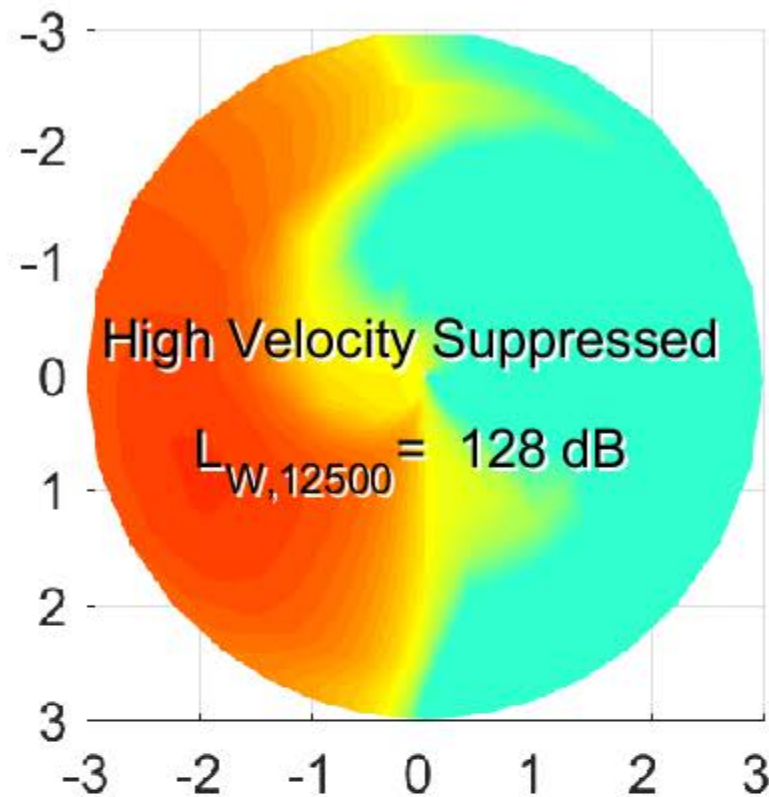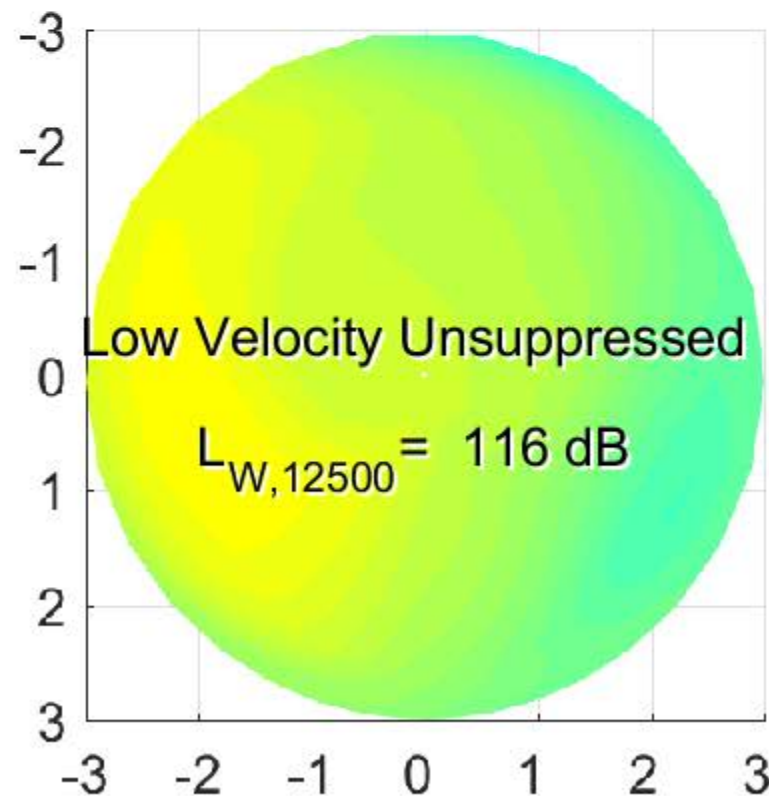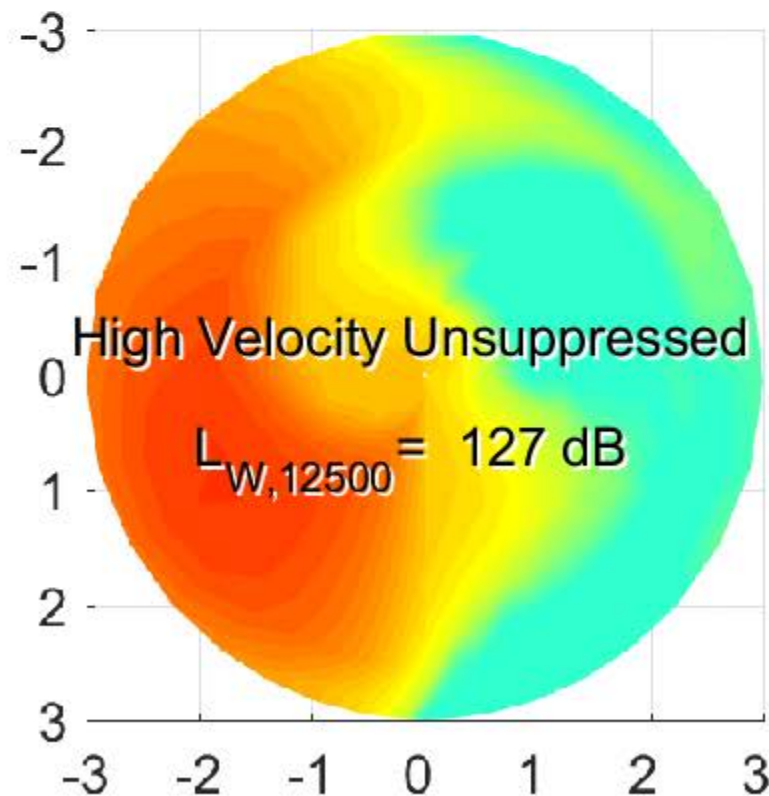

# Savage .22 cal Rifle 16000 Hz

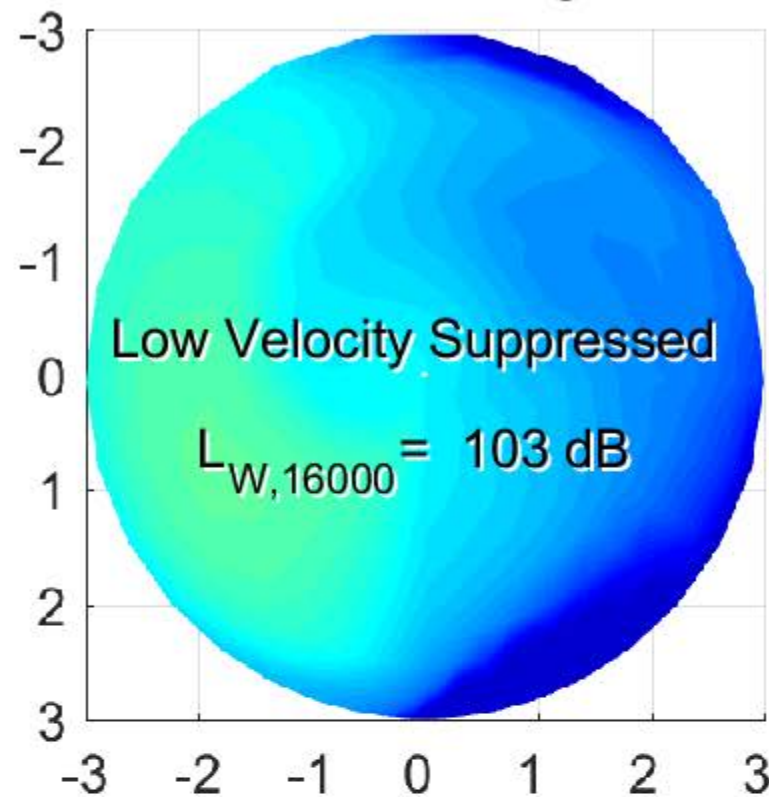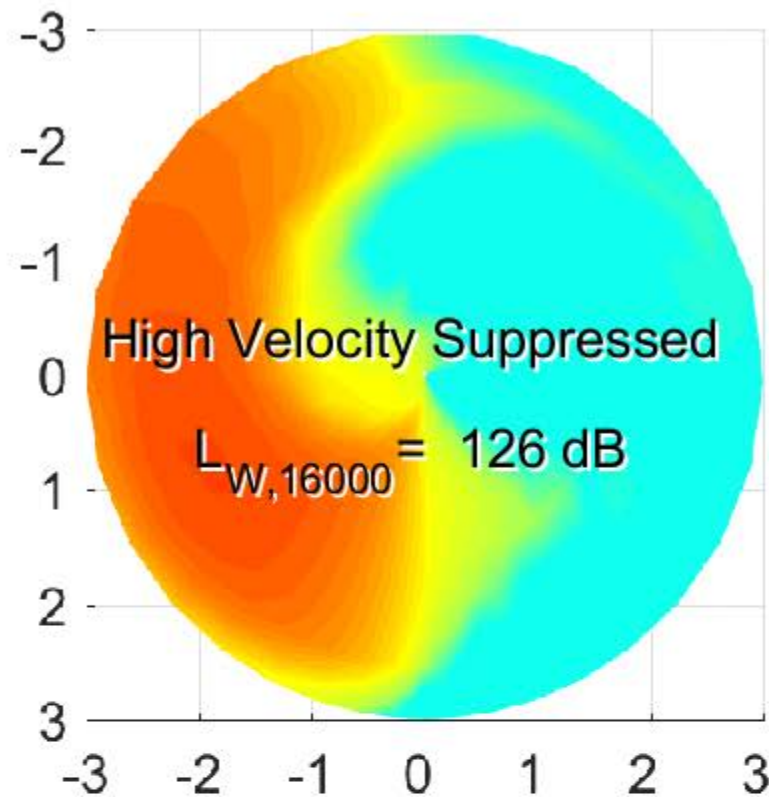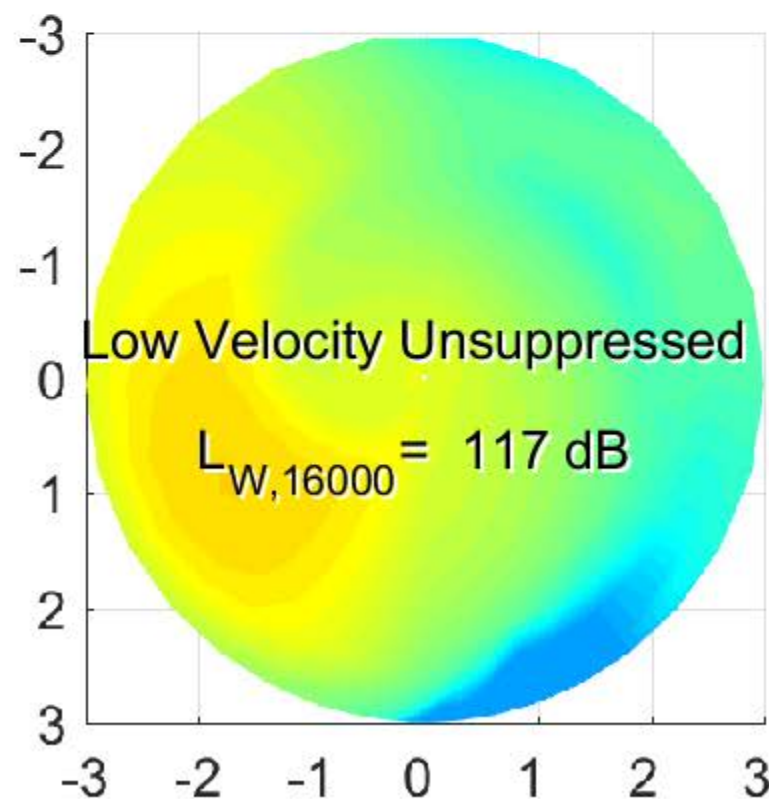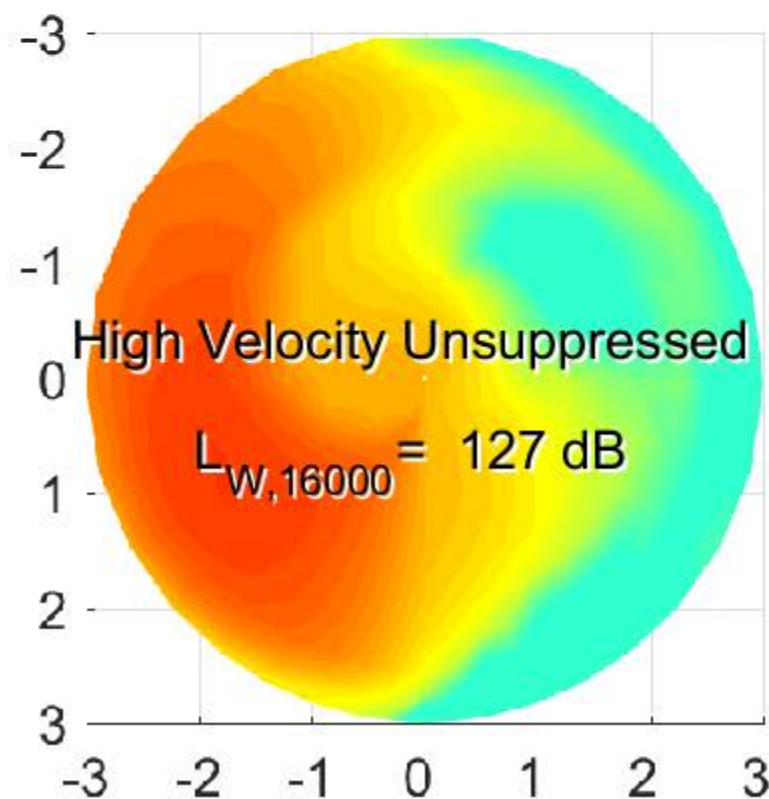

# Savage .22 cal Rifle 20000 Hz

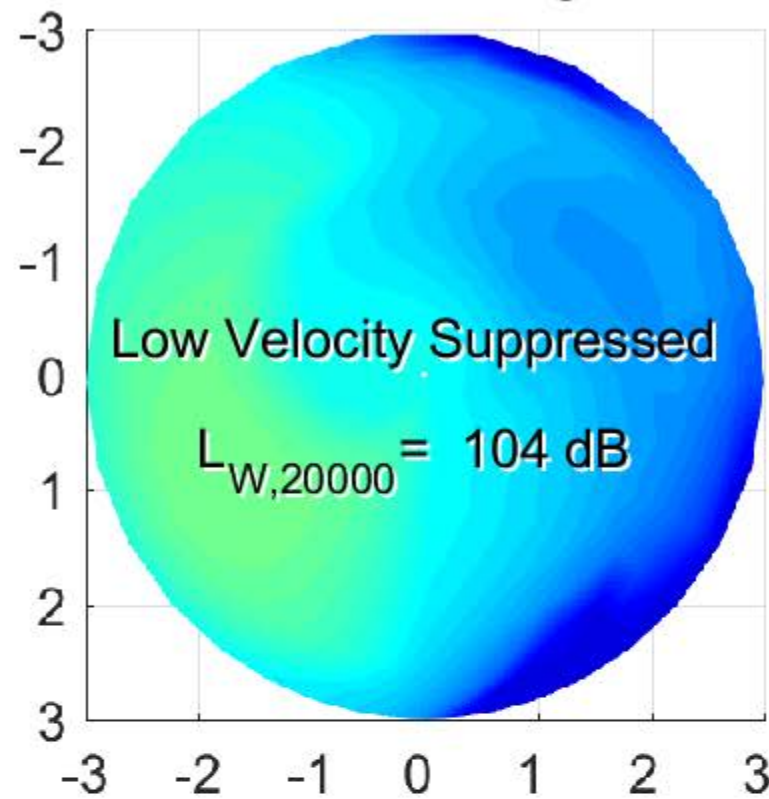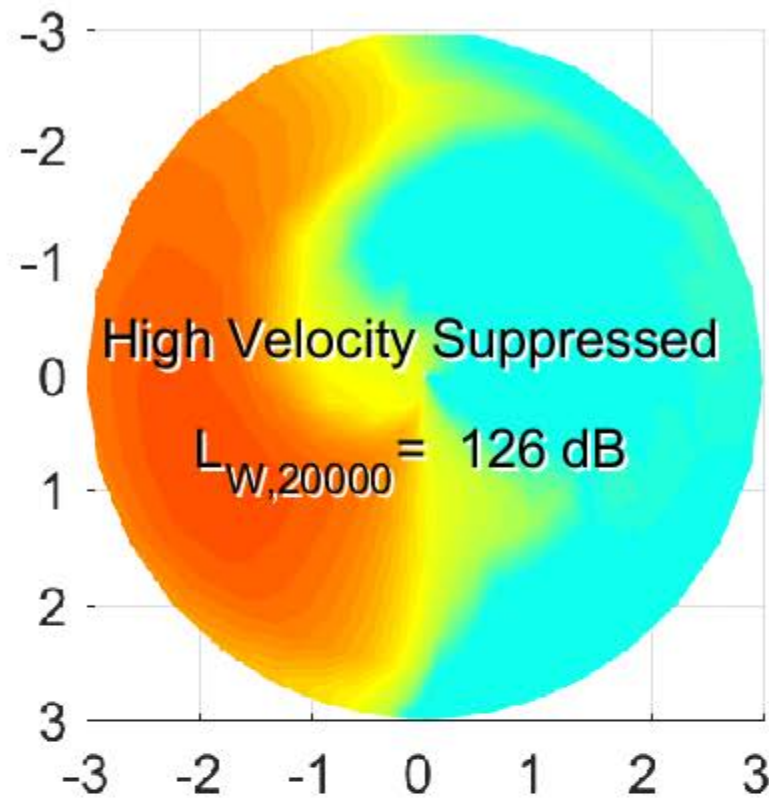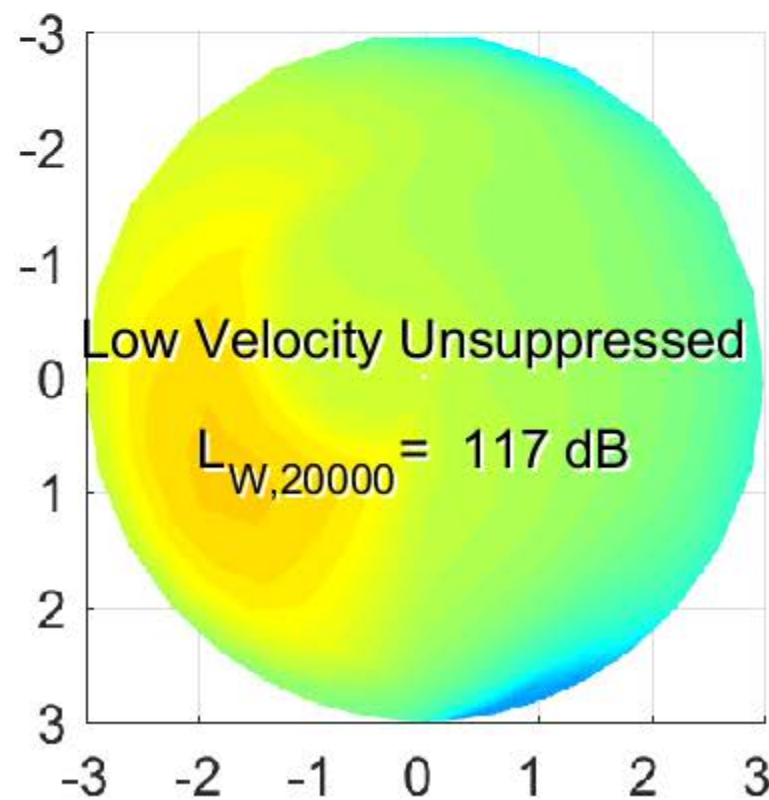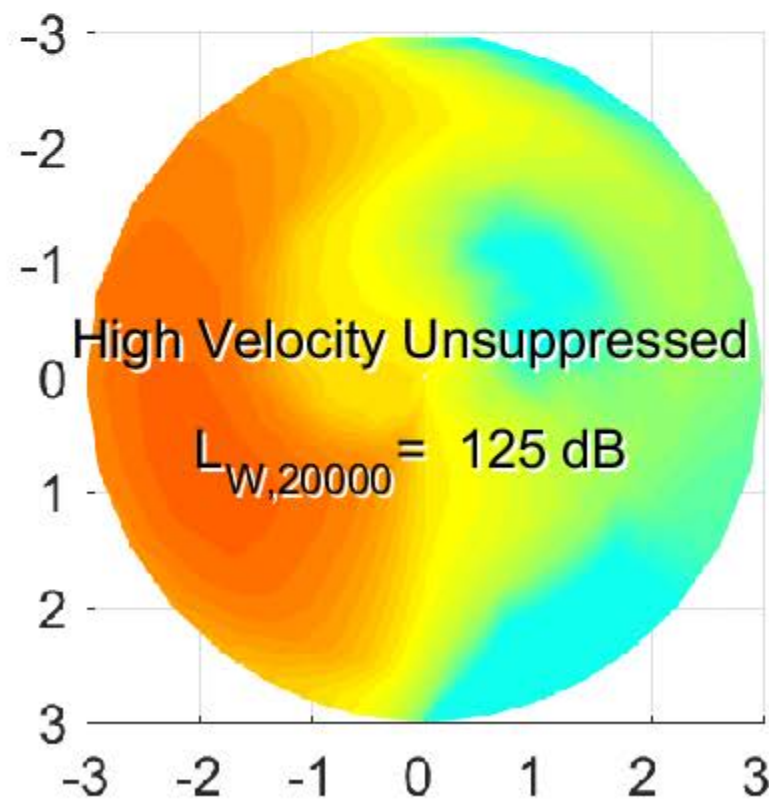

Supplement: Supplementary file 1 [file 1]
