# Supplementary material
Source: publisher figshare collection journal article supplement (https://tandf.figshare.com/articles/dataset/_/5764659)

# Ruger .22 cal Pistol 20 Hz

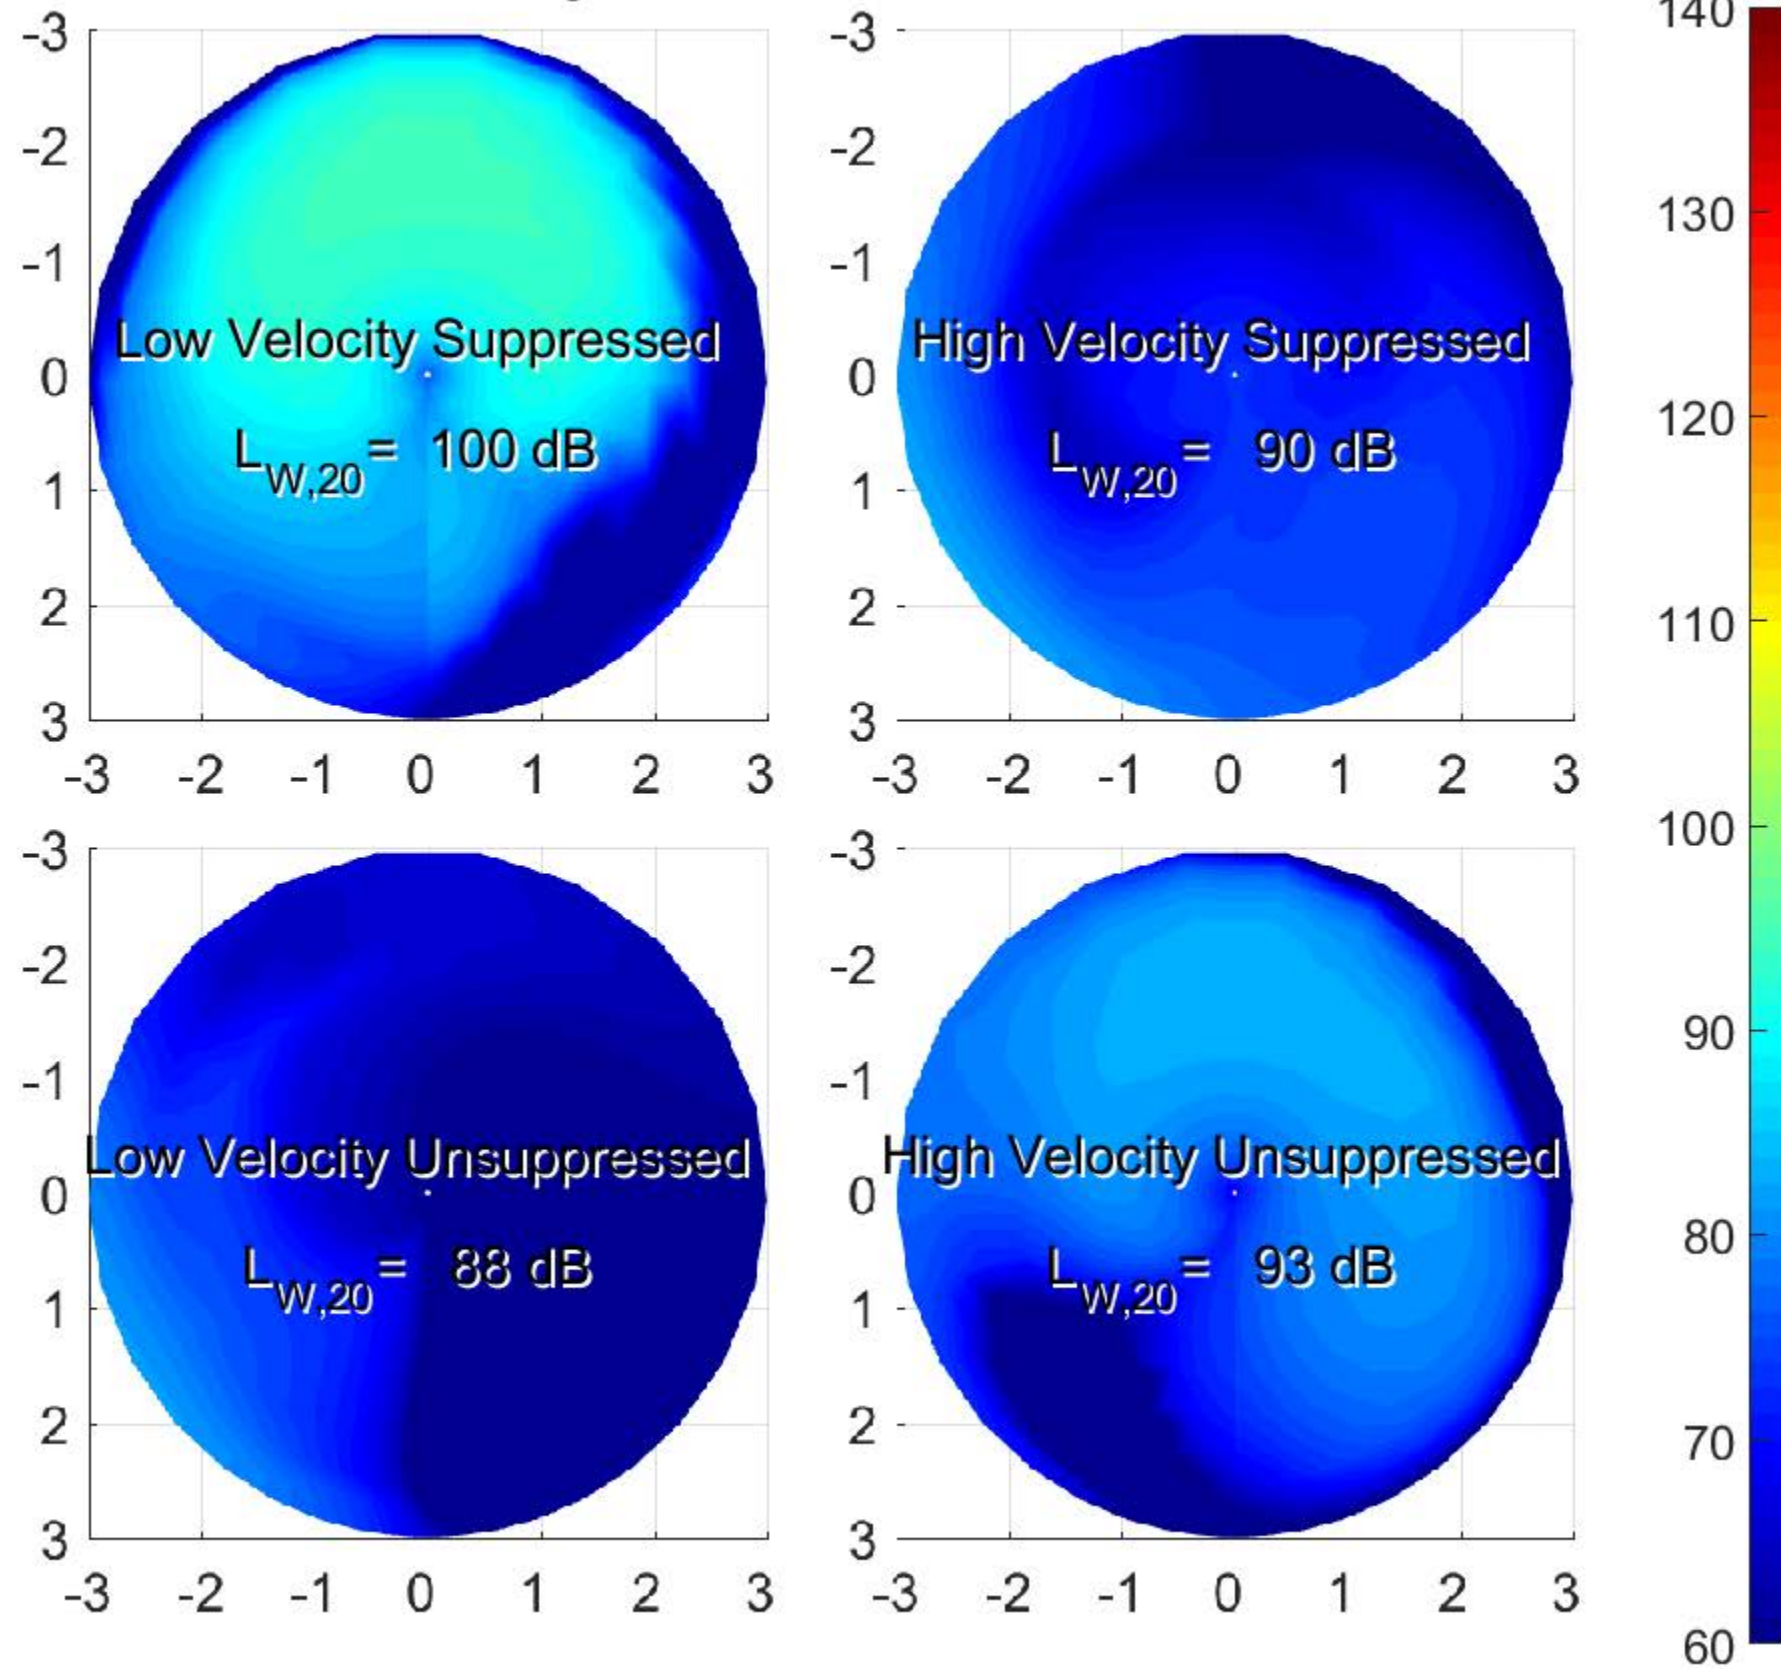

# Ruger .22 cal Pistol 25 Hz

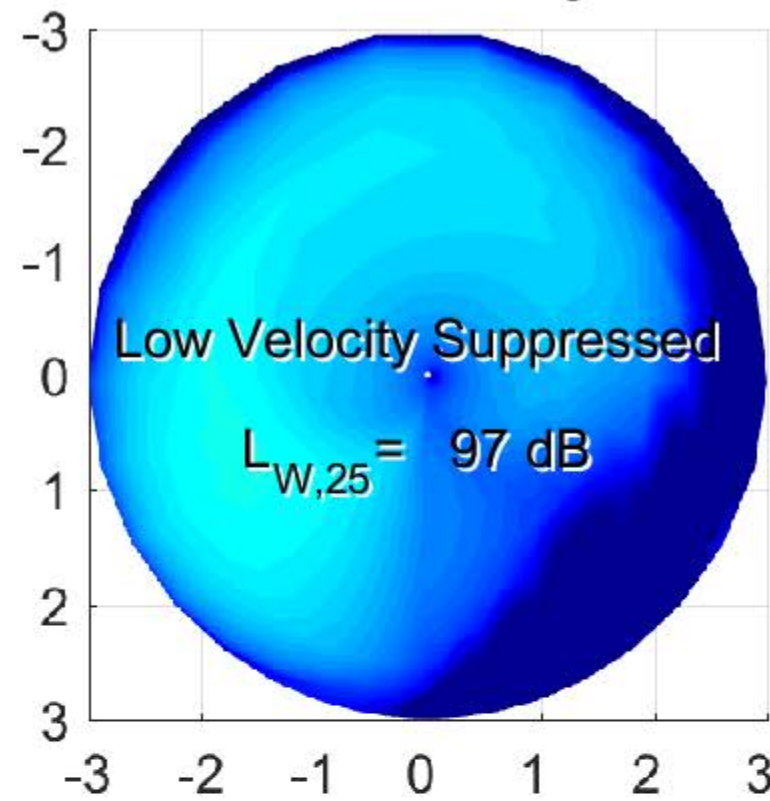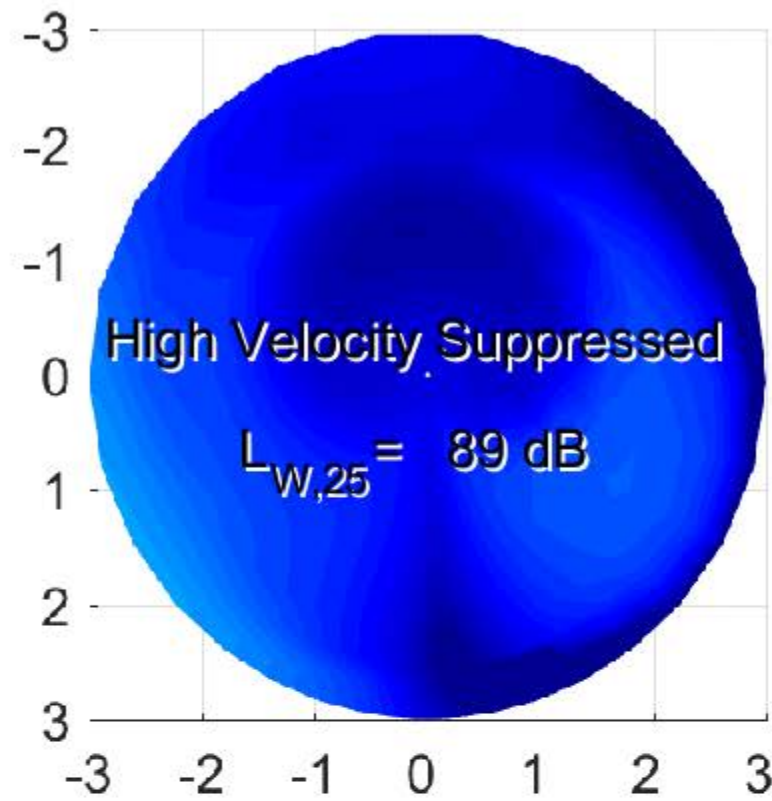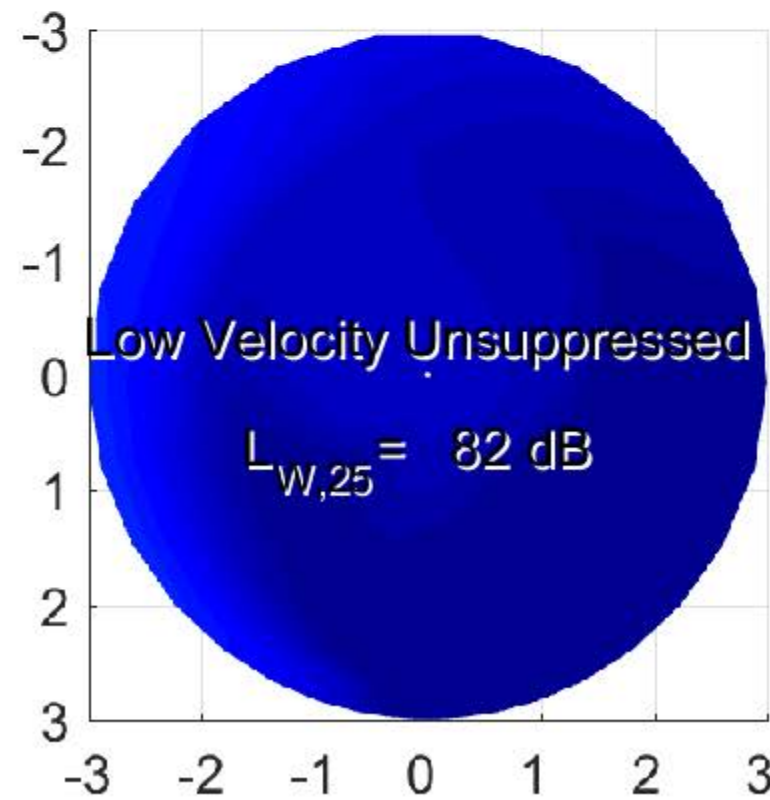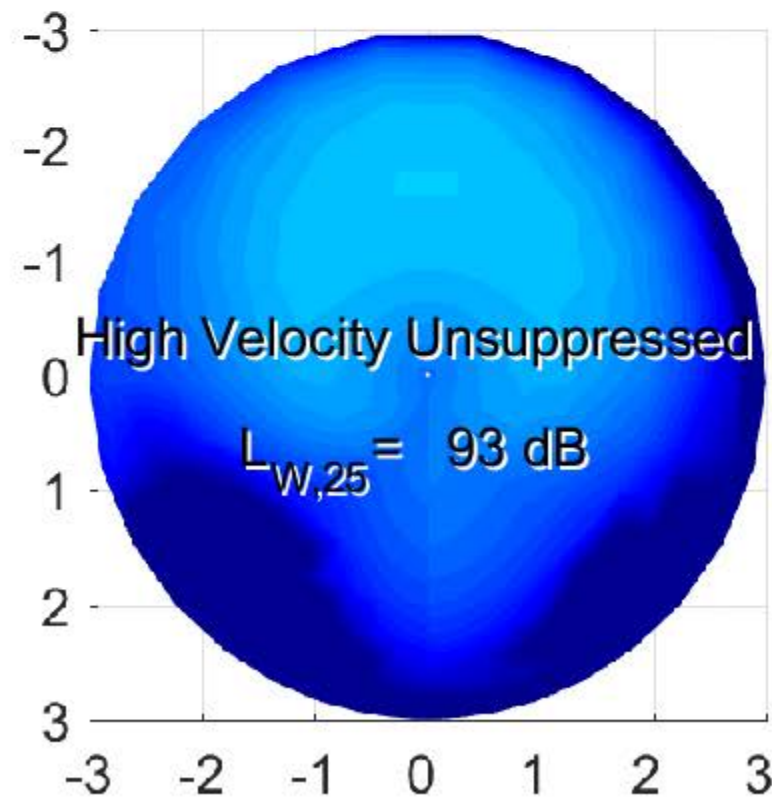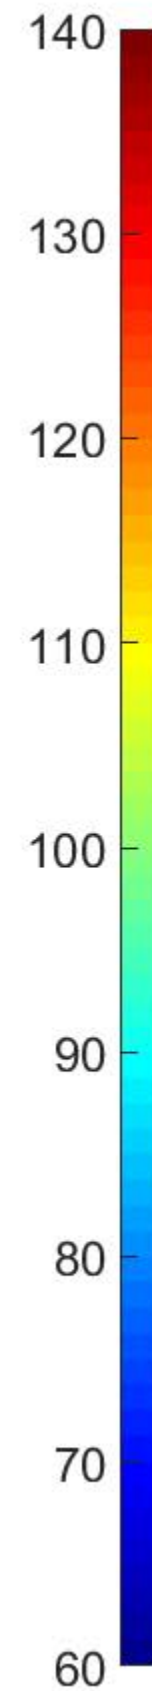

# Ruger .22 cal Pistol 32 Hz

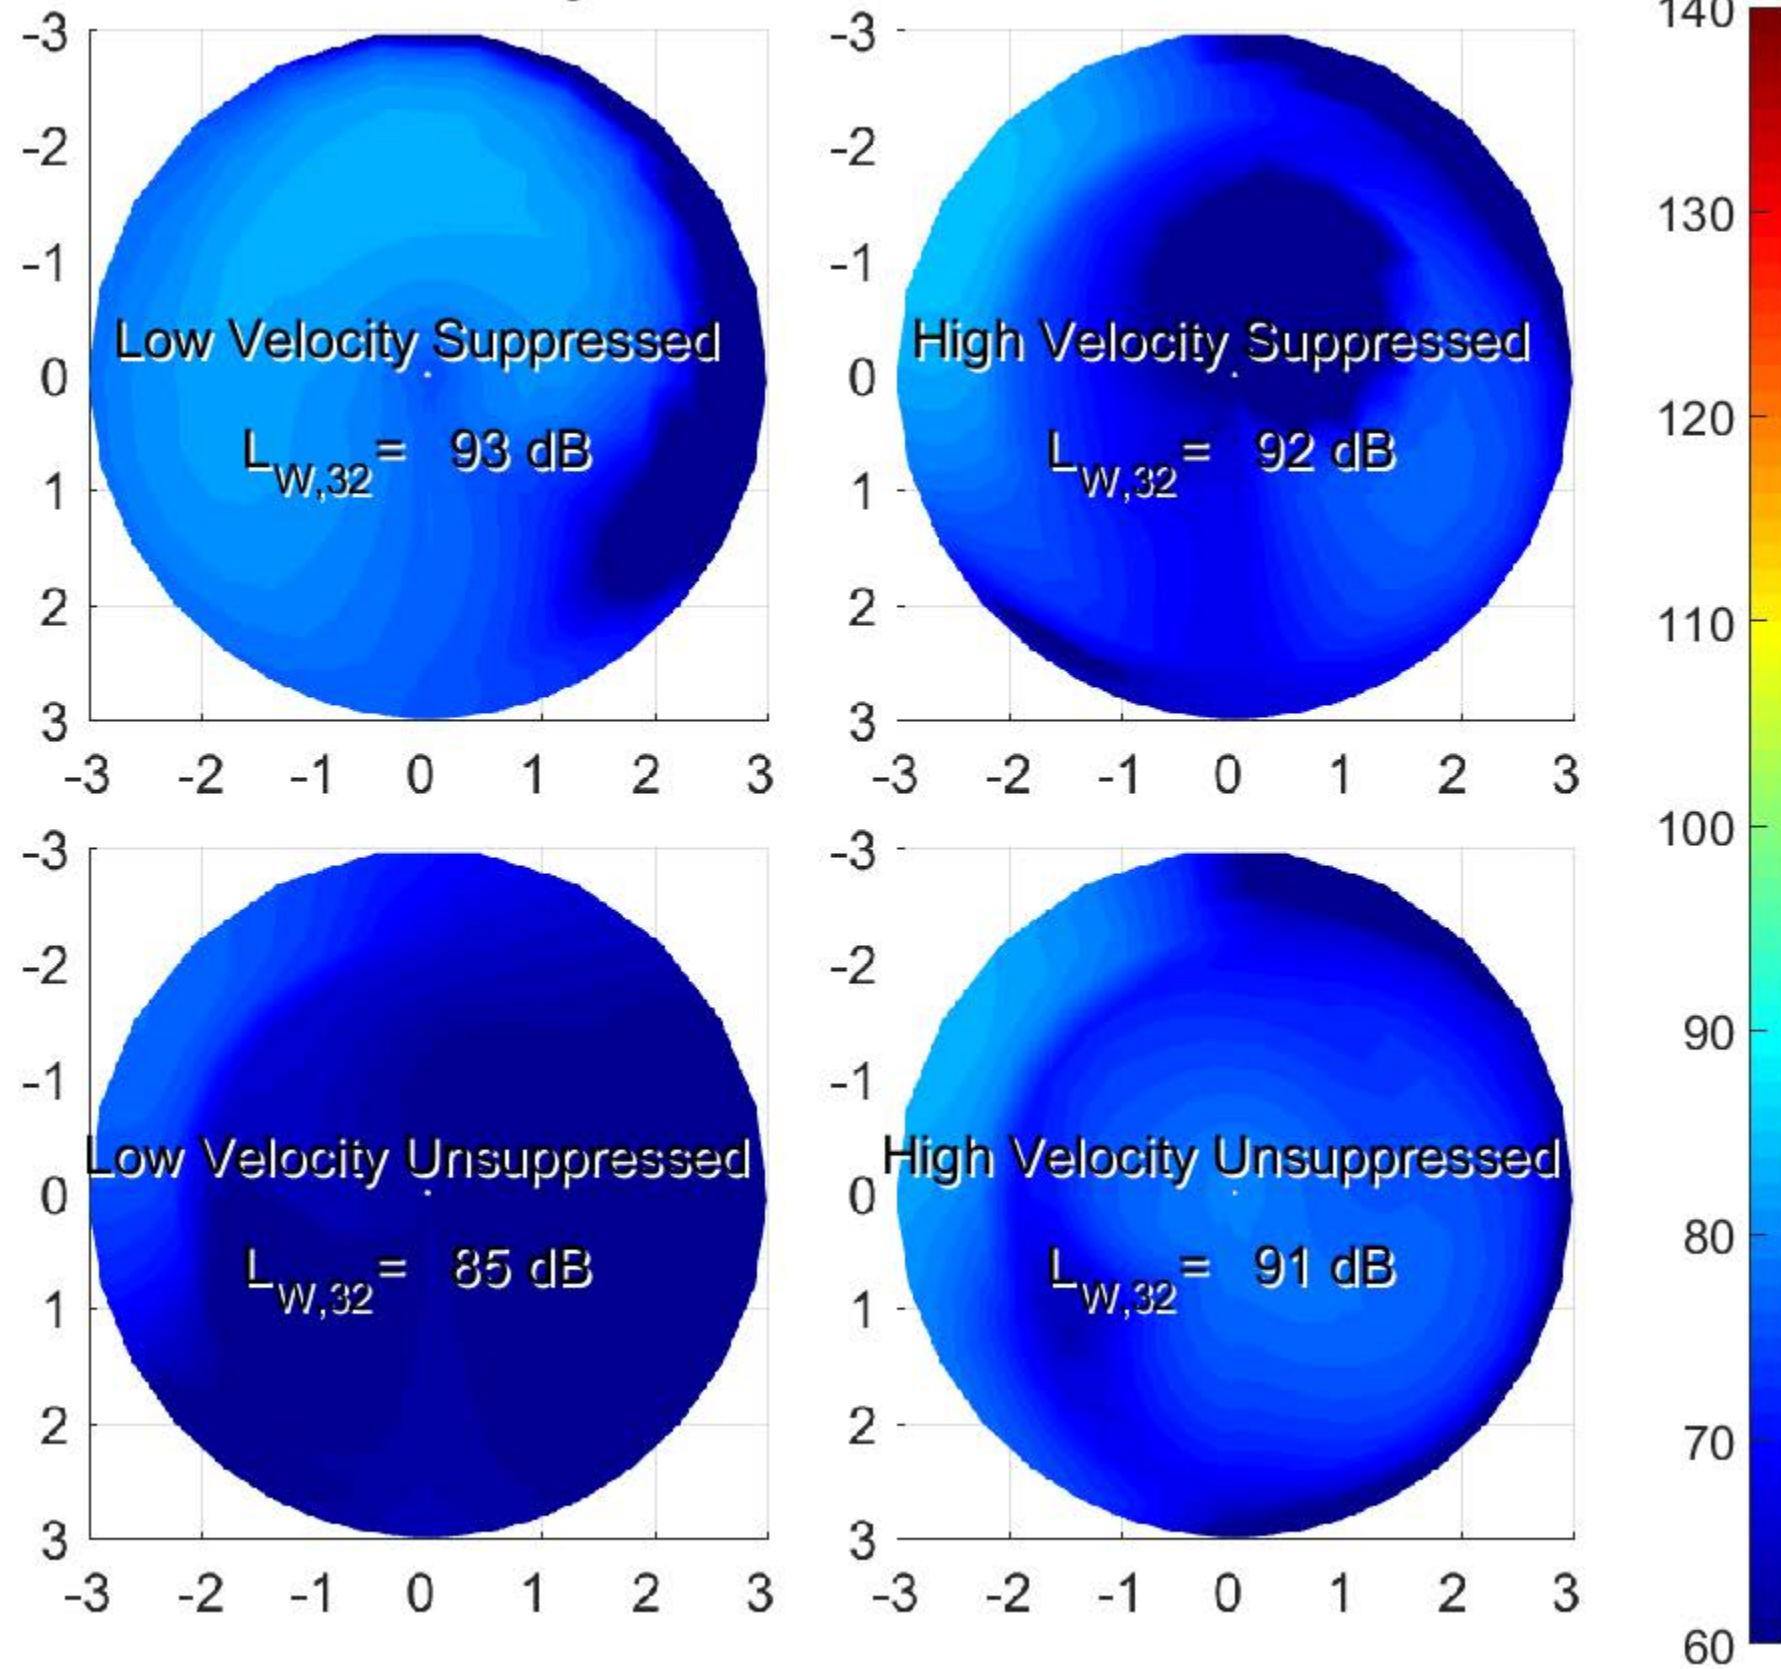

# Ruger .22 cal Pistol 40 Hz

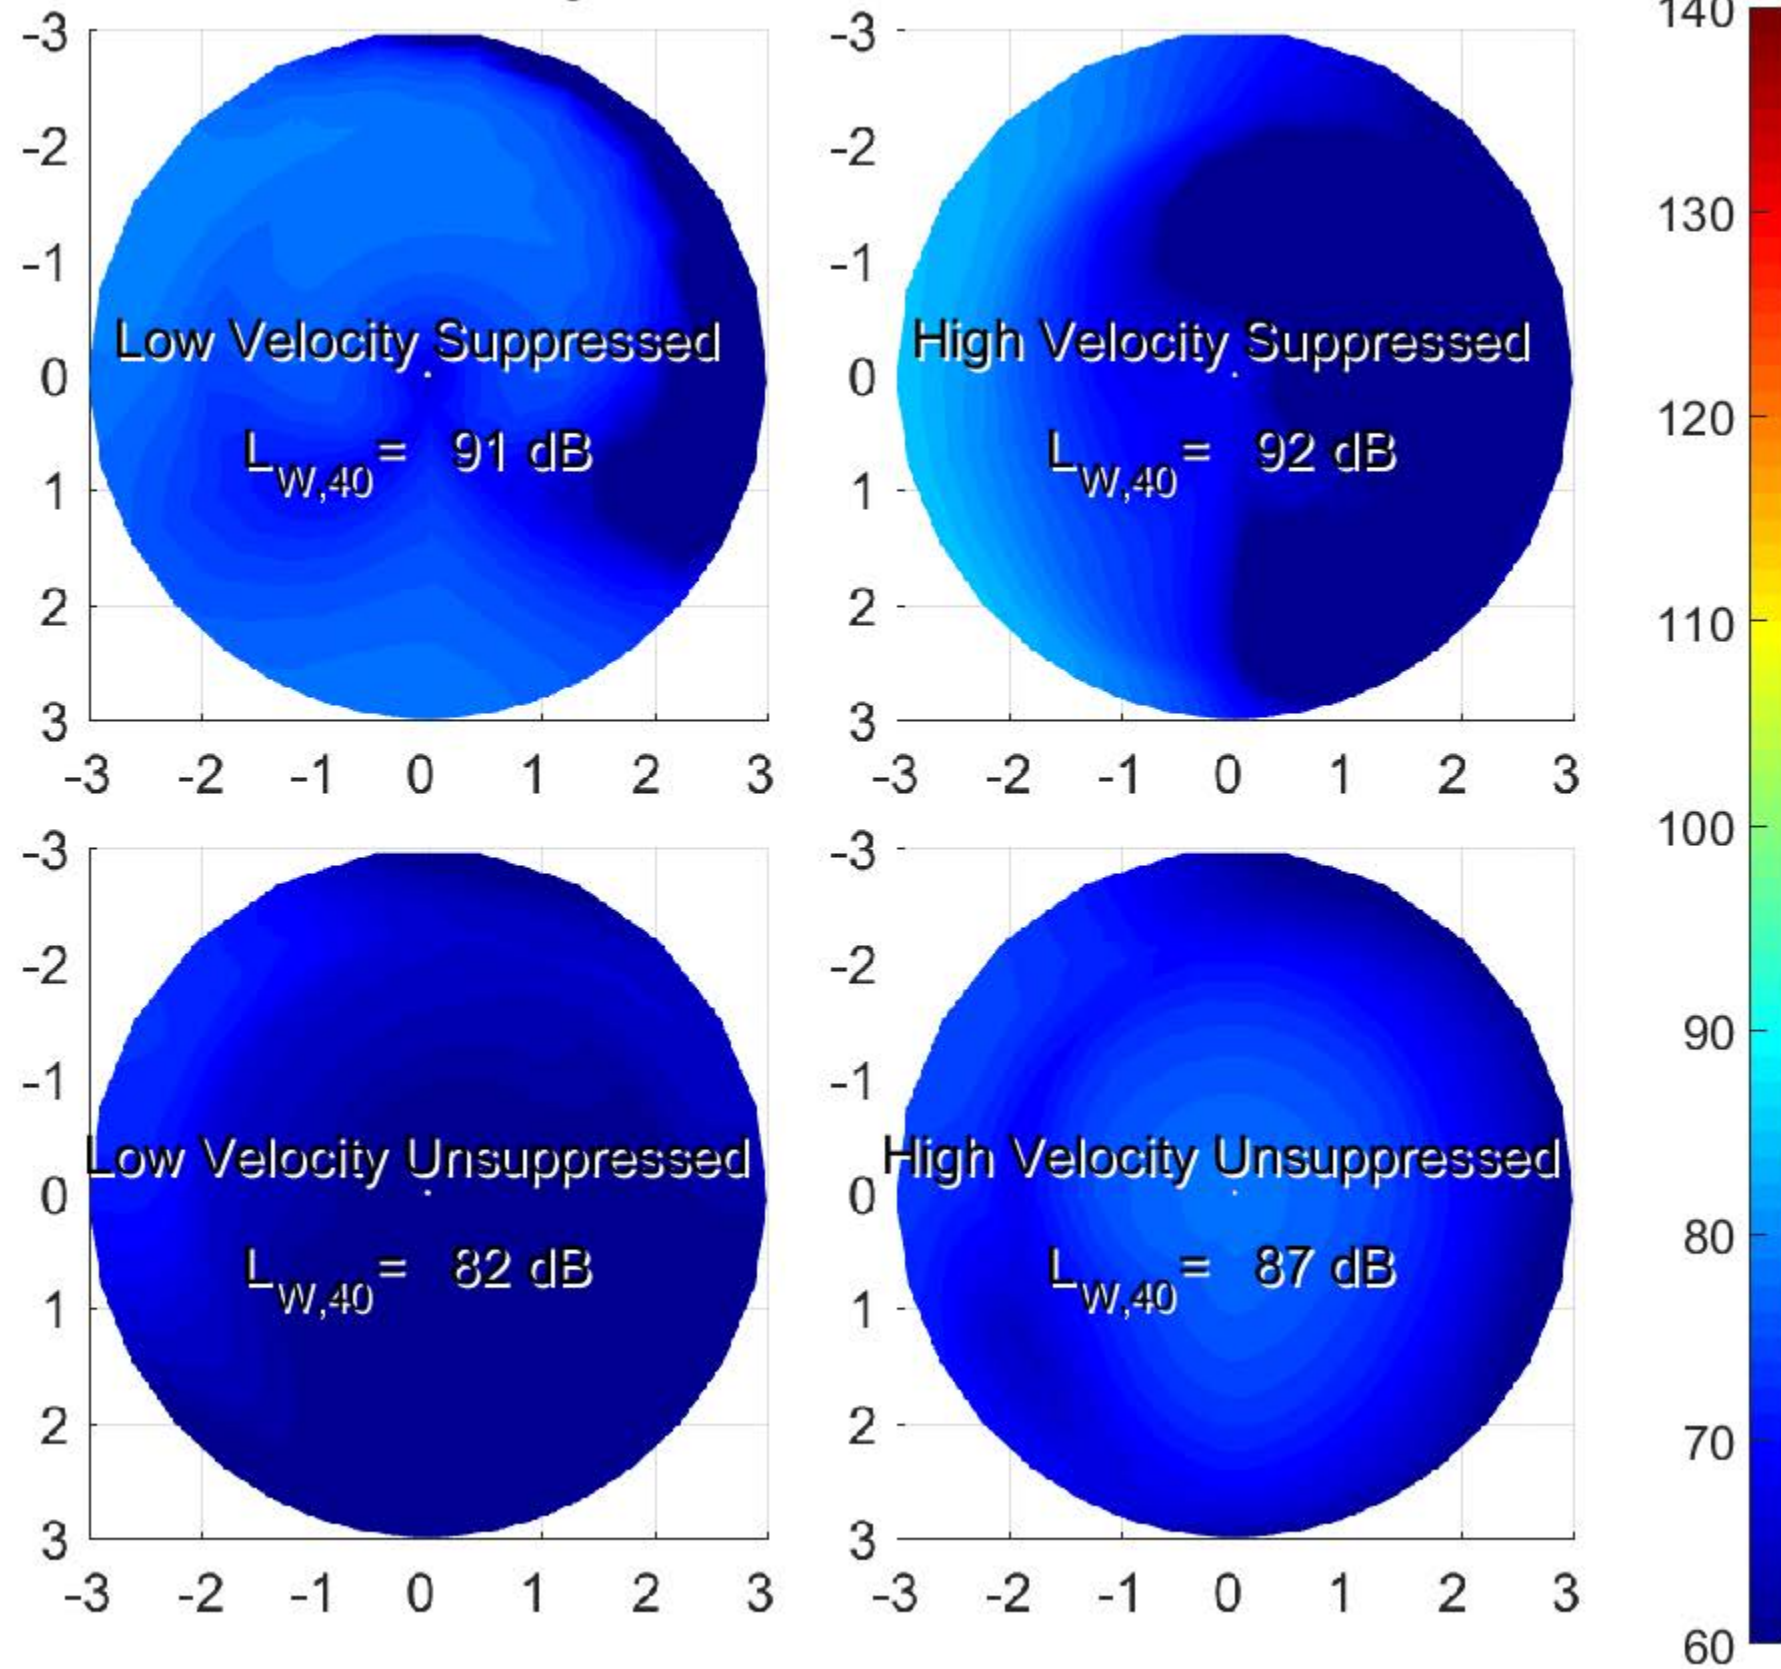

# Ruger .22 cal Pistol 50 Hz

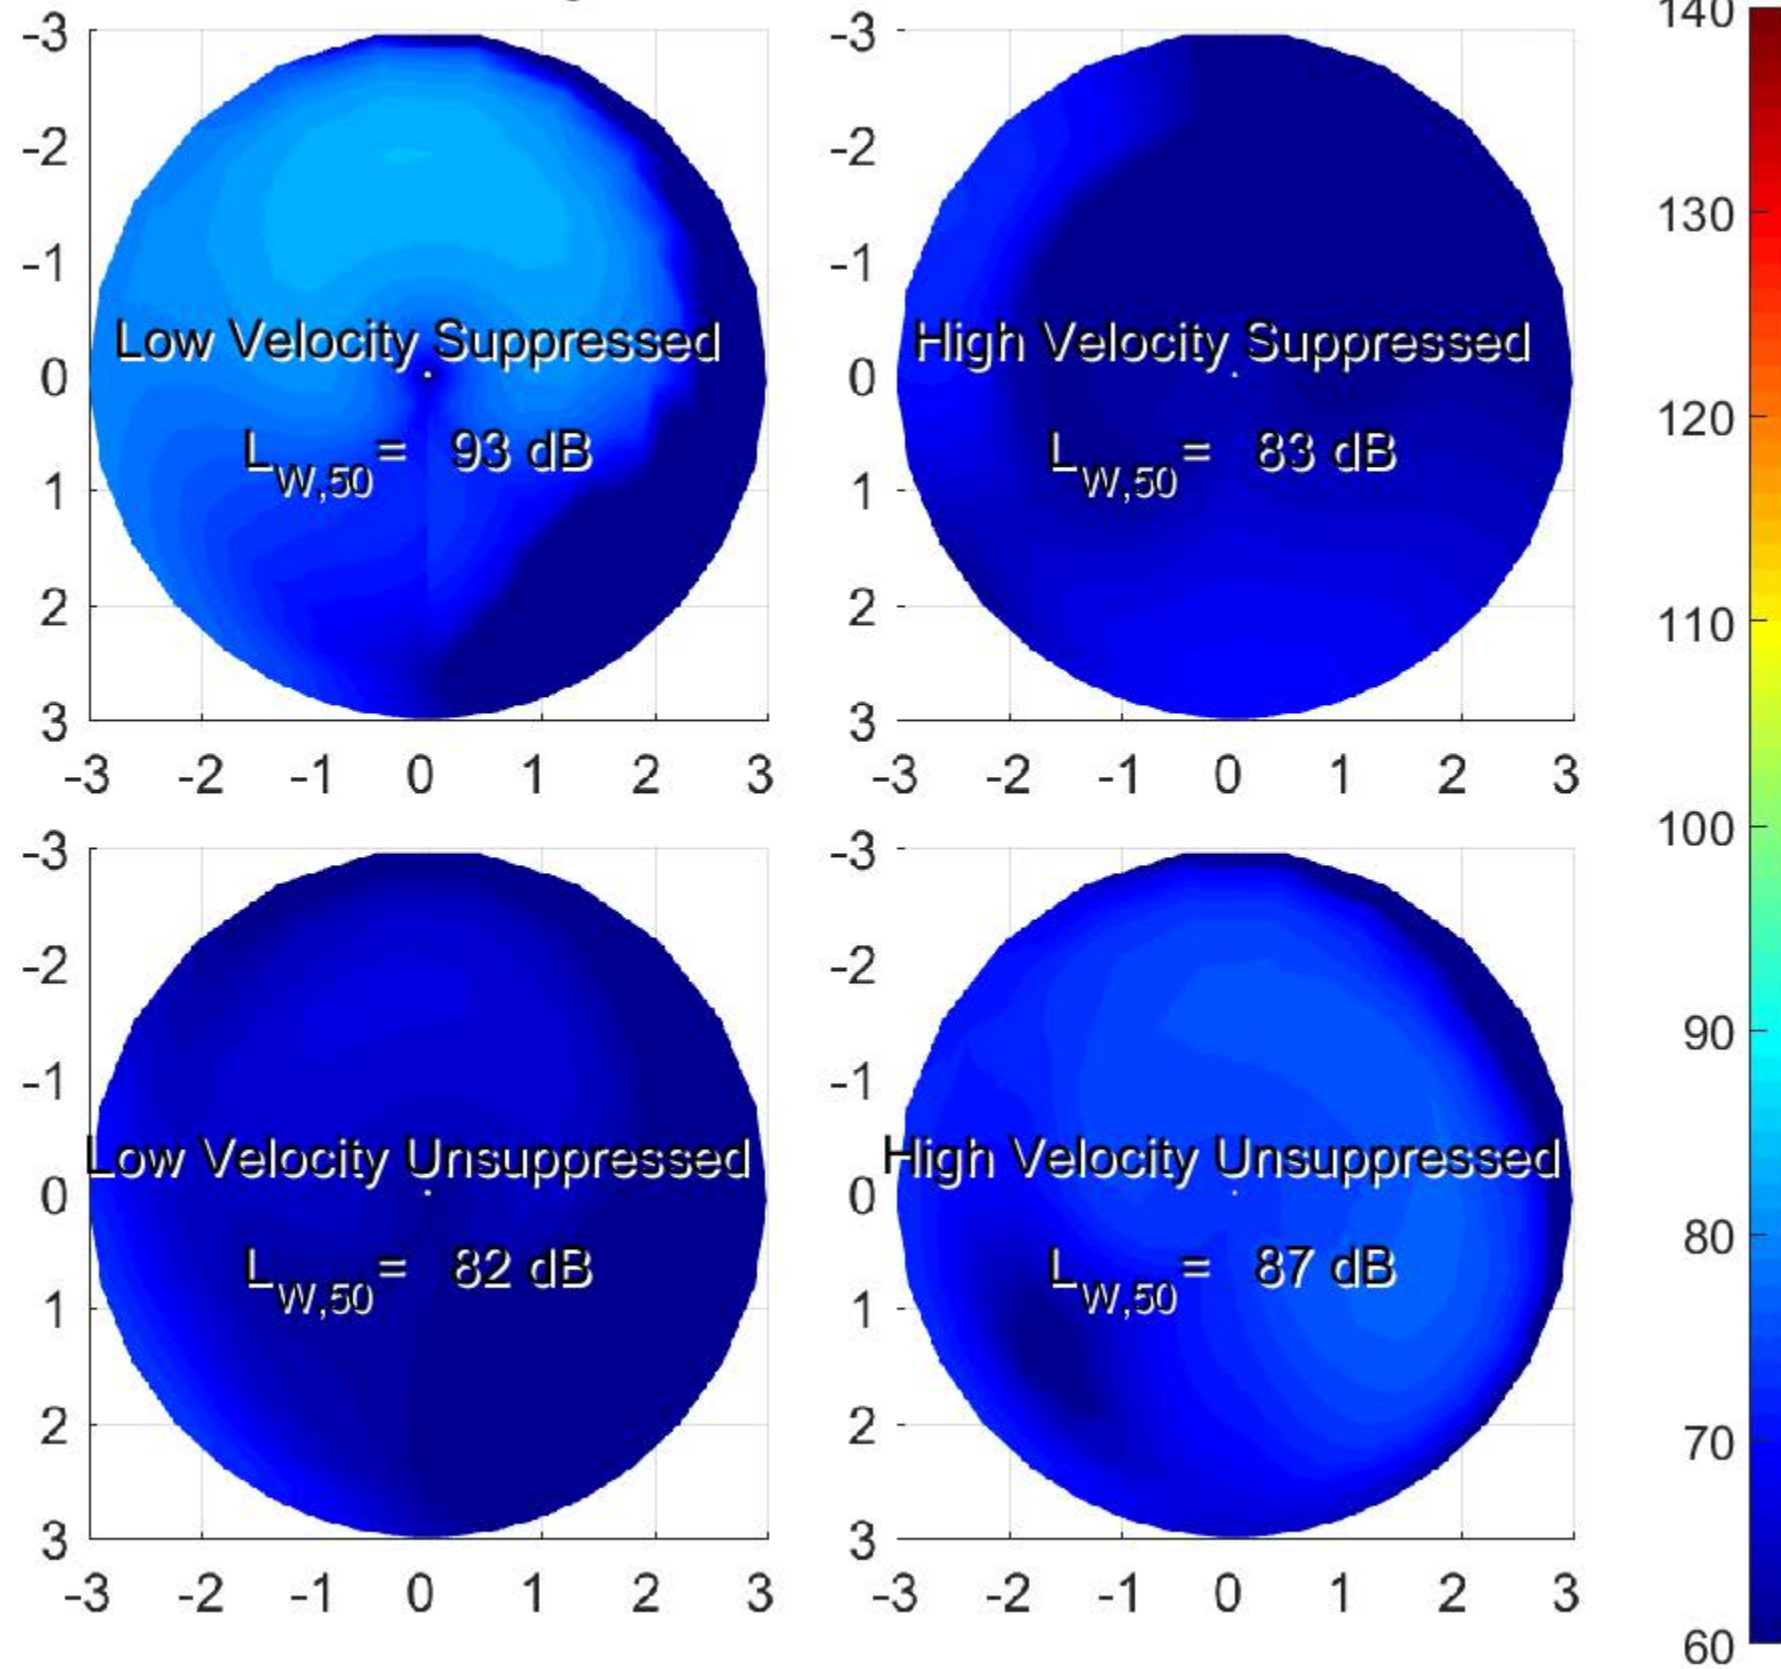

# Ruger .22 cal Pistol 63 Hz

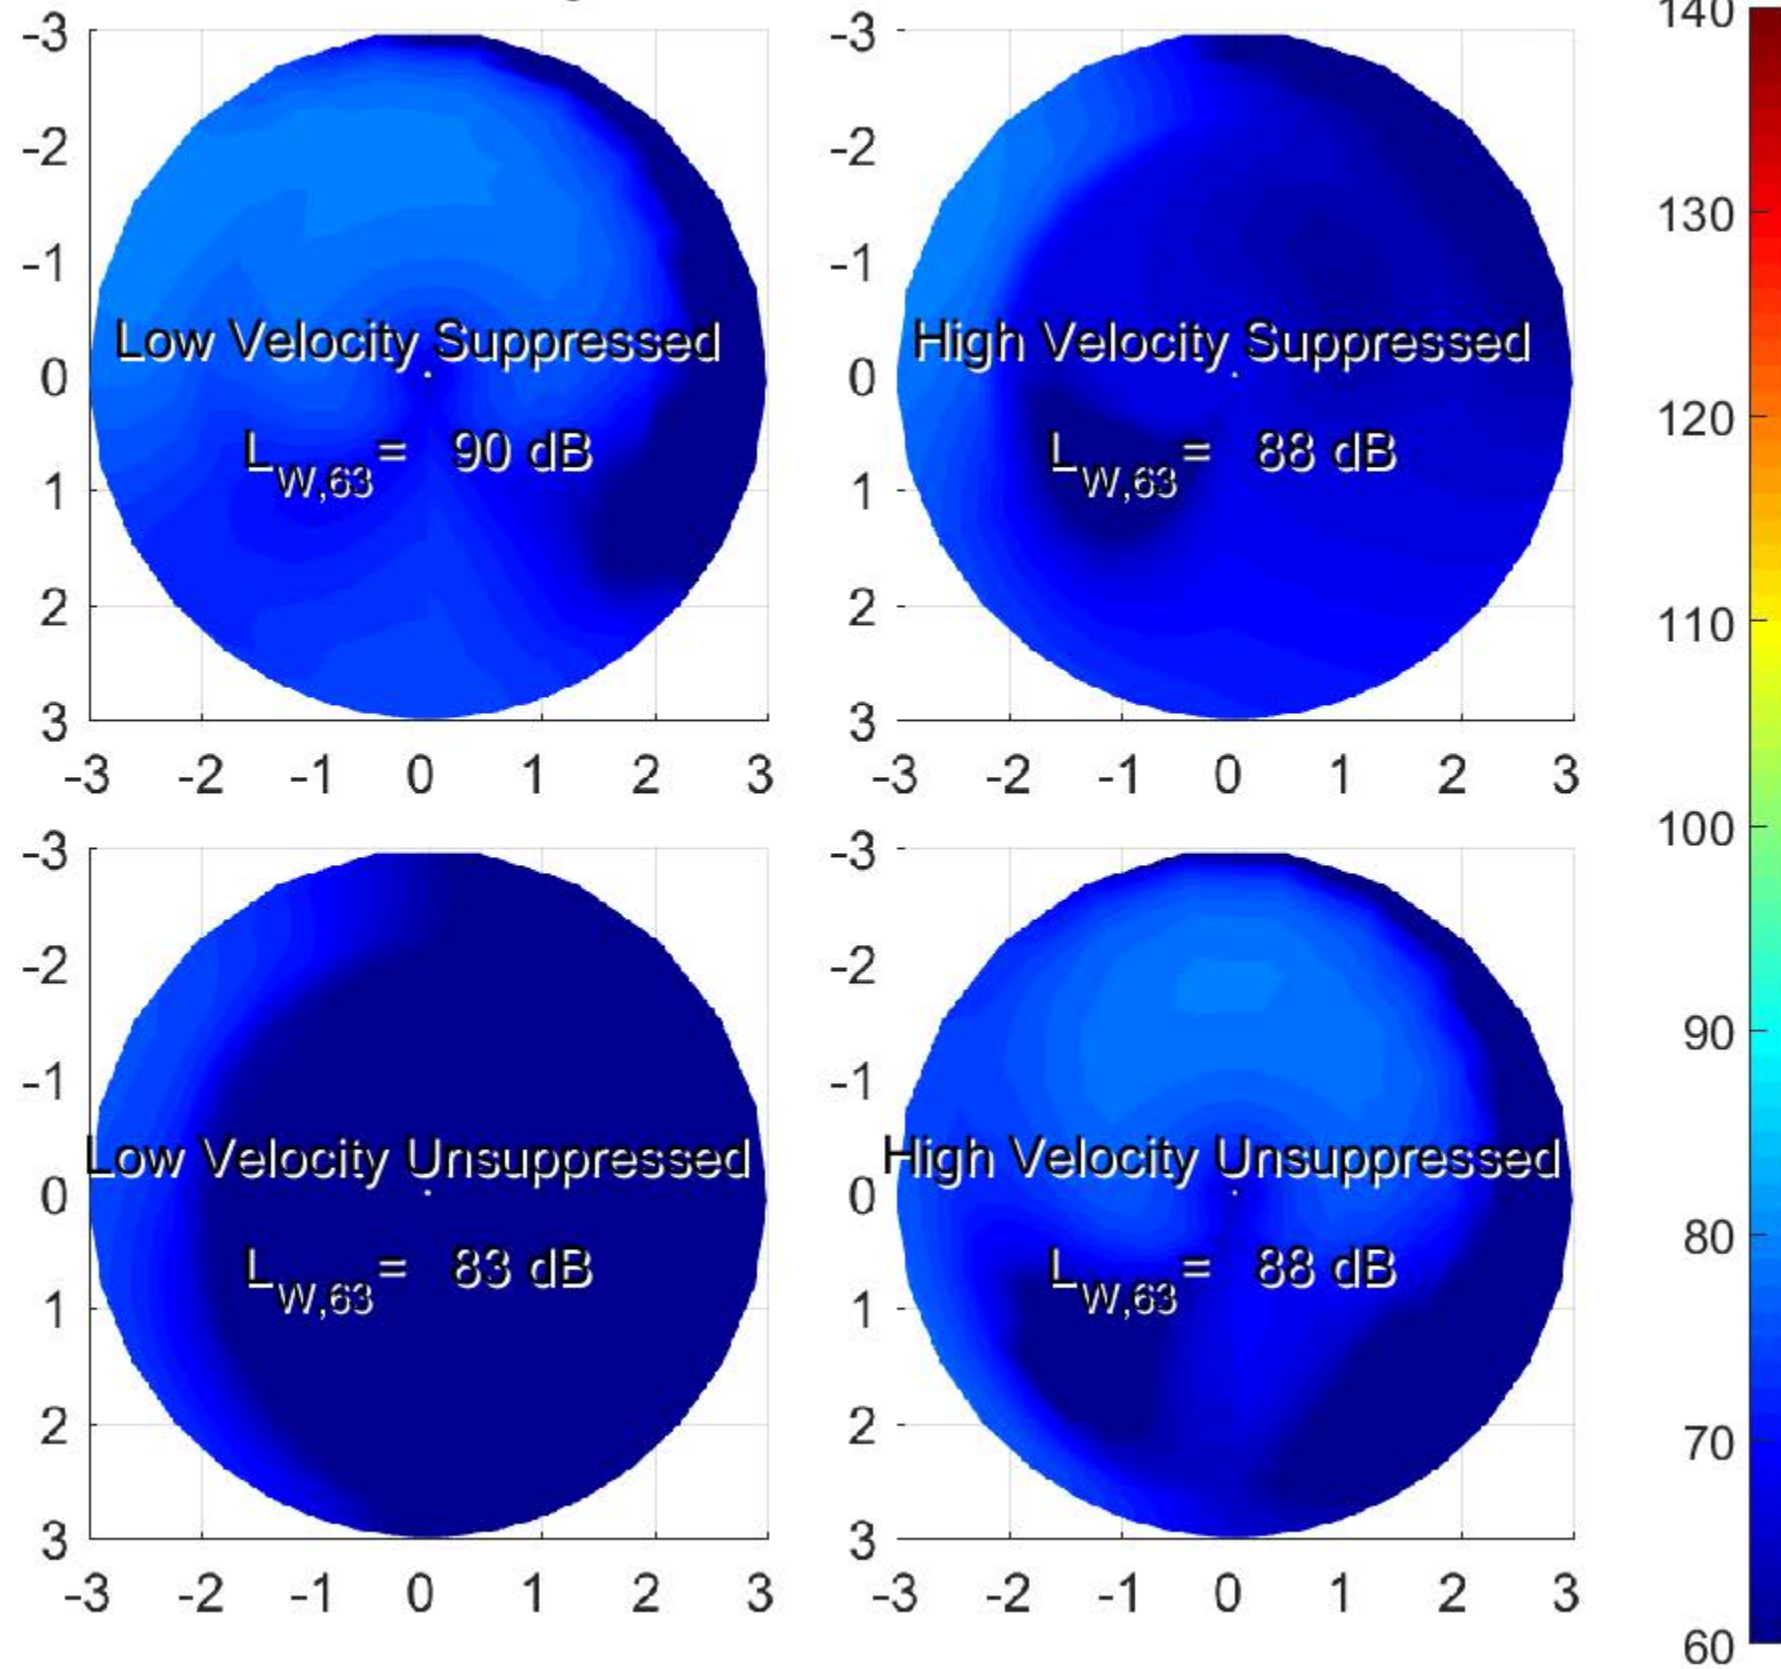

# Ruger .22 cal Pistol 80 Hz

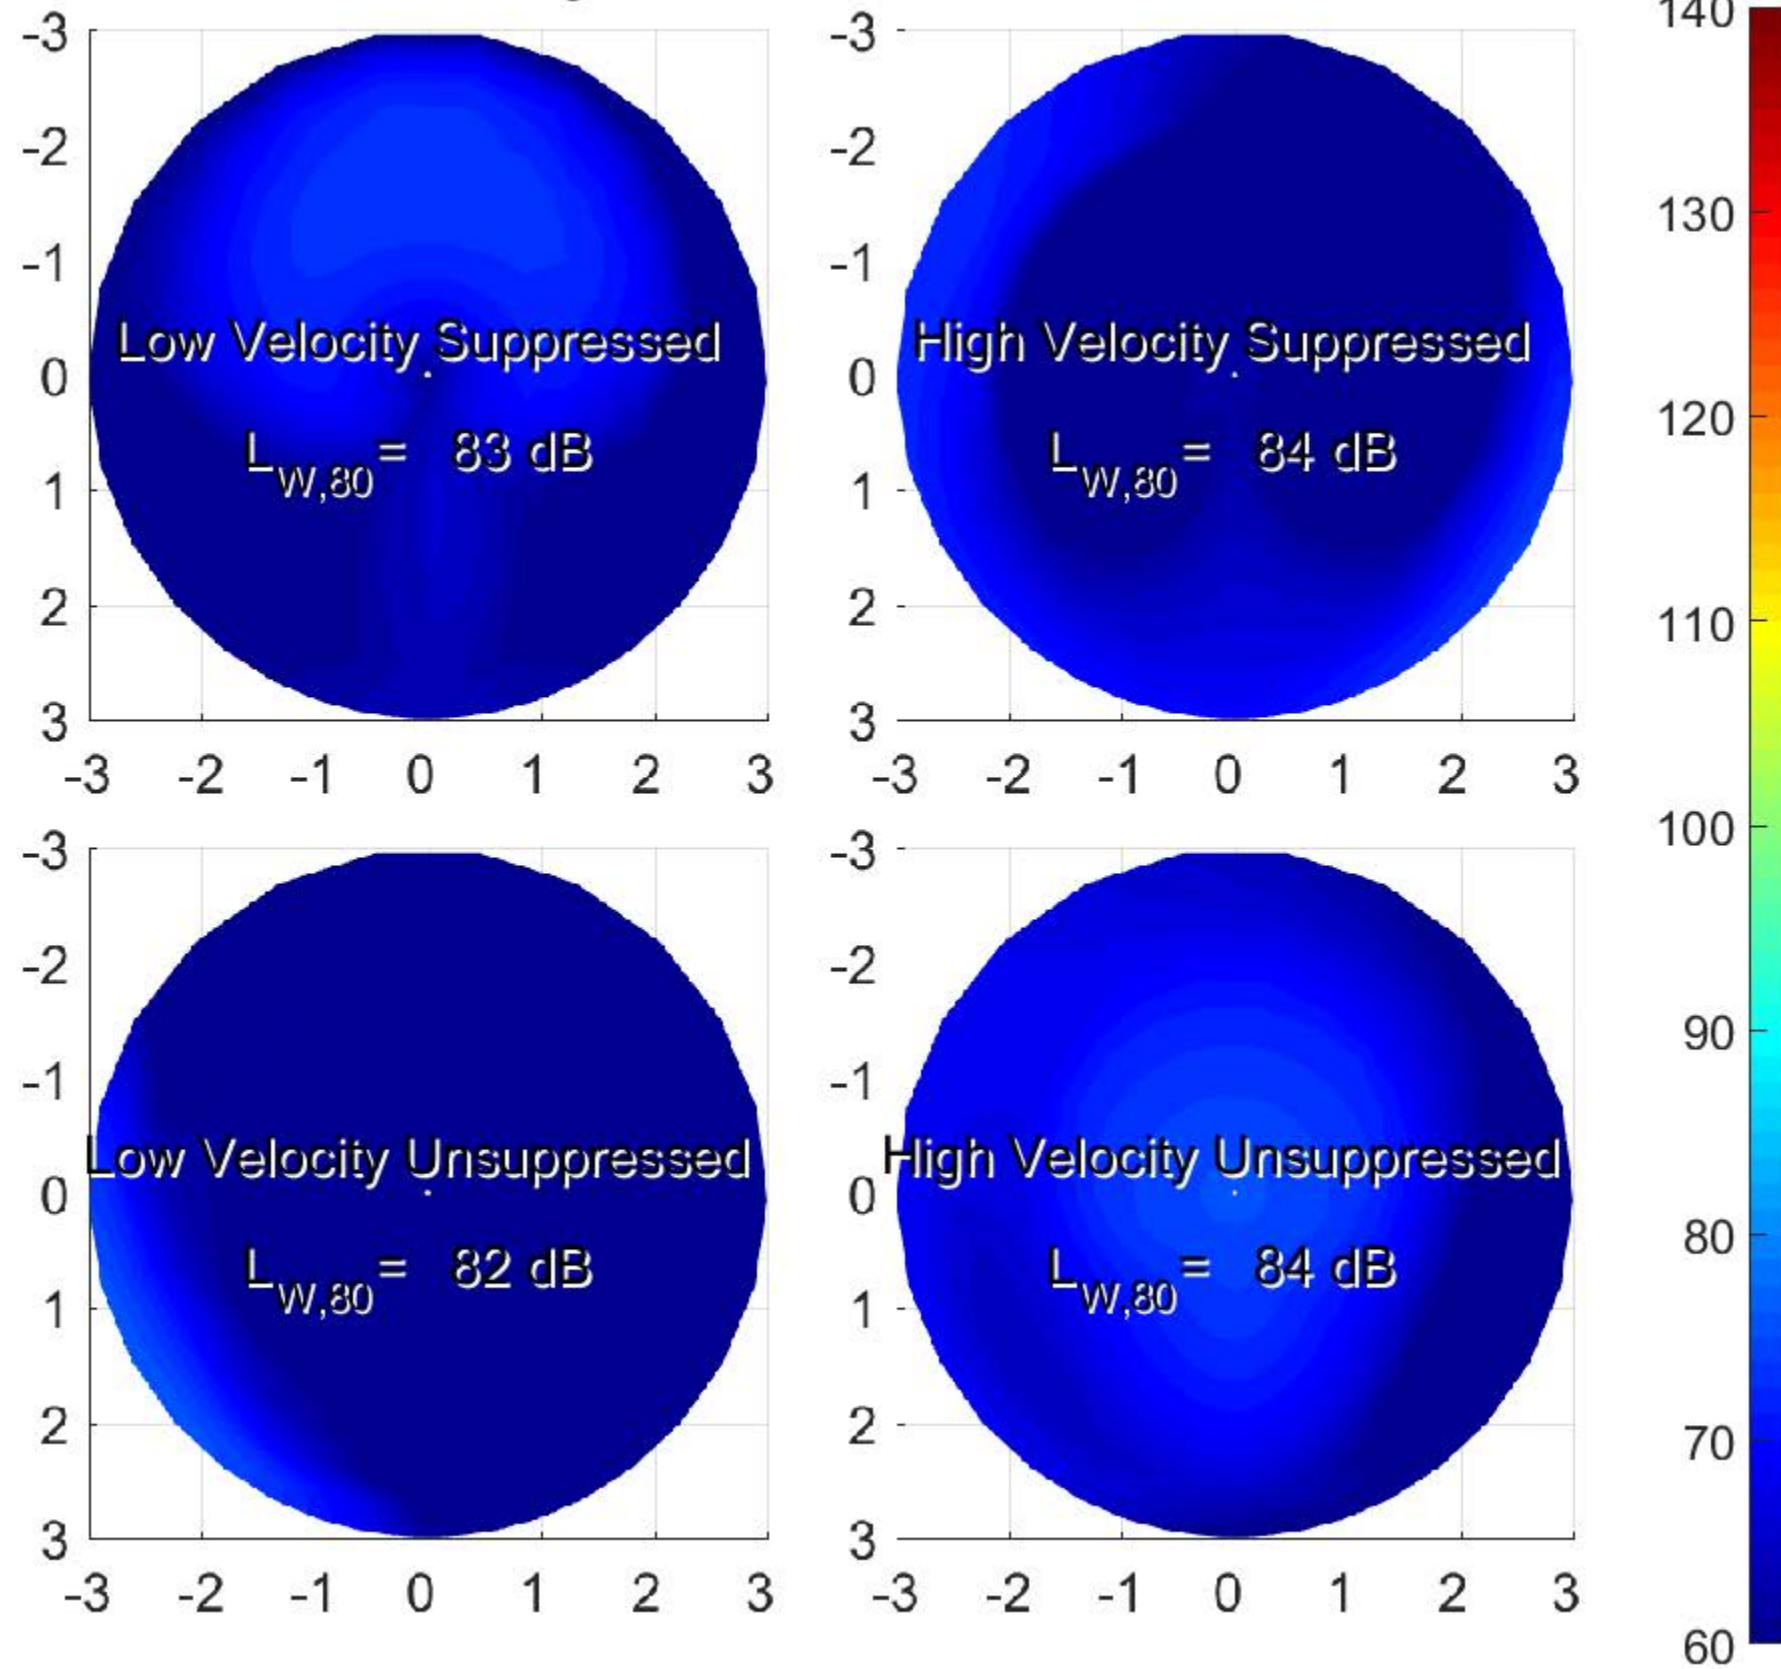

# Ruger .22 cal Pistol 100 Hz

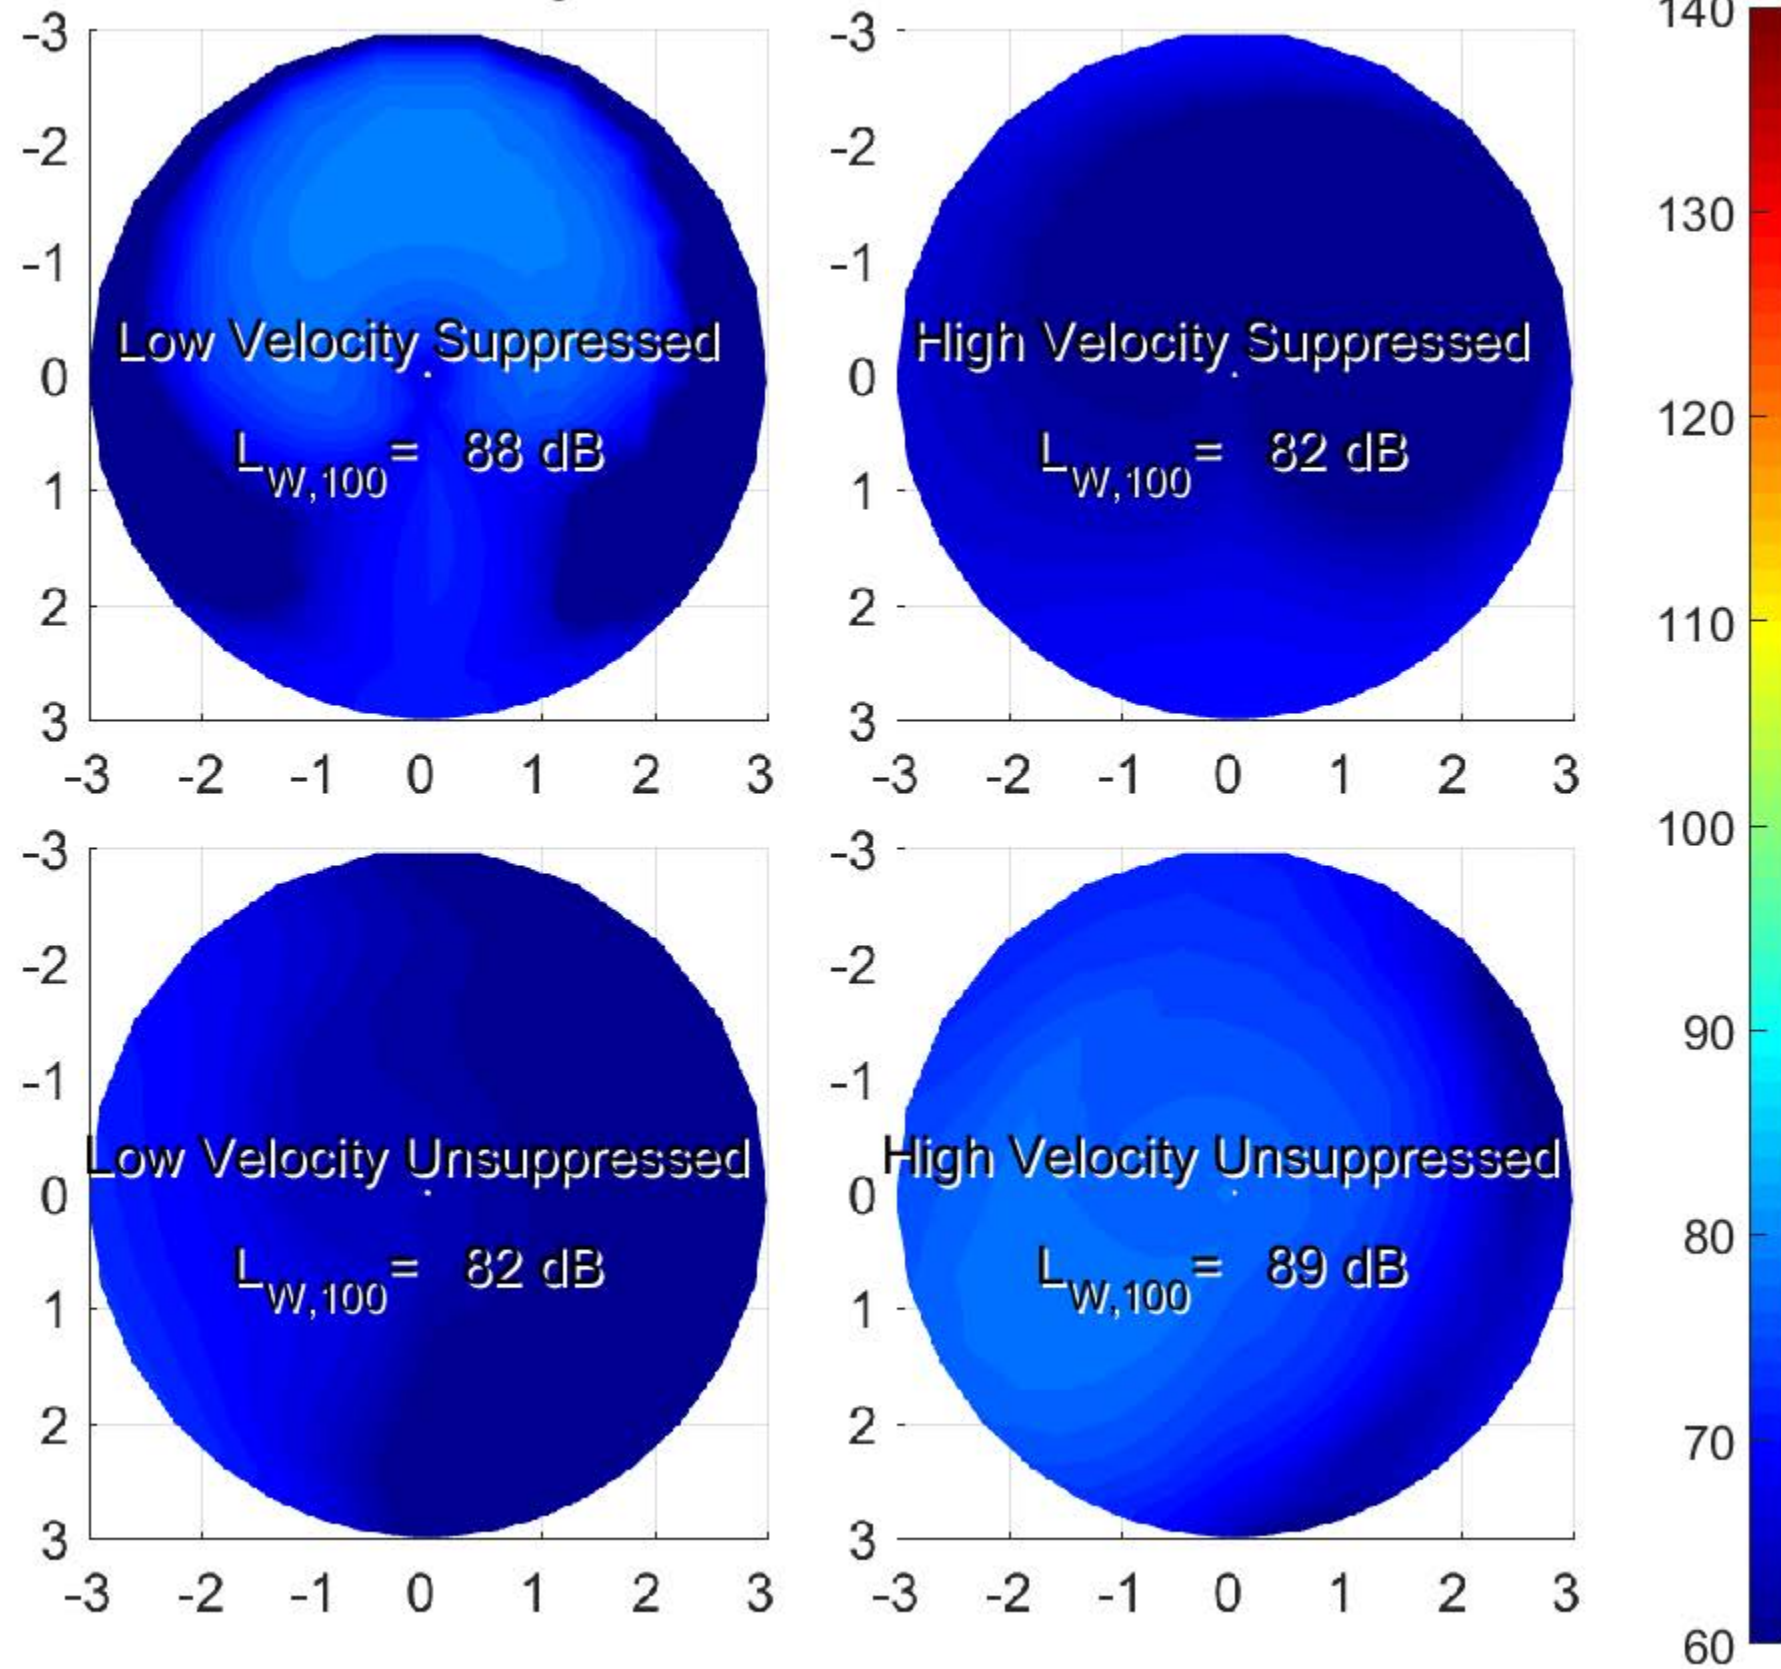

# Ruger .22 cal Pistol 125 Hz

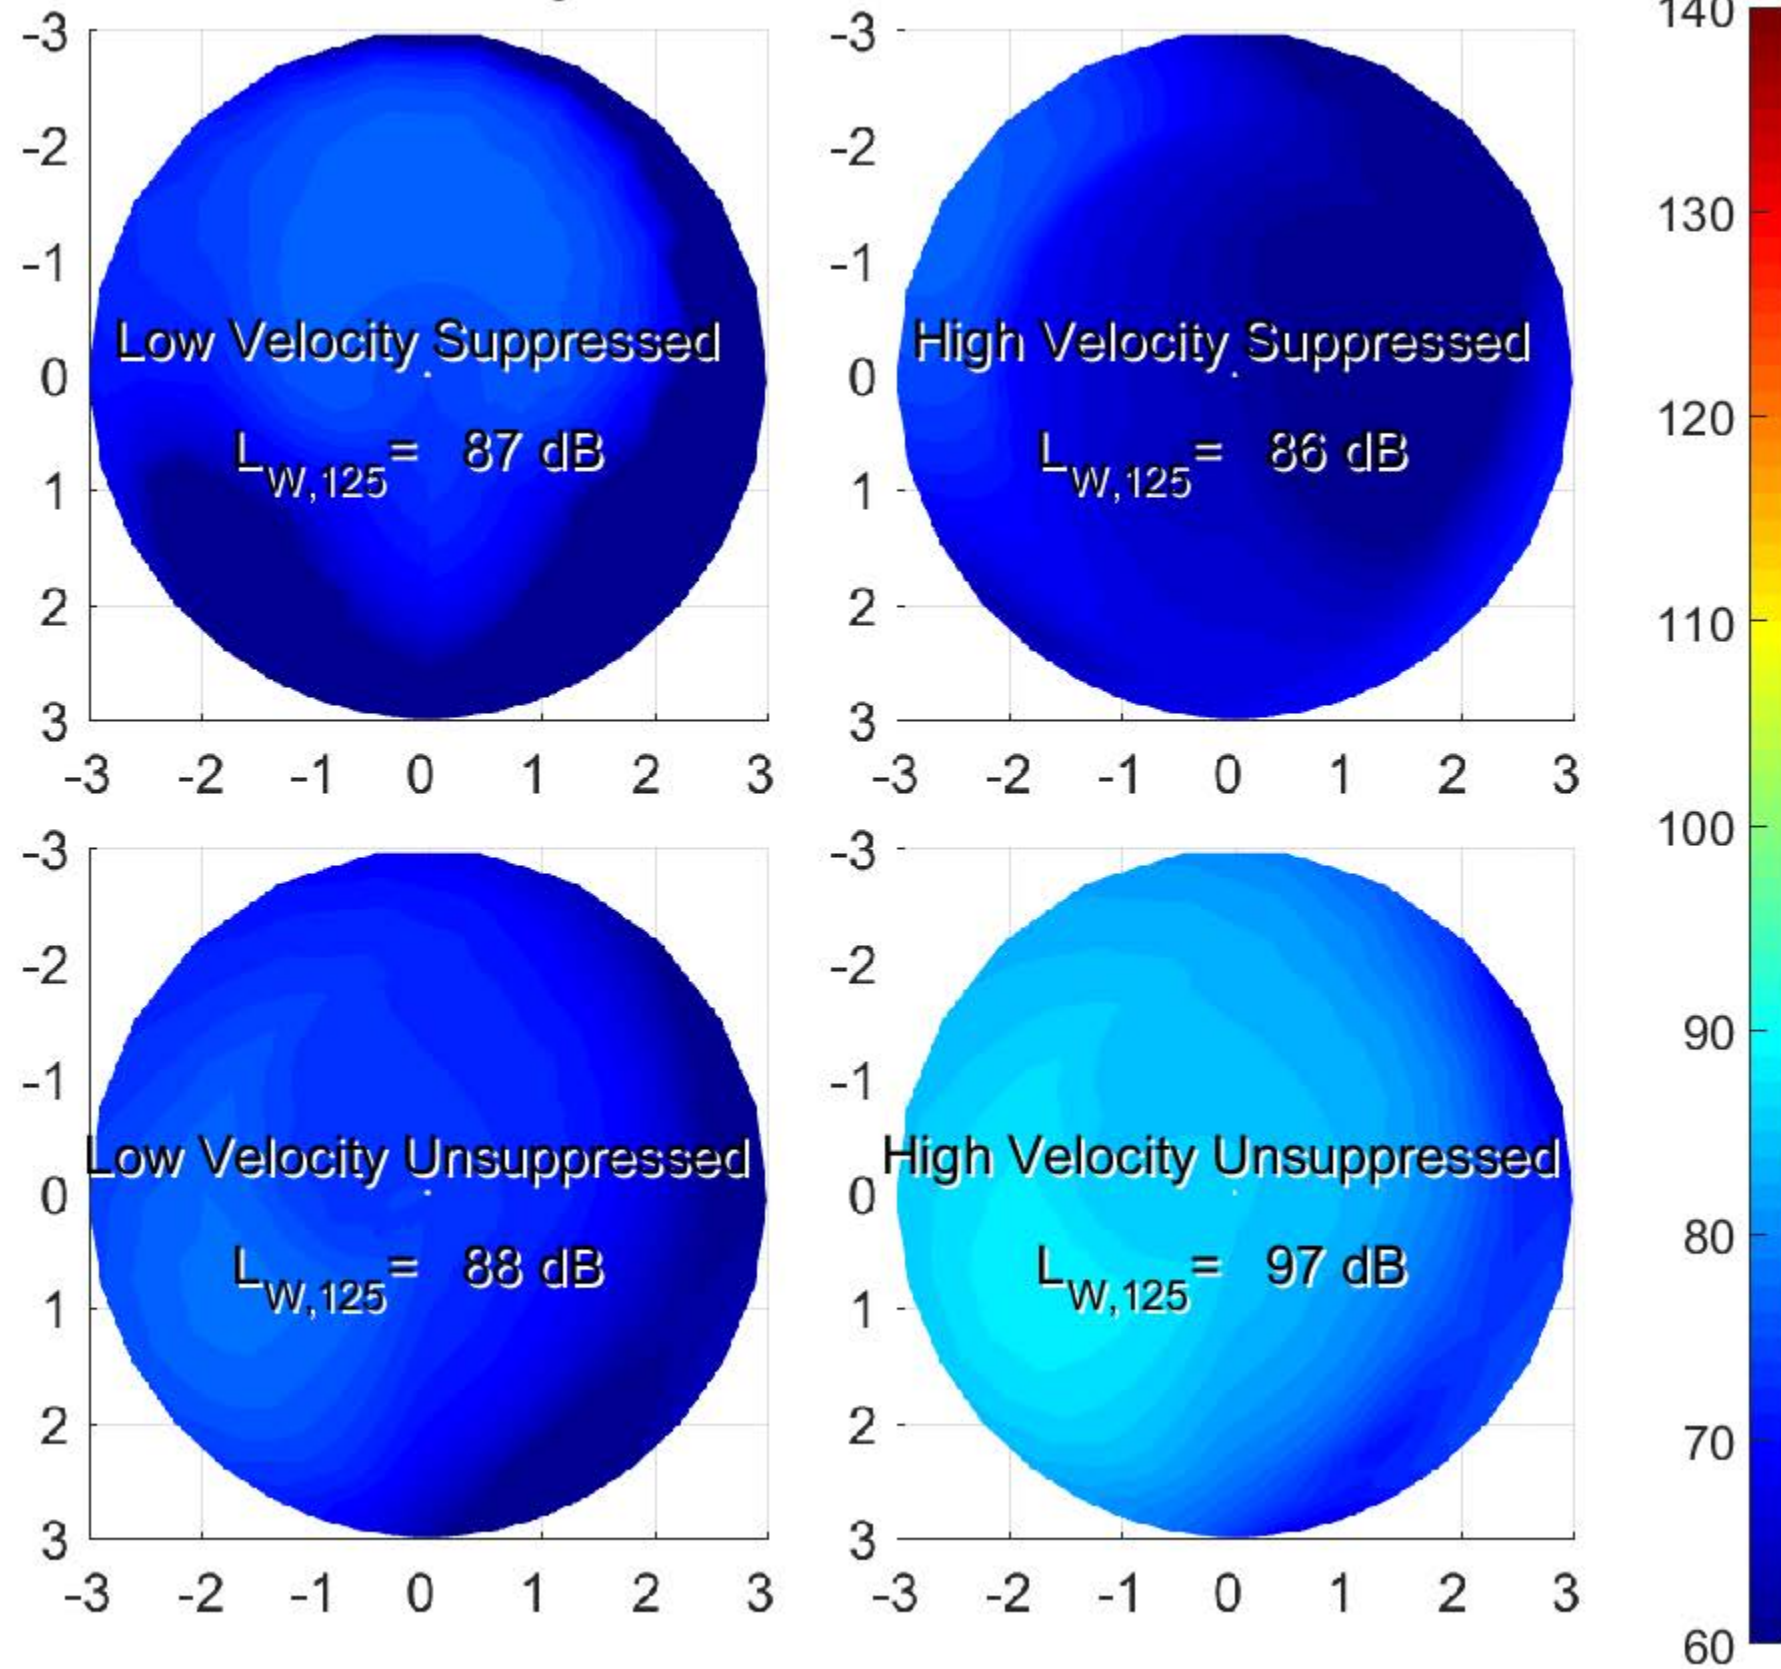

# Ruger .22 cal Pistol 160 Hz

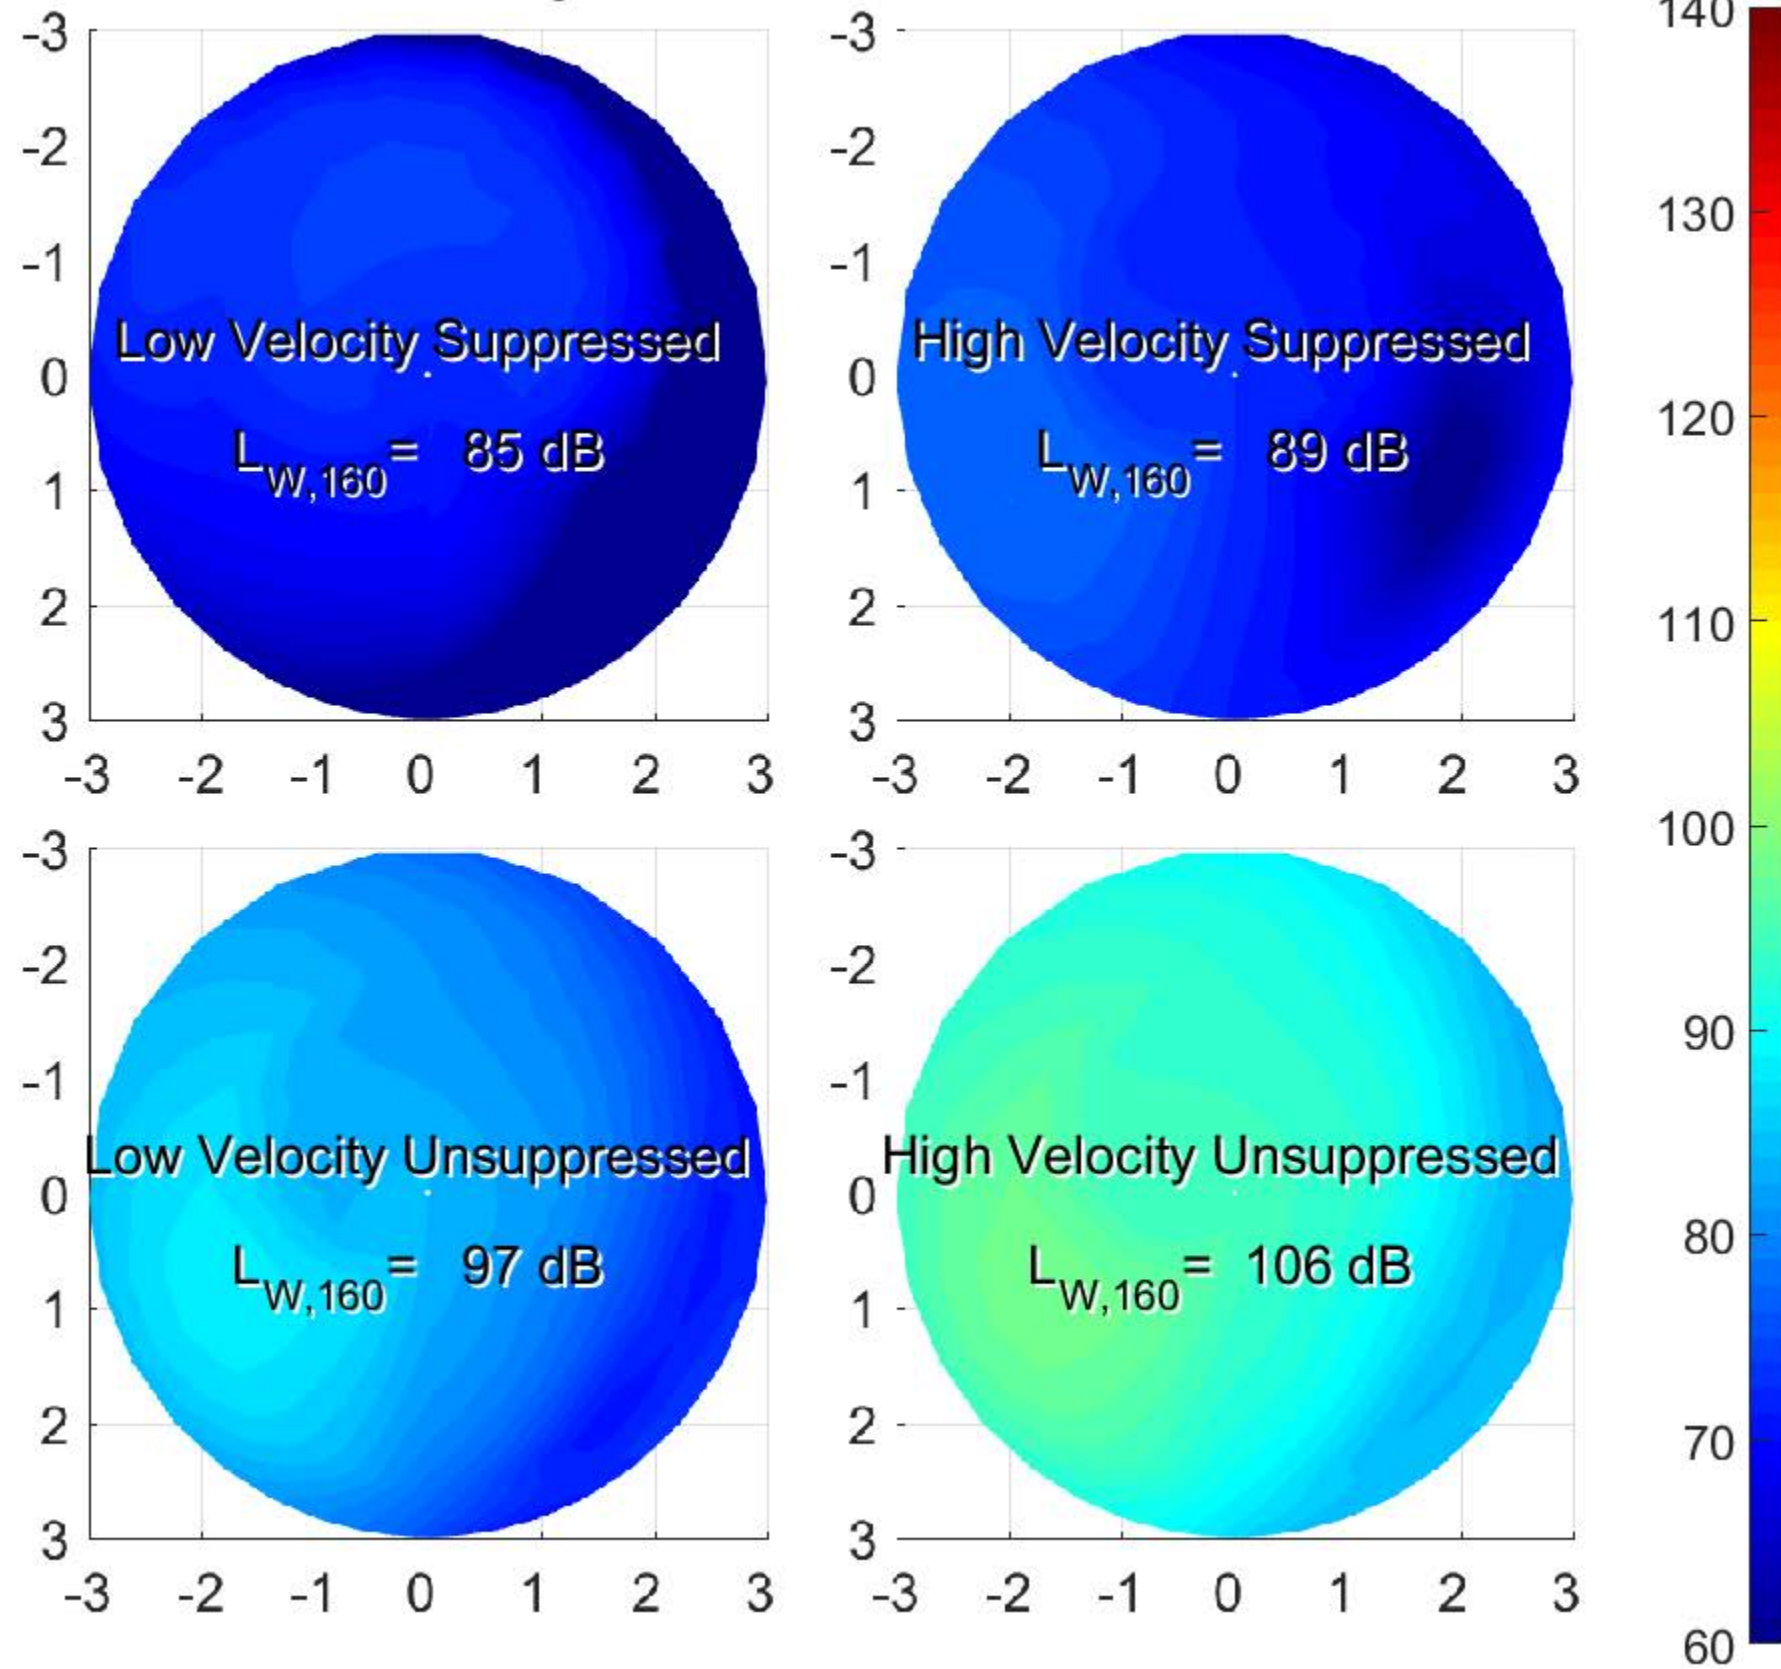

# Ruger .22 cal Pistol 200 Hz

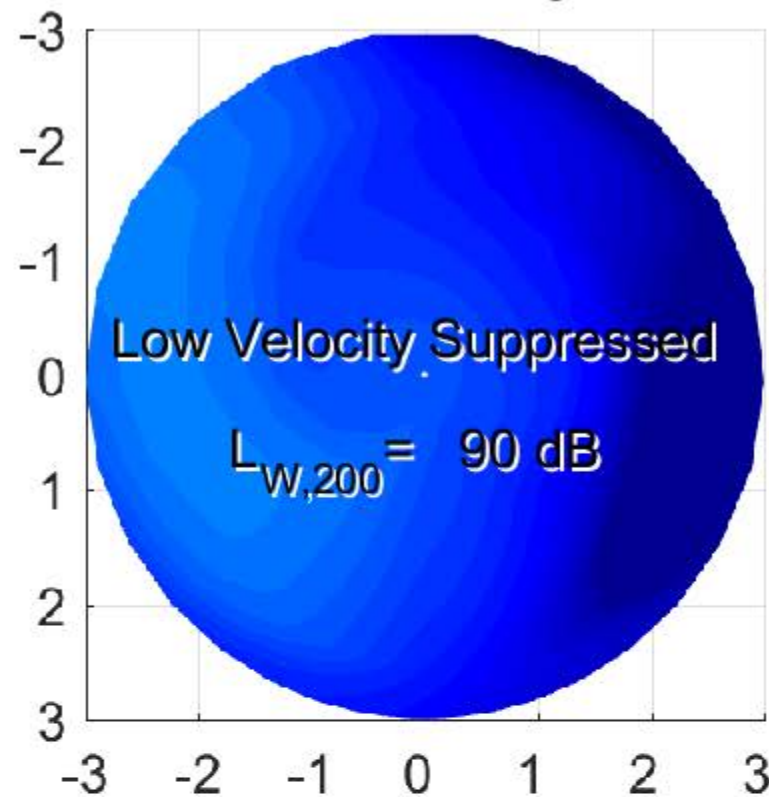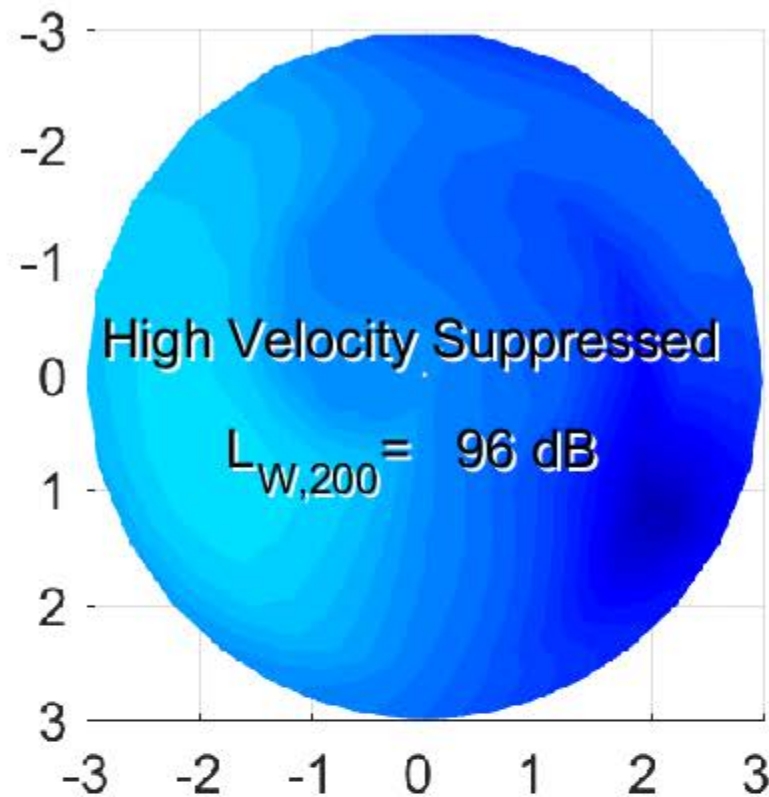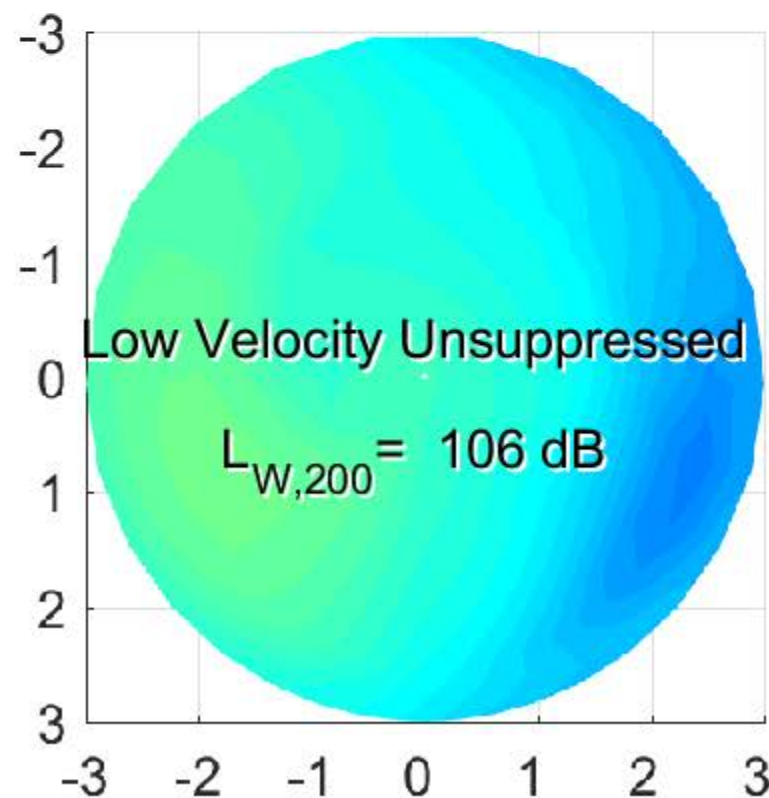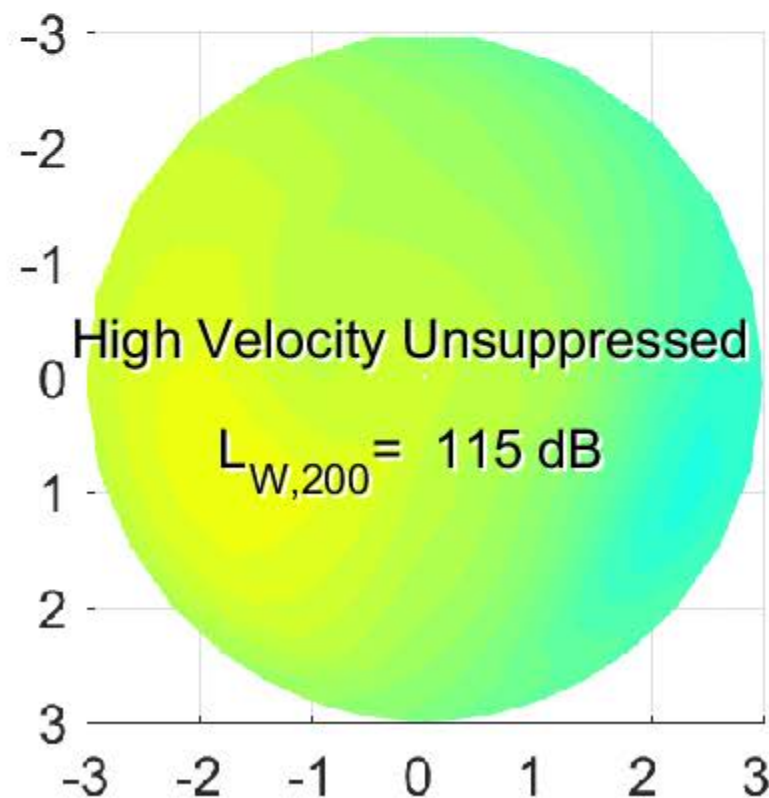

# Ruger .22 cal Pistol 250 Hz

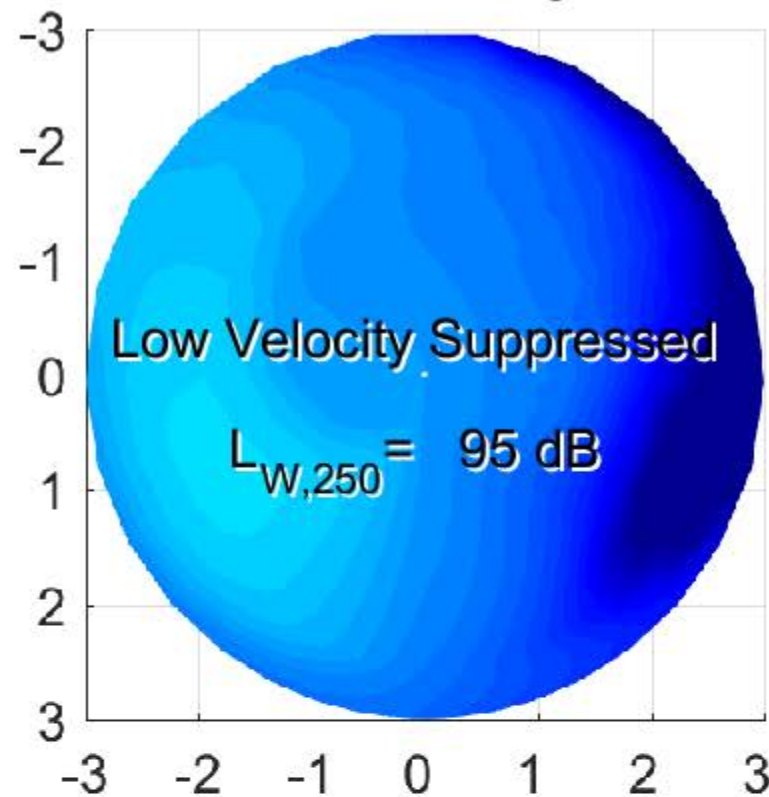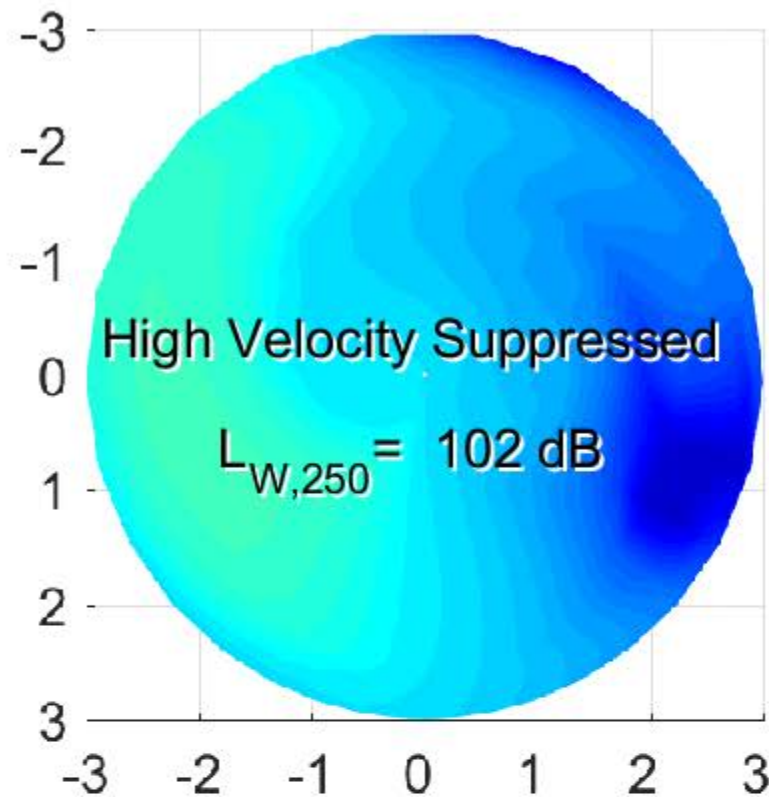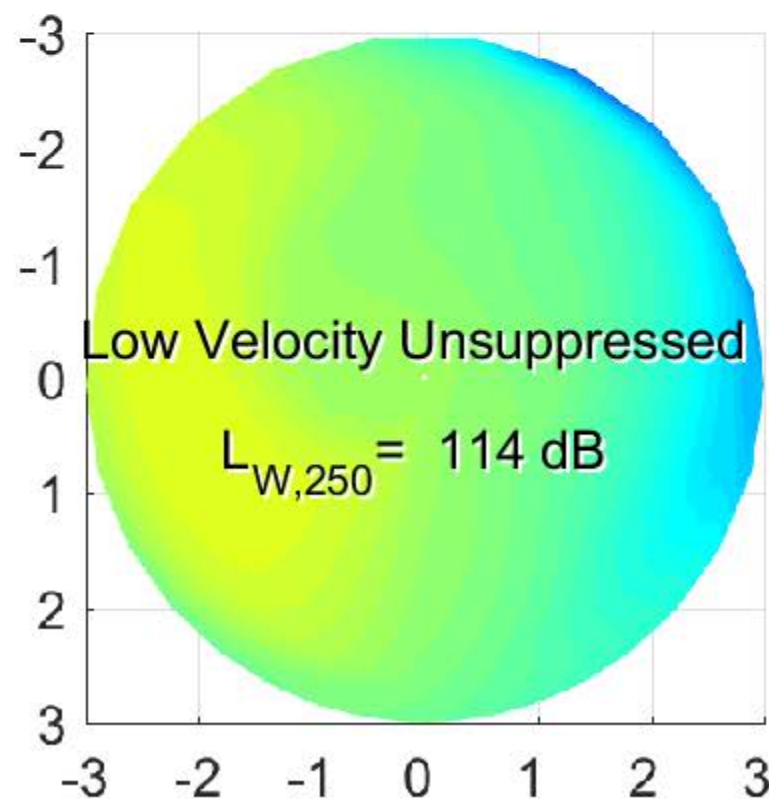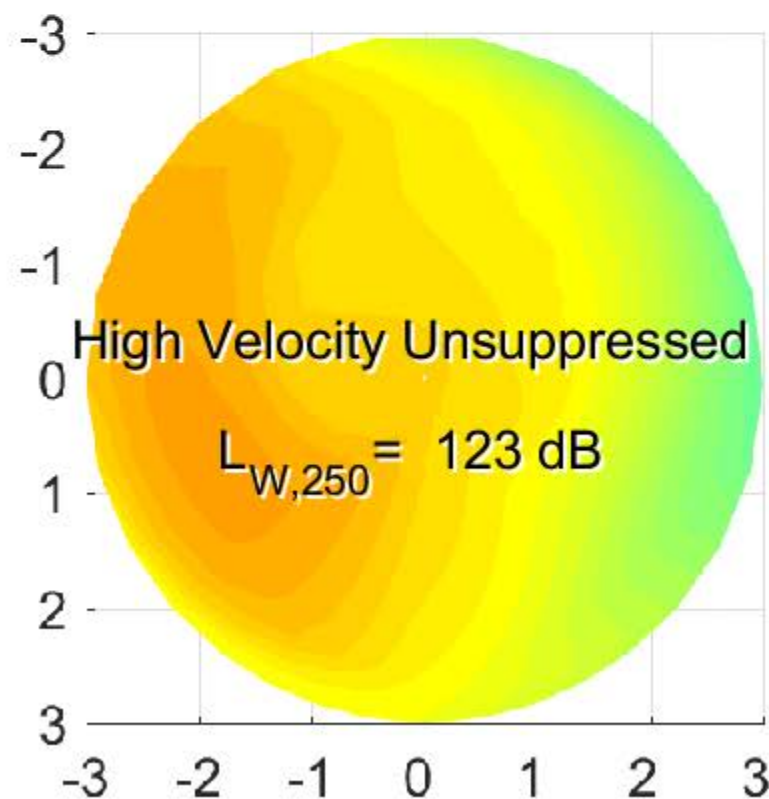

# Ruger .22 cal Pistol 315 Hz

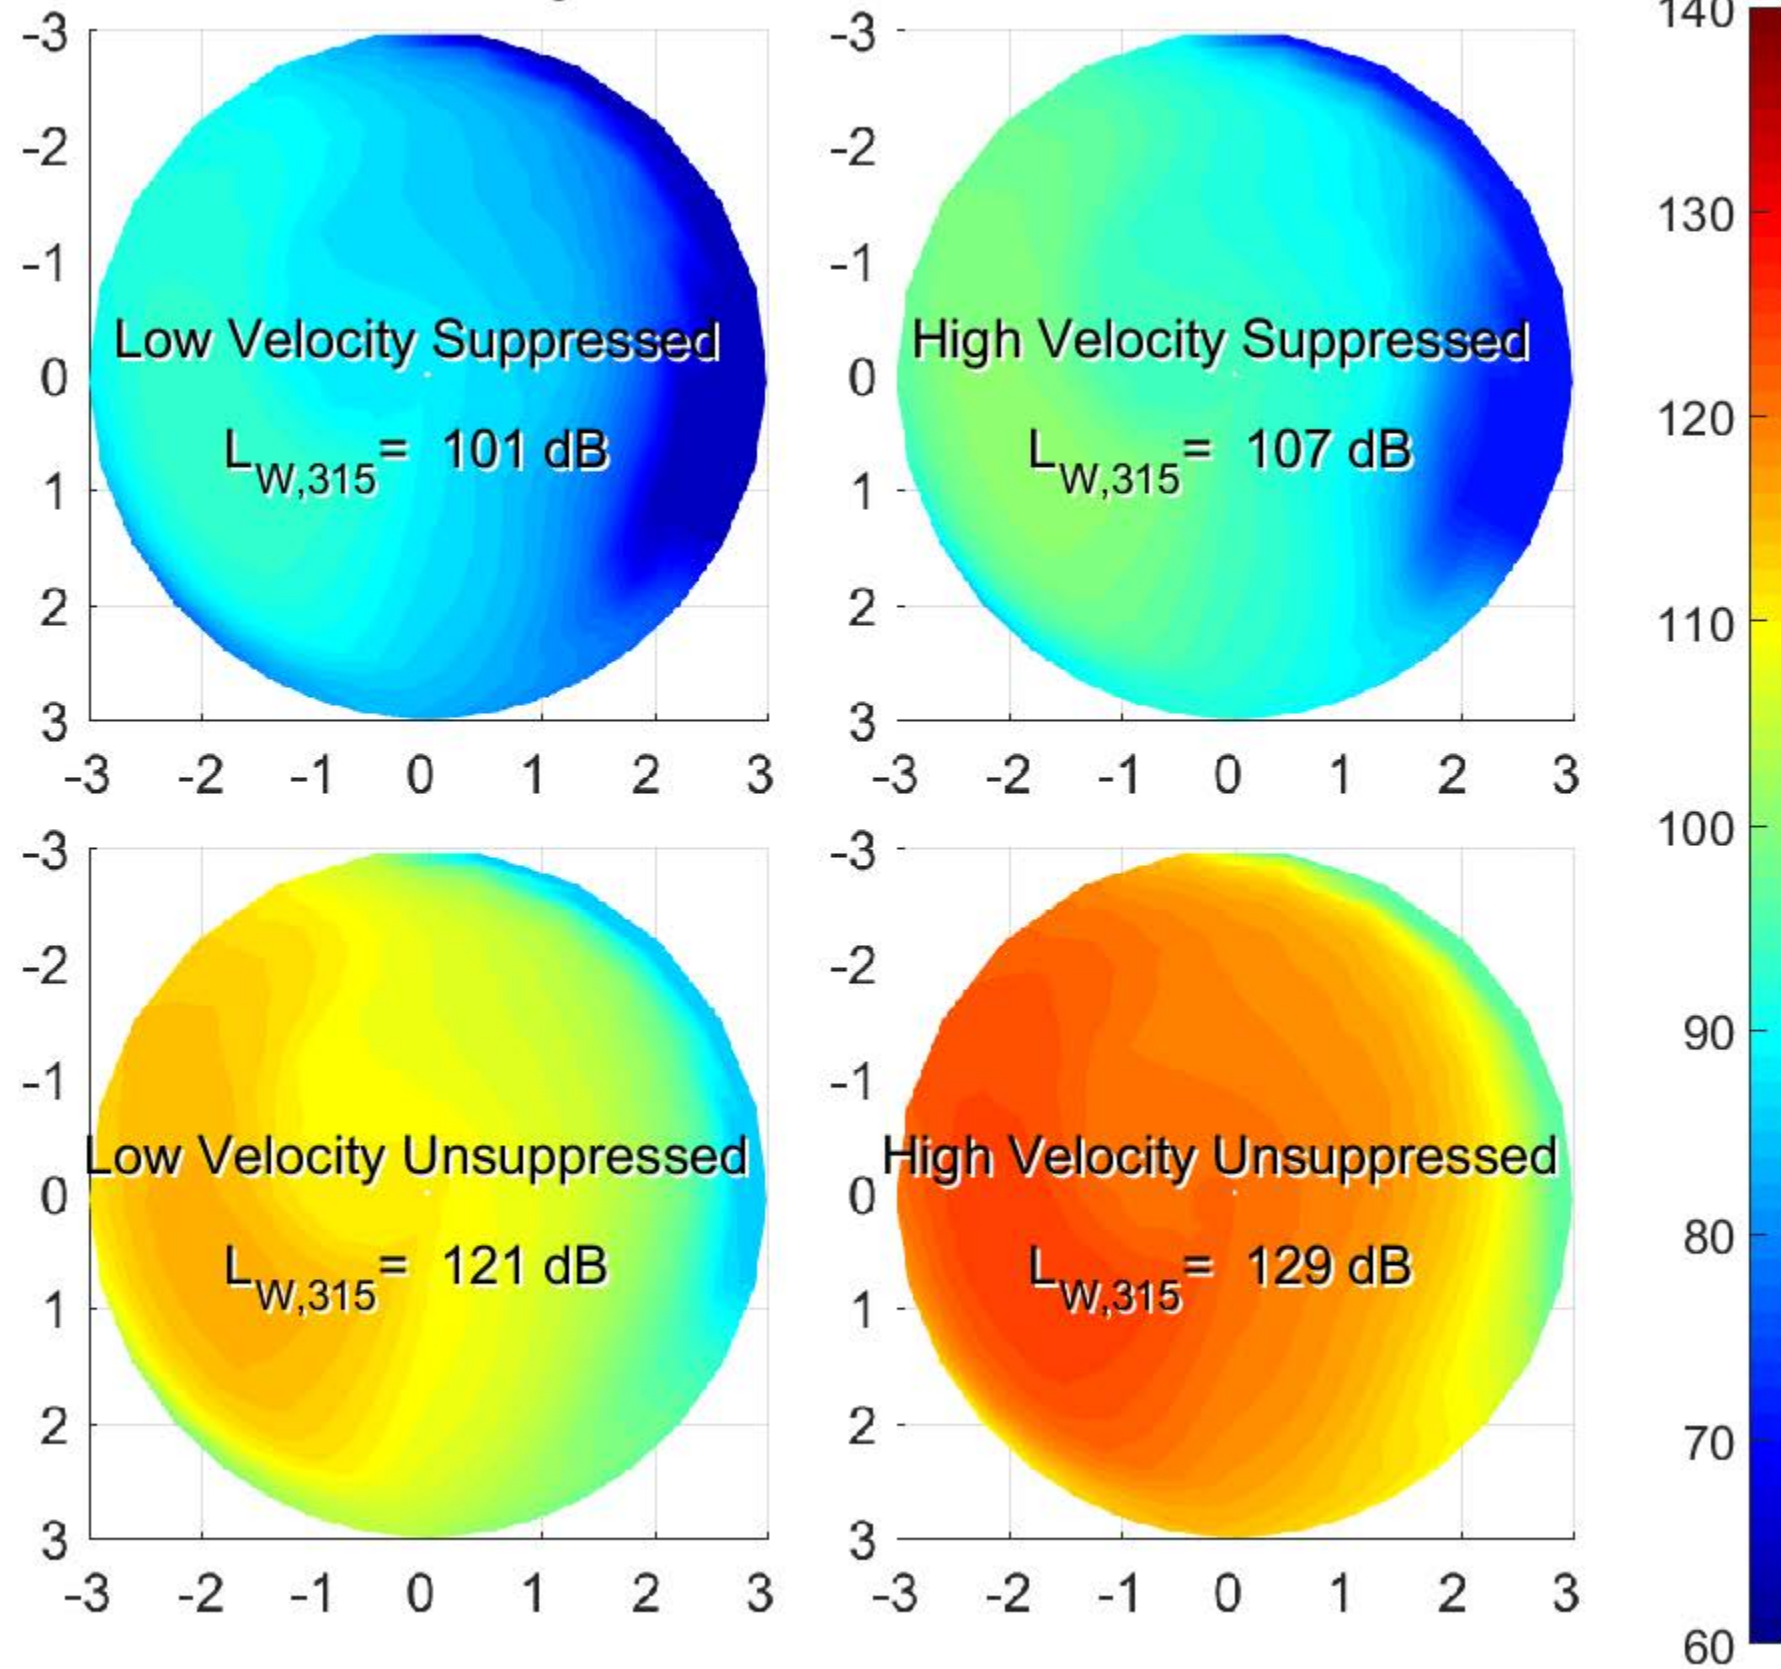

# Ruger .22 cal Pistol 400 Hz

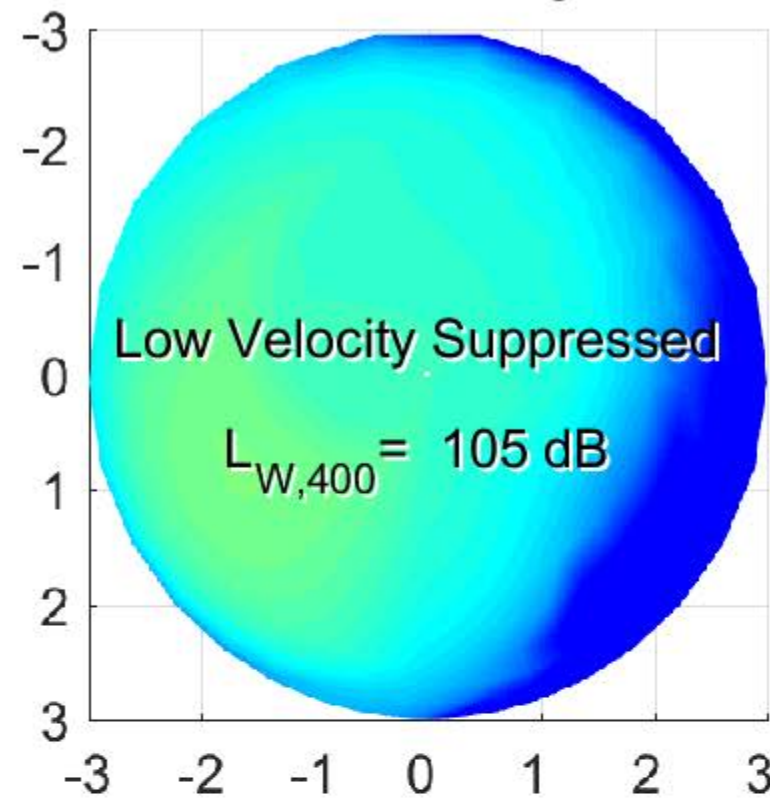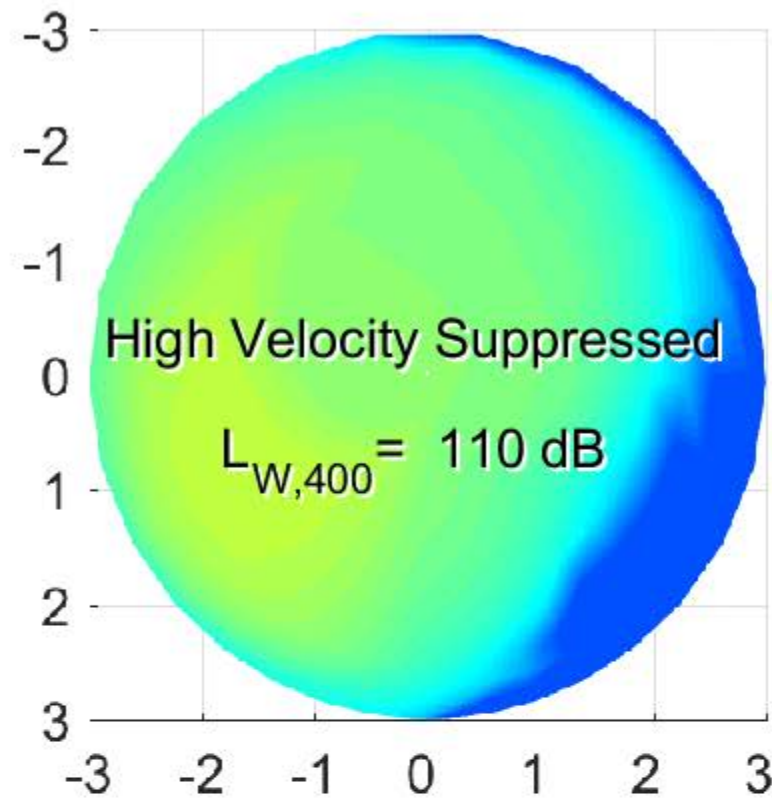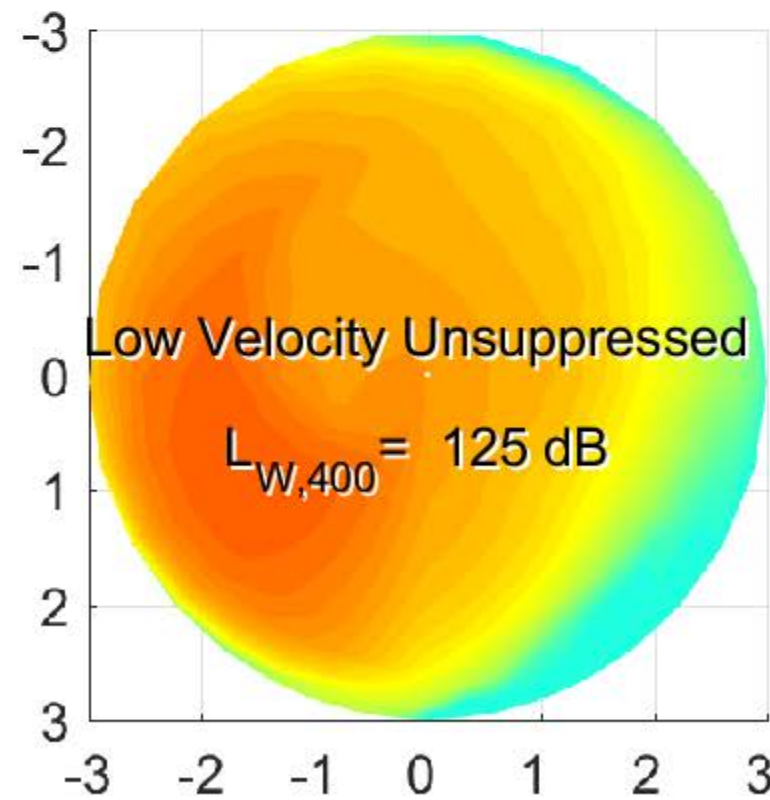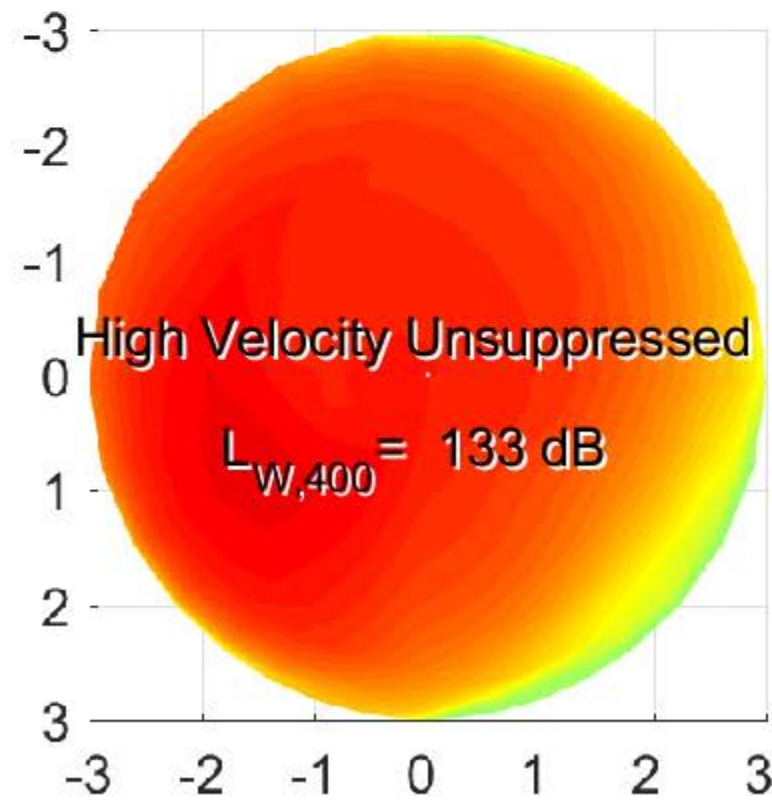

# Ruger .22 cal Pistol 500 Hz

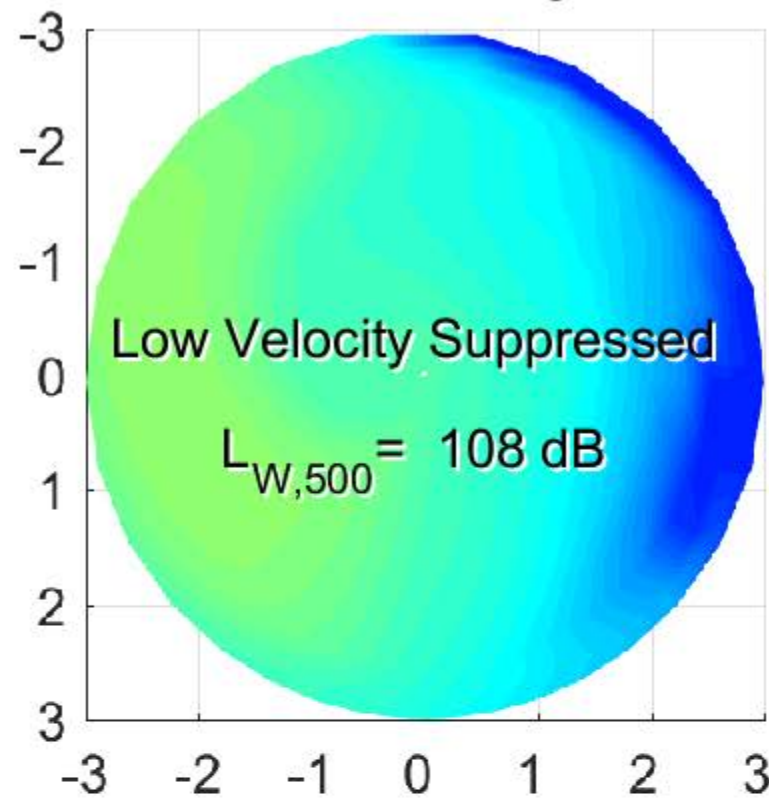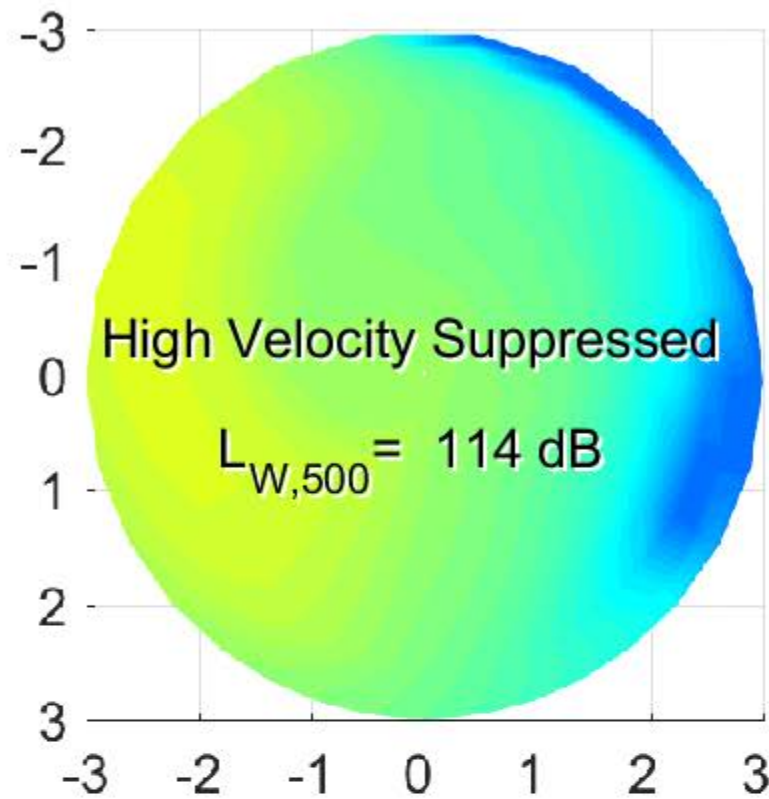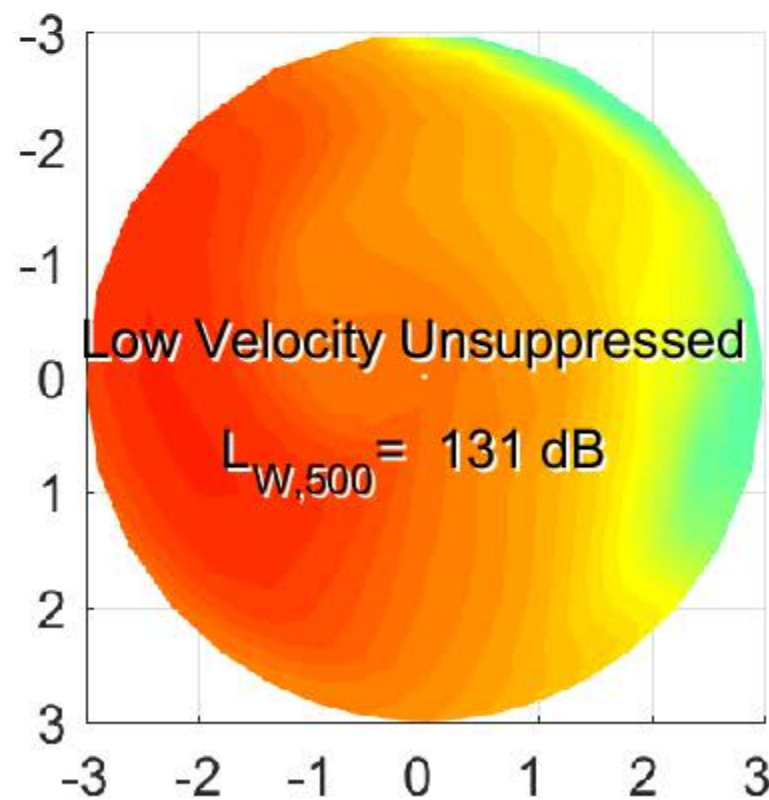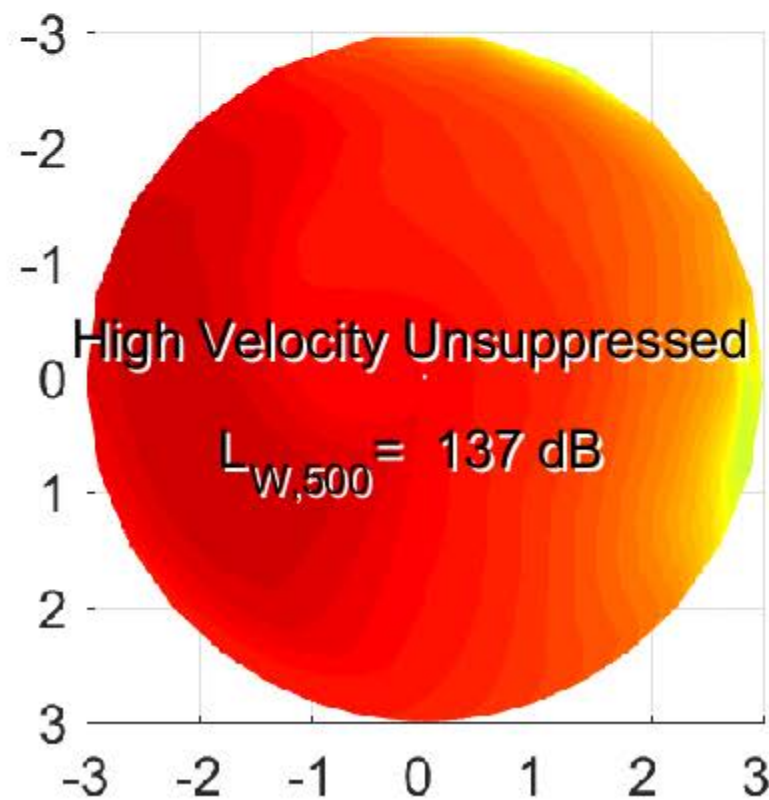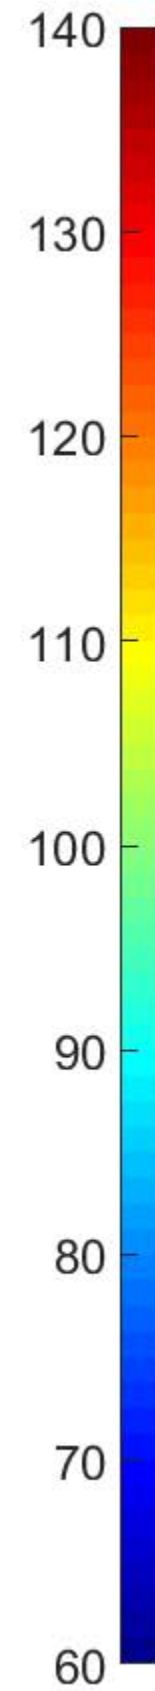

# Ruger .22 cal Pistol 630 Hz

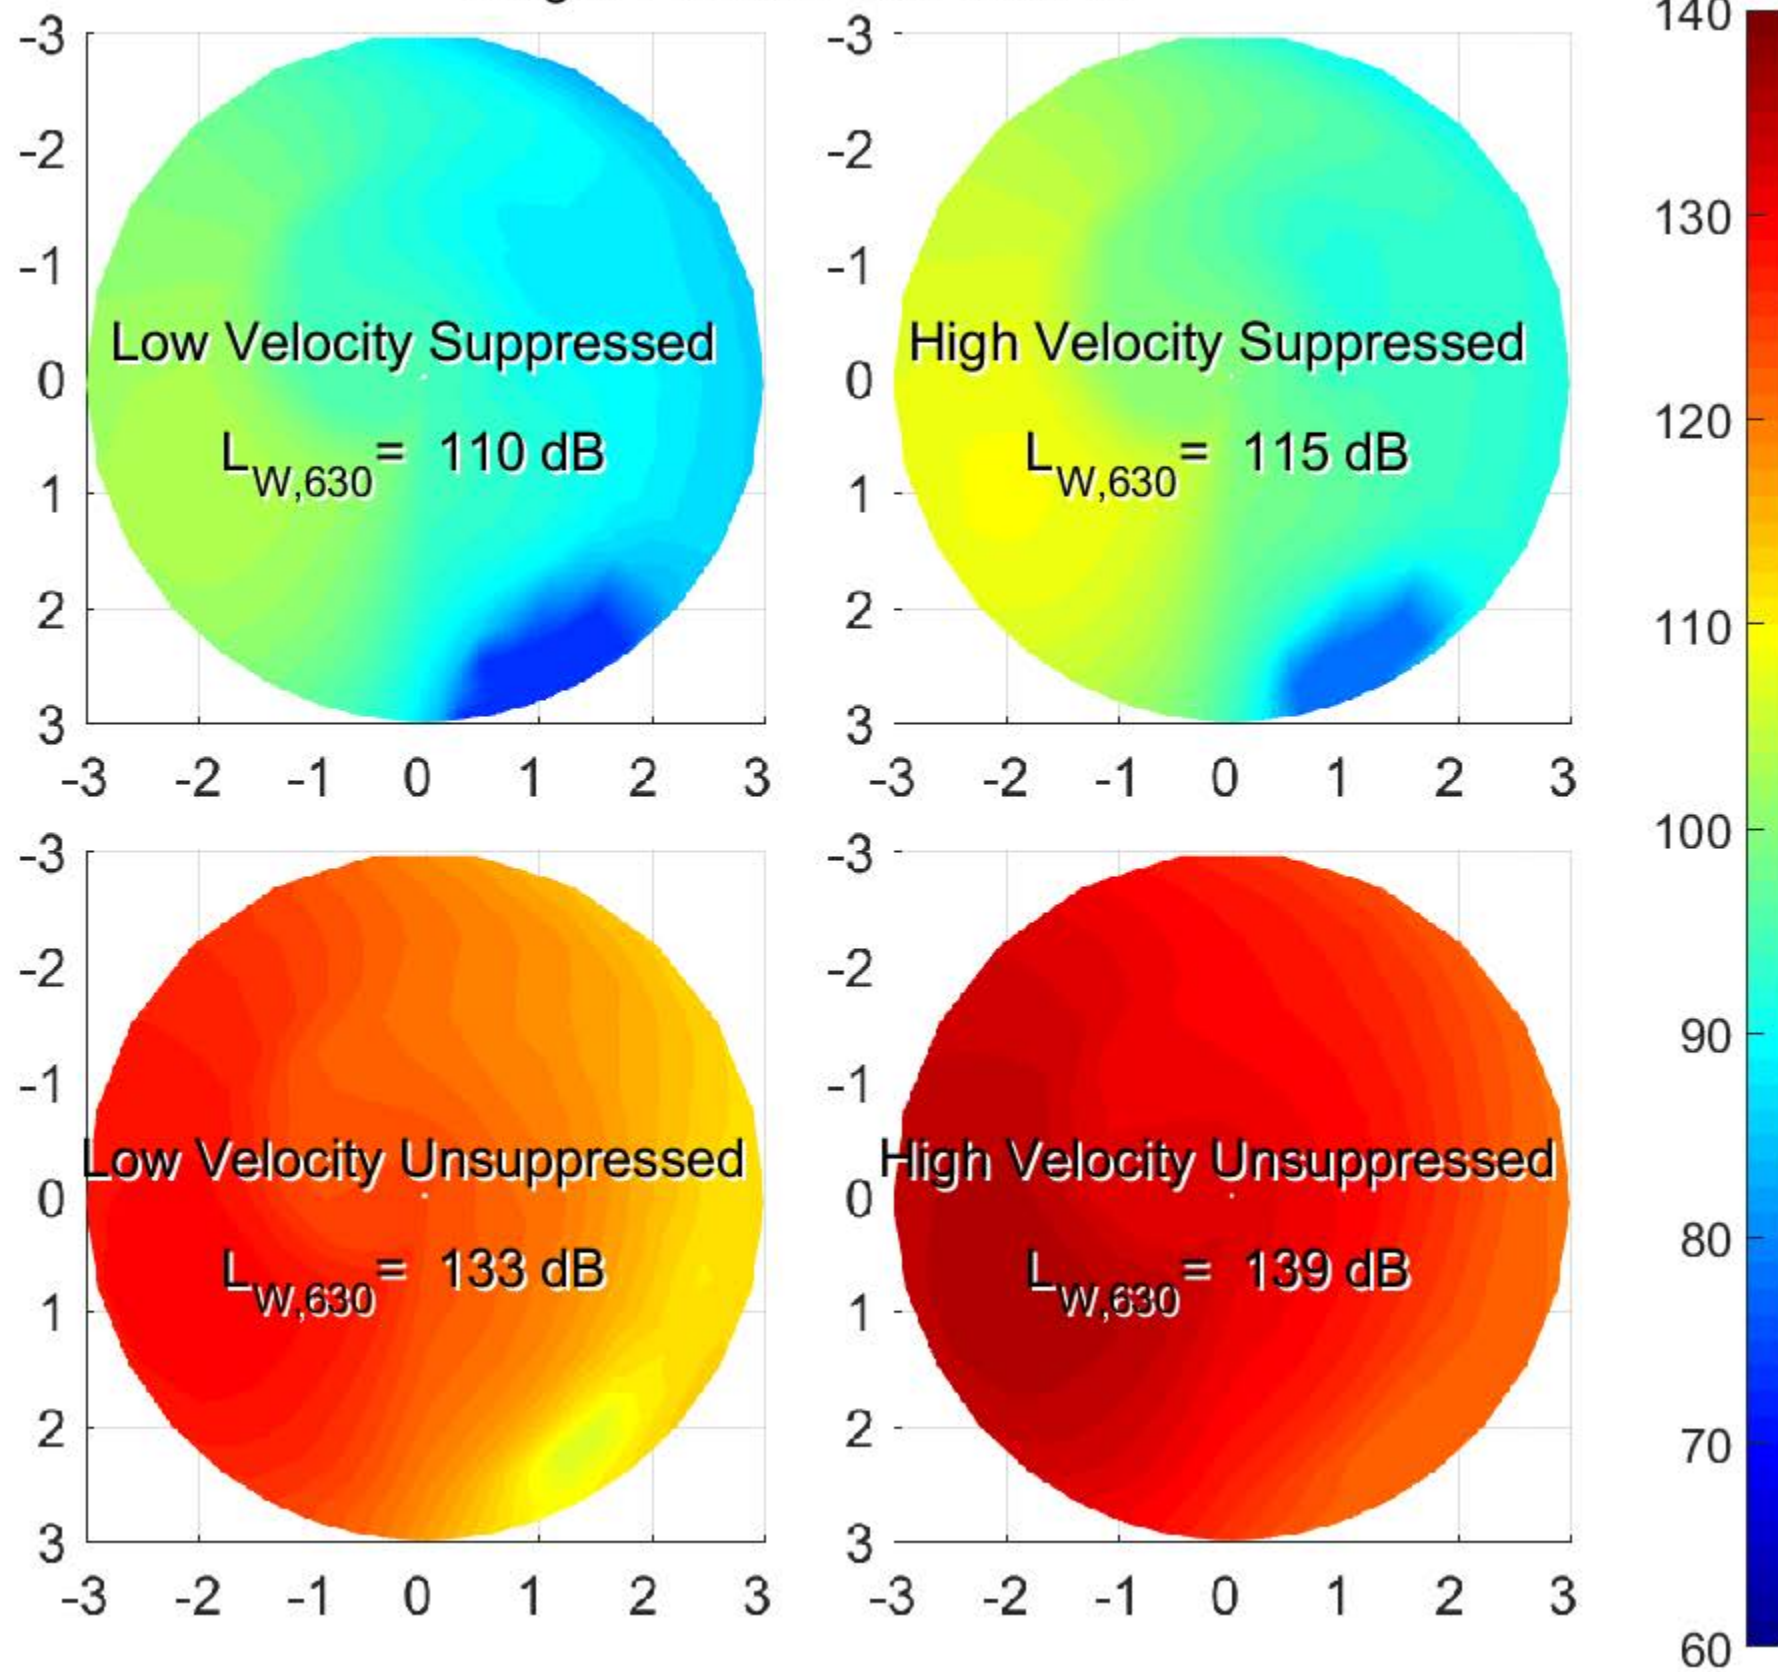

# Ruger .22 cal Pistol 800 Hz

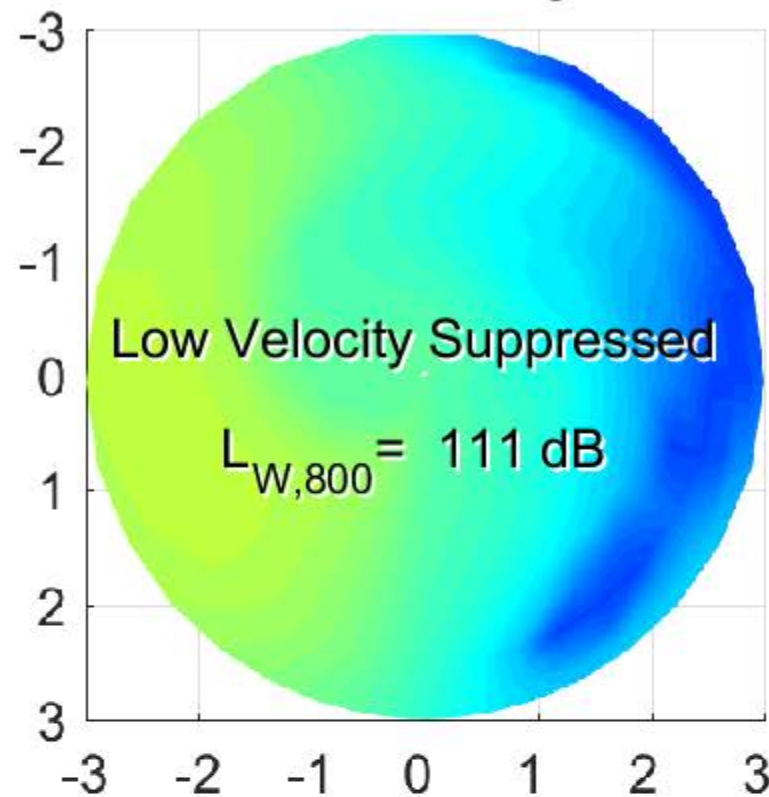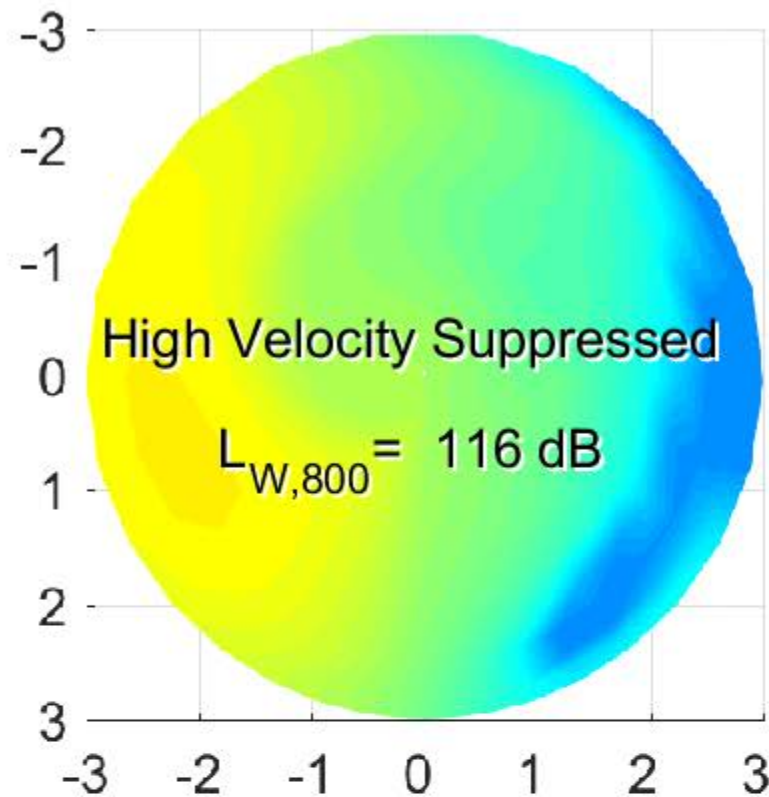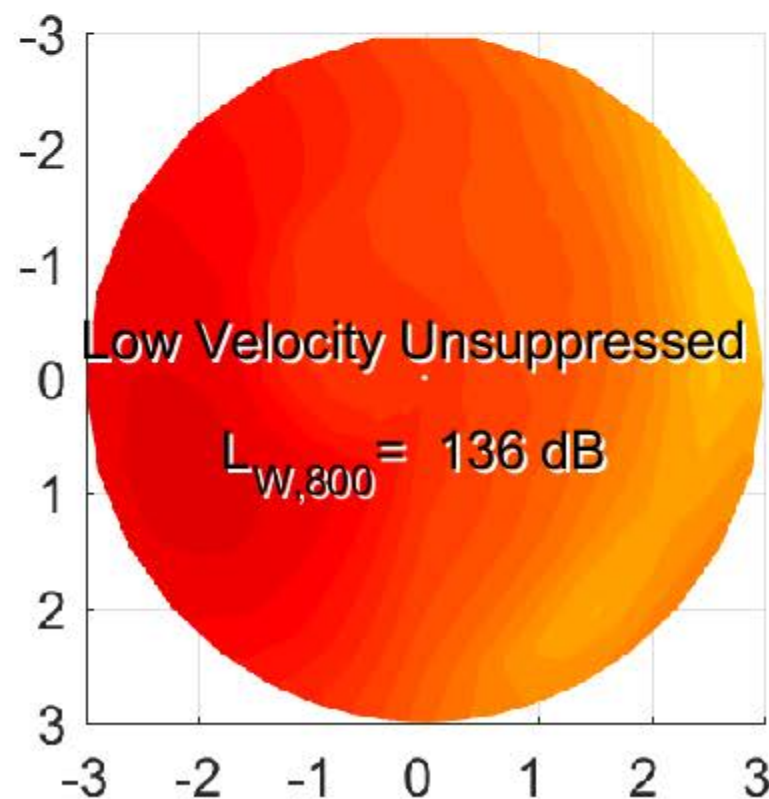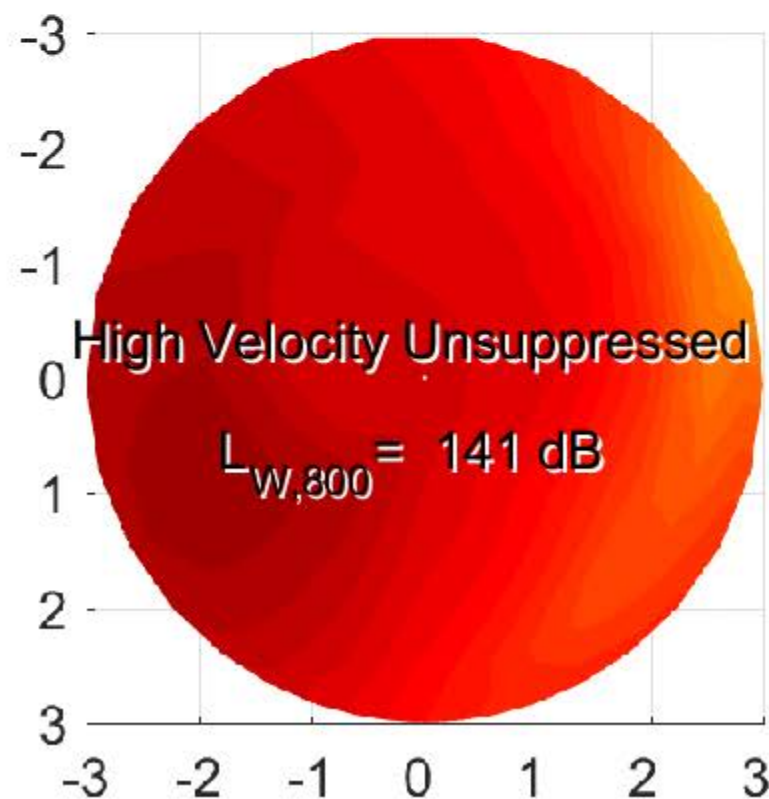

# Ruger .22 cal Pistol 1000 Hz

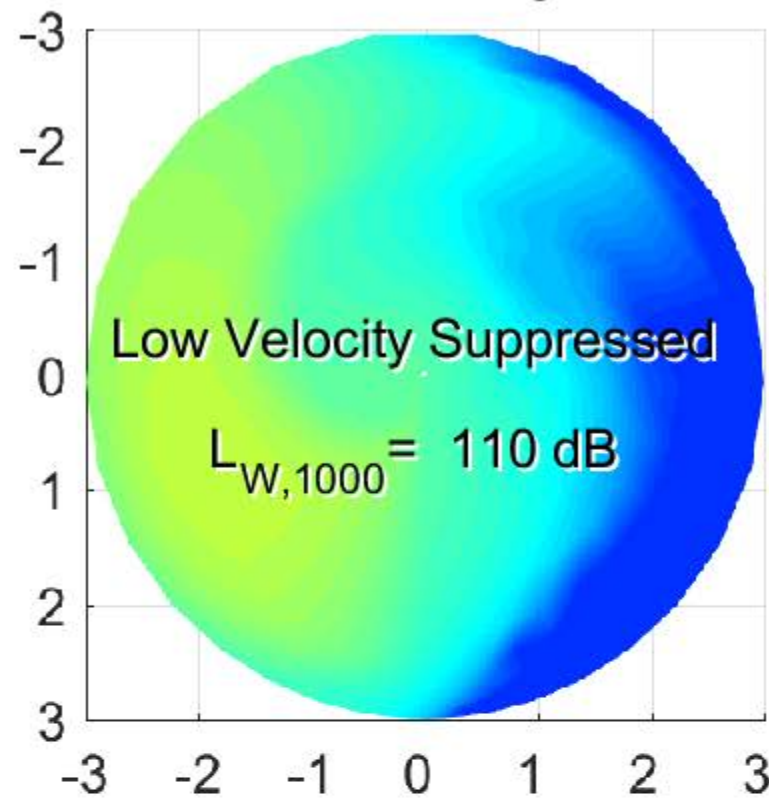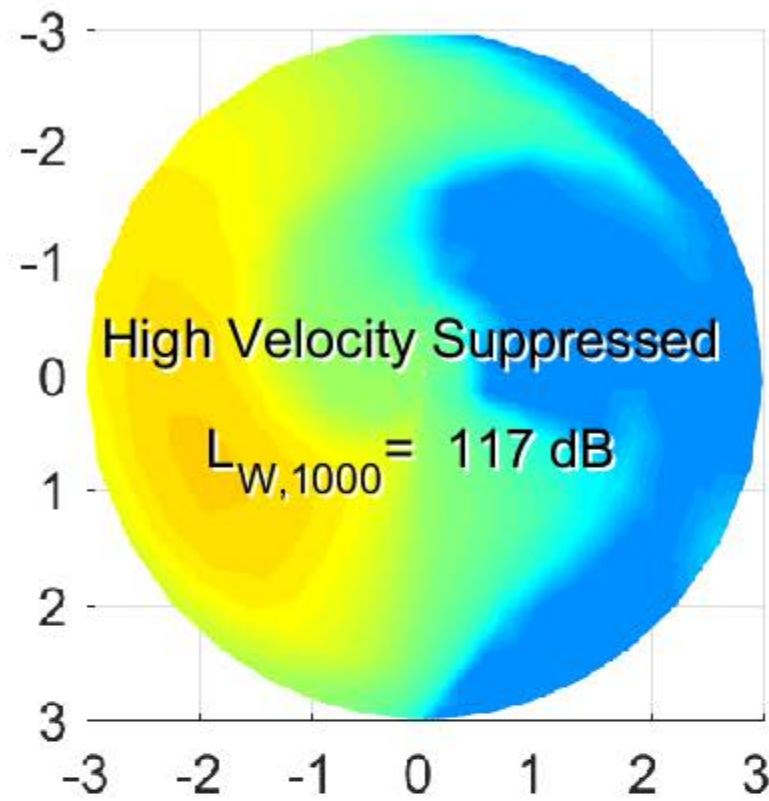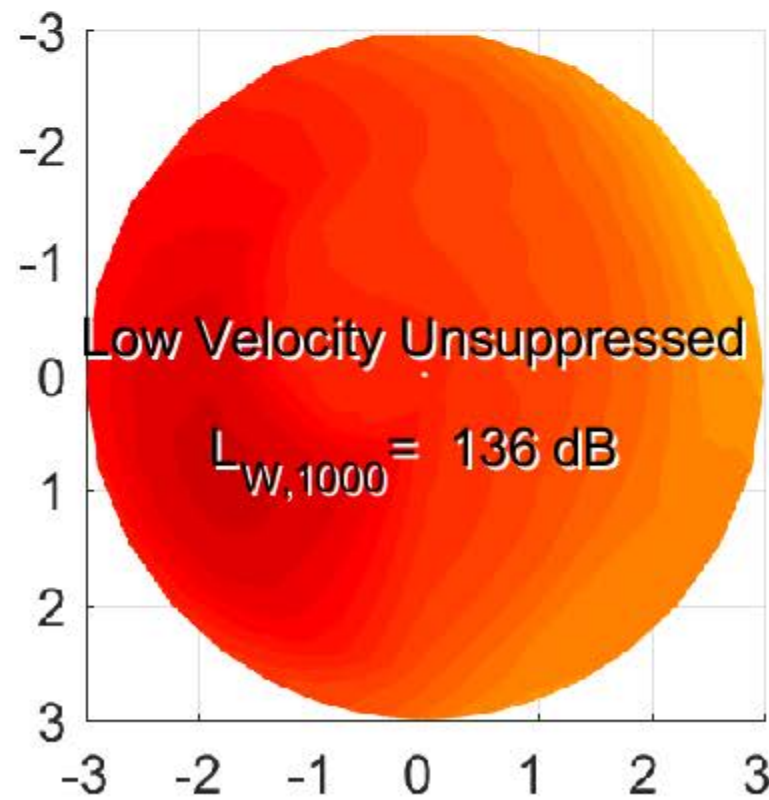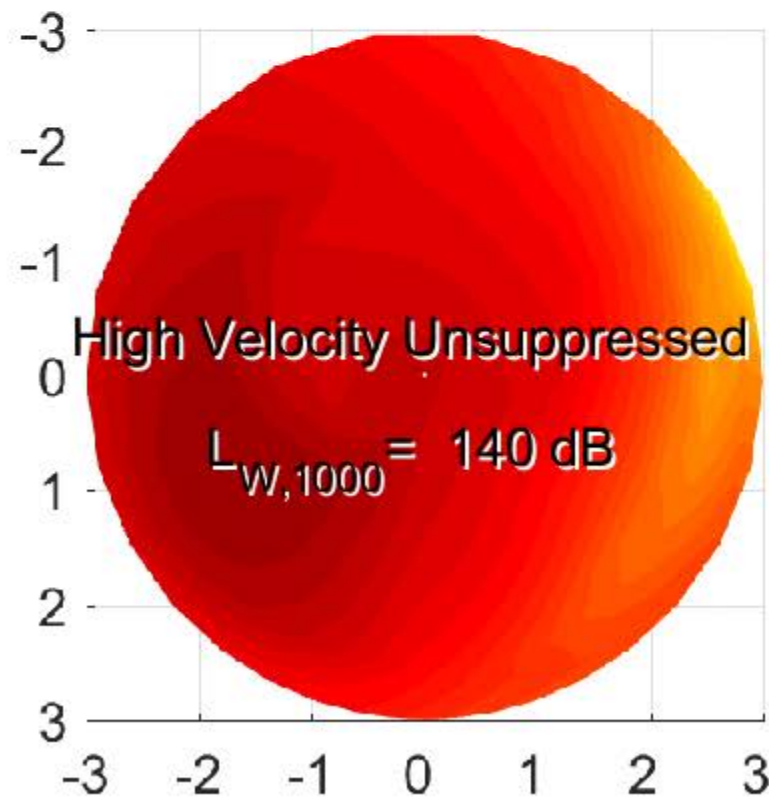

# Ruger .22 cal Pistol 1250 Hz

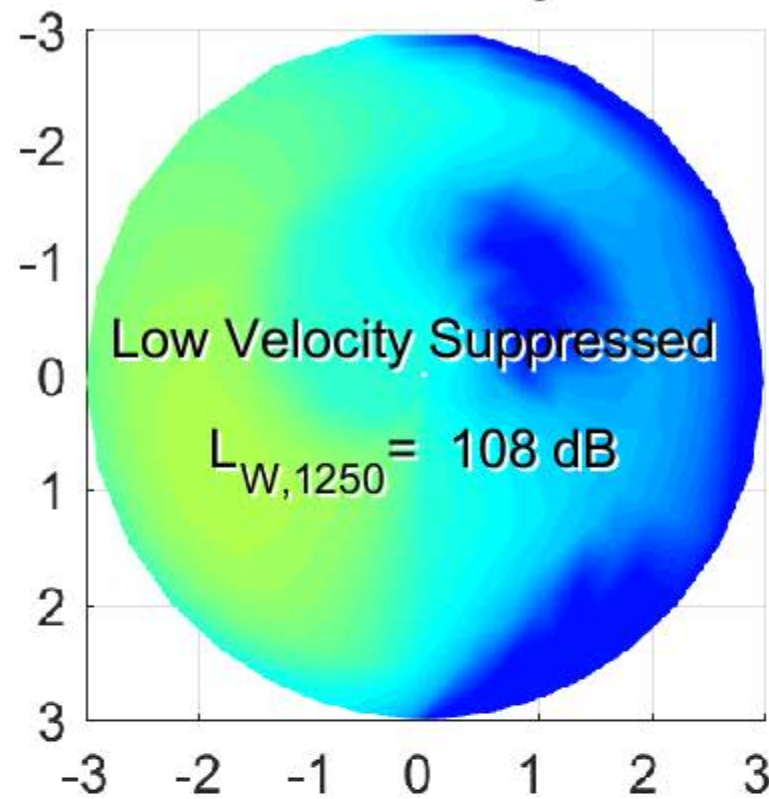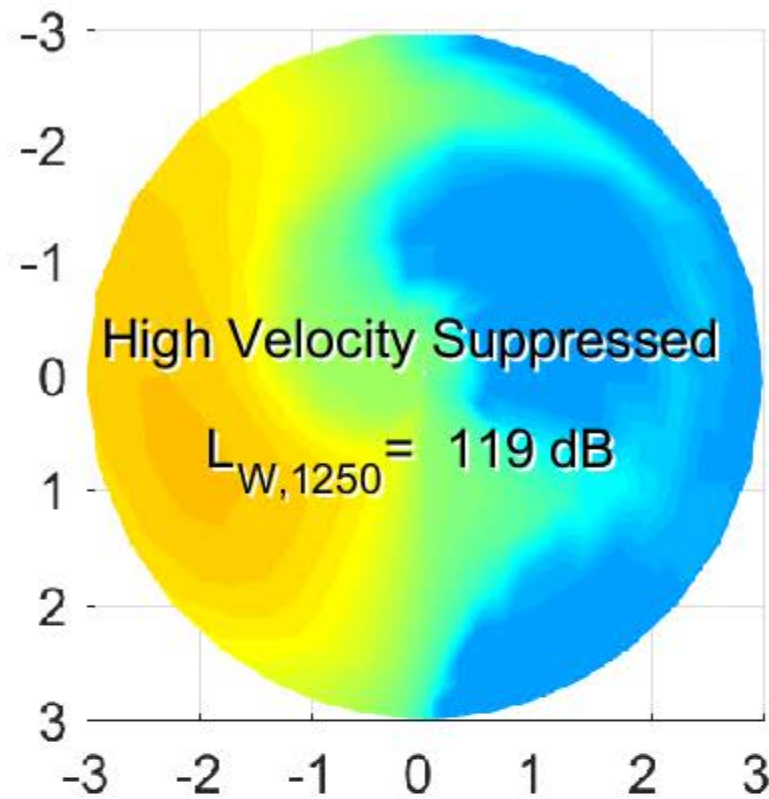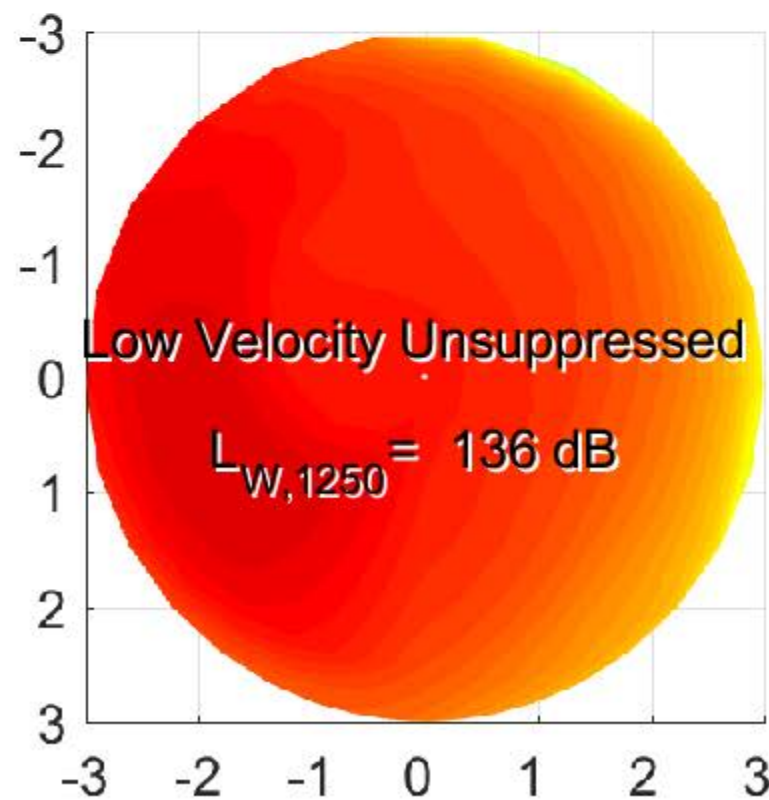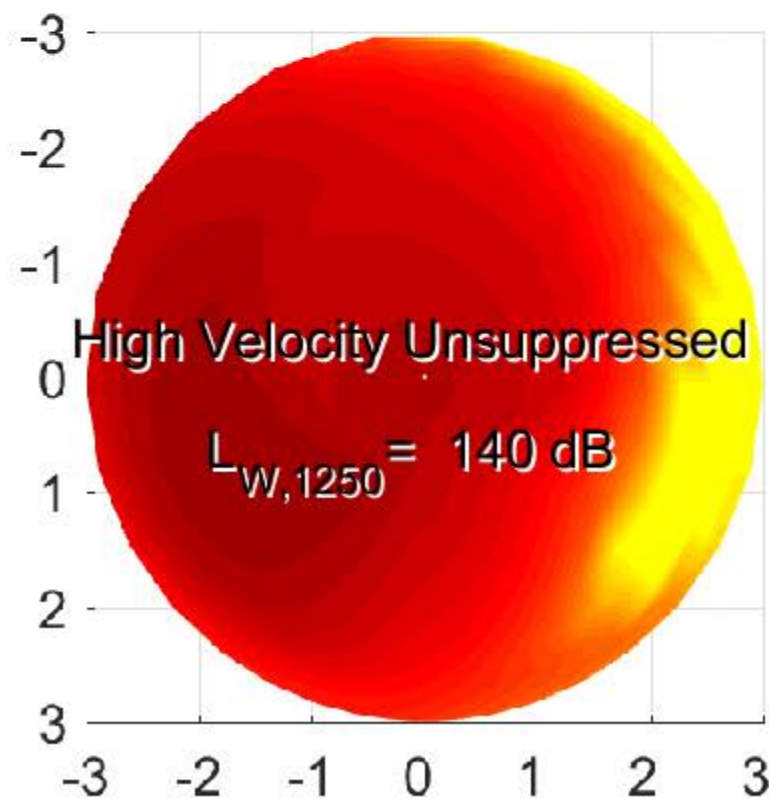

# Ruger .22 cal Pistol 1600 Hz

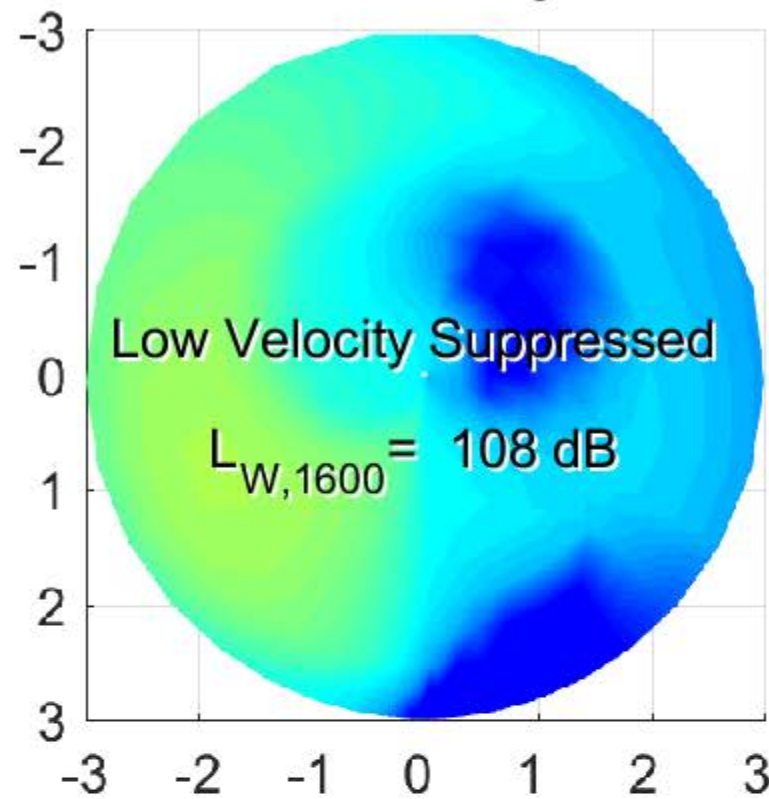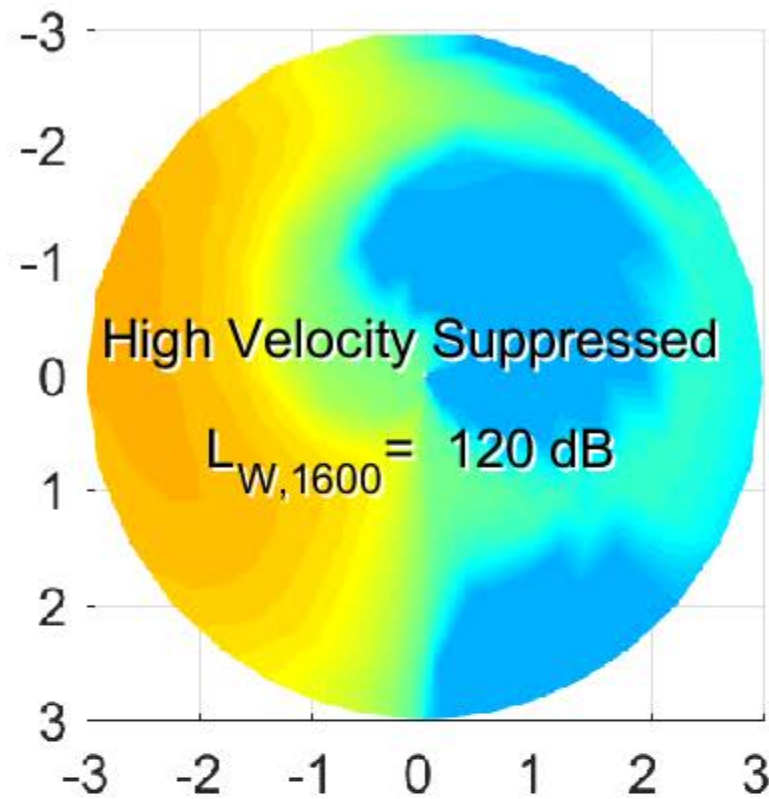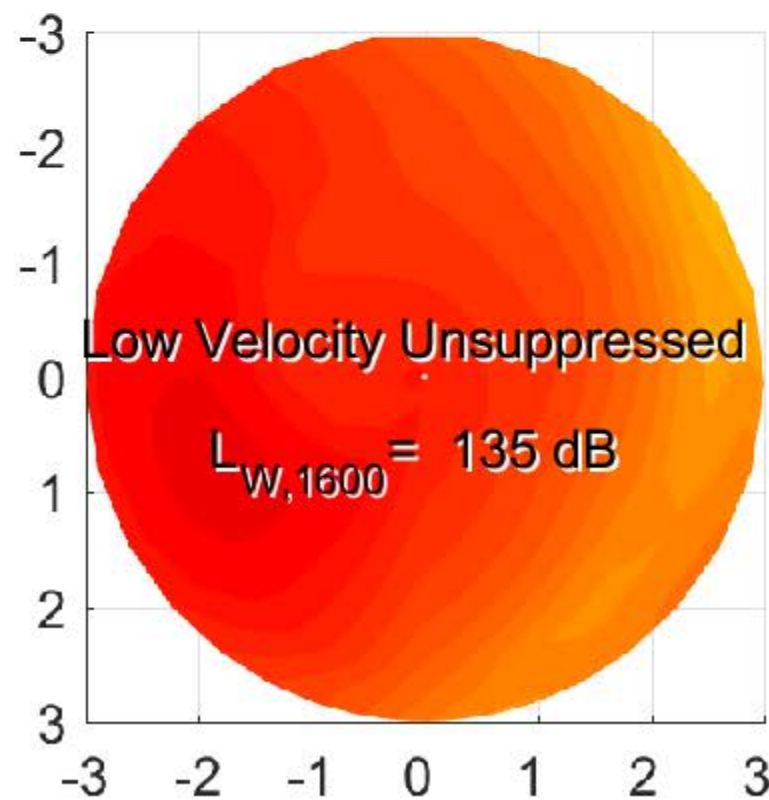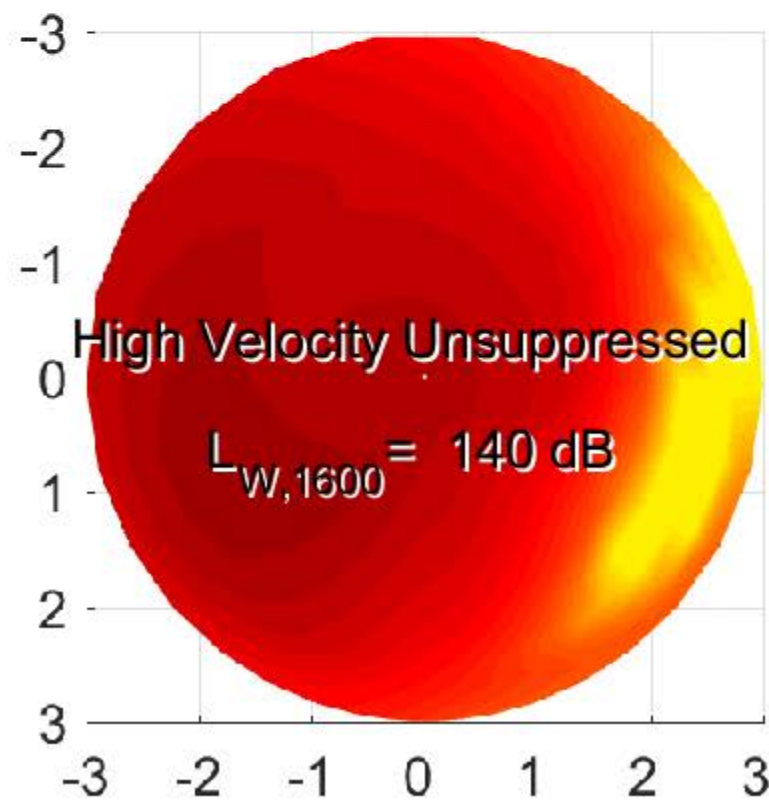

# Ruger .22 cal Pistol 2000 Hz

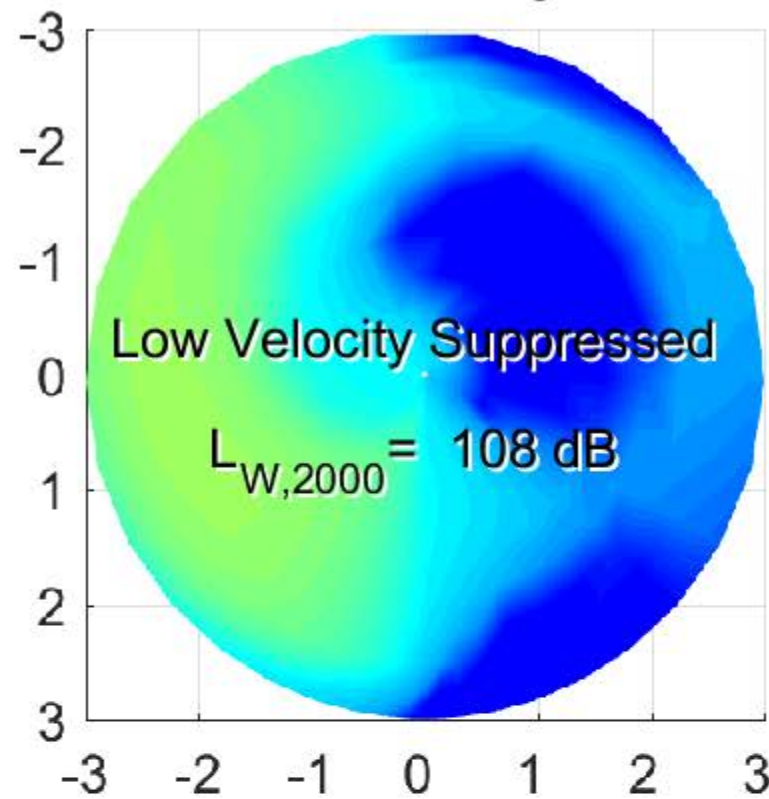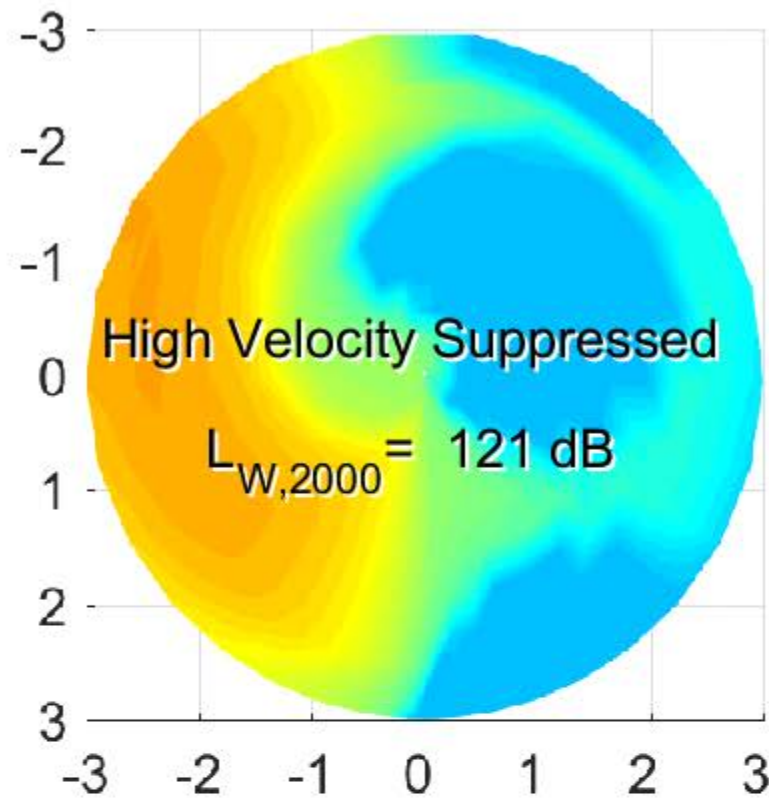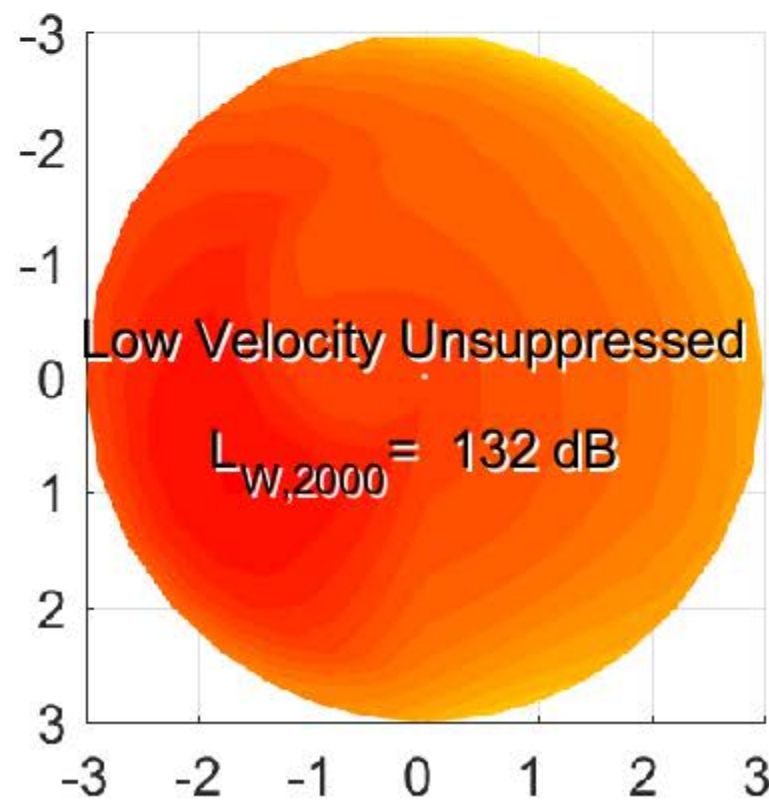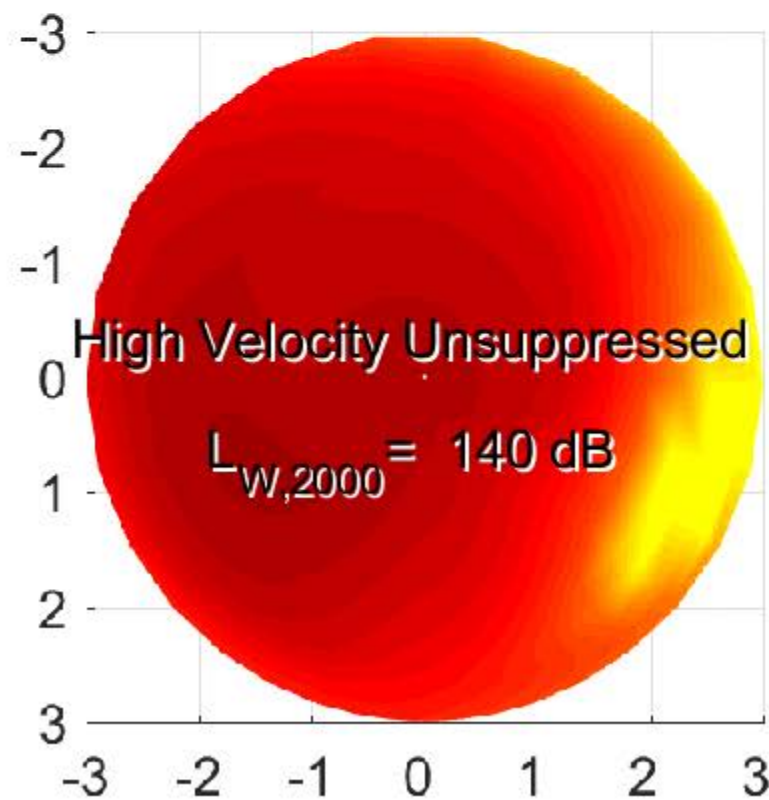

# Ruger .22 cal Pistol 2500 Hz

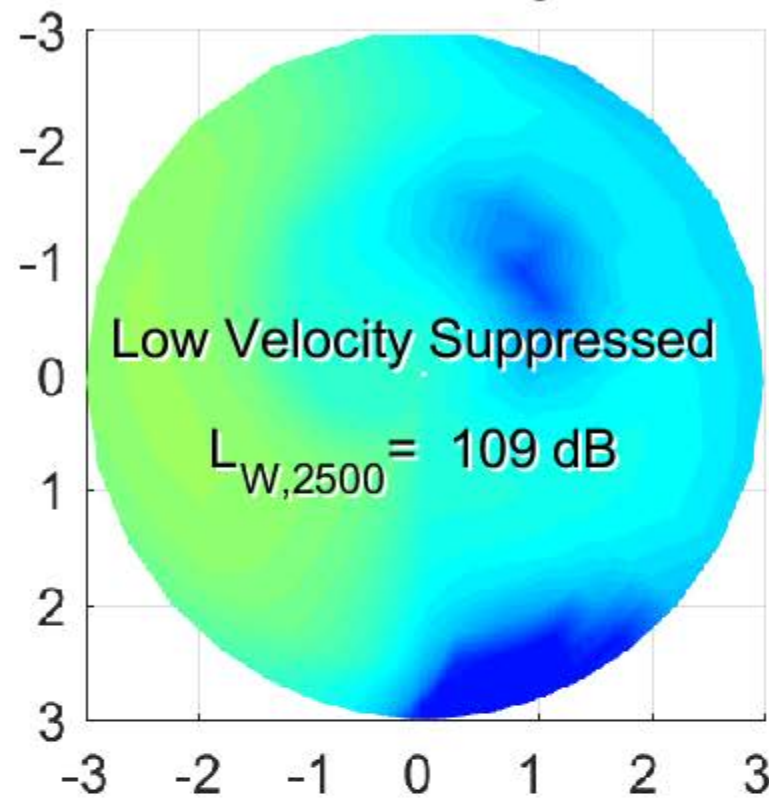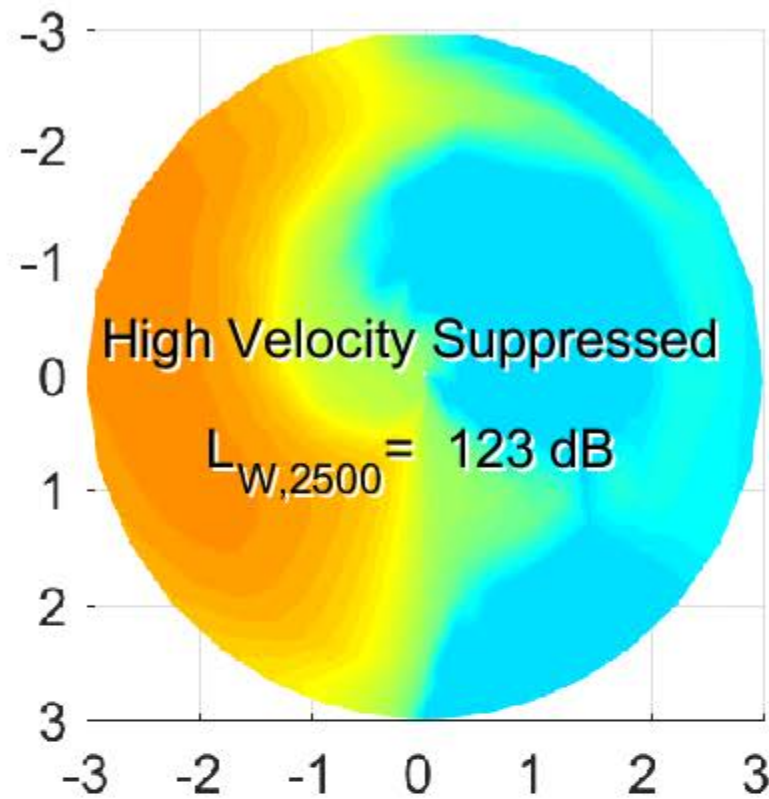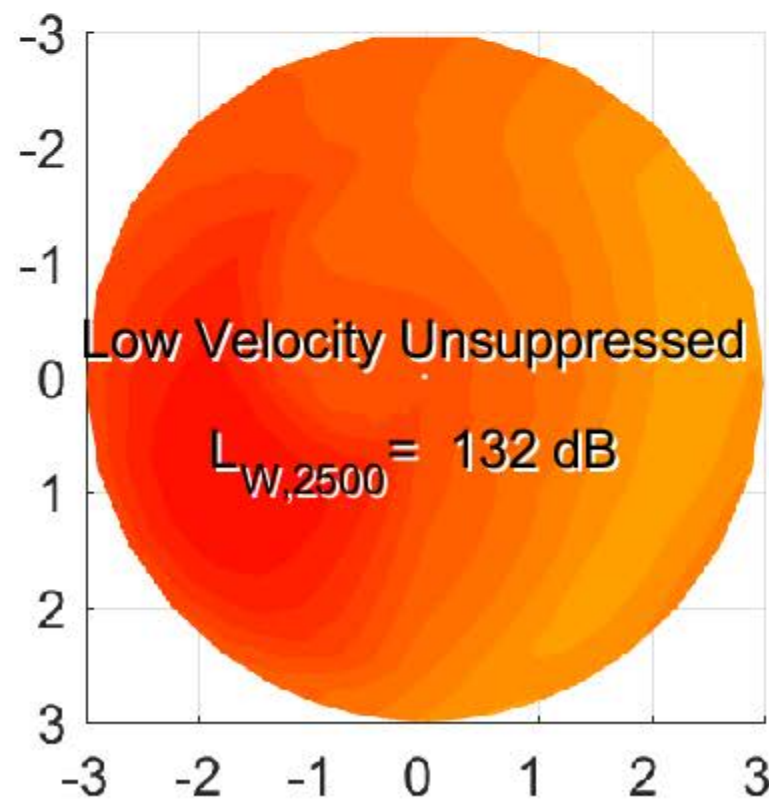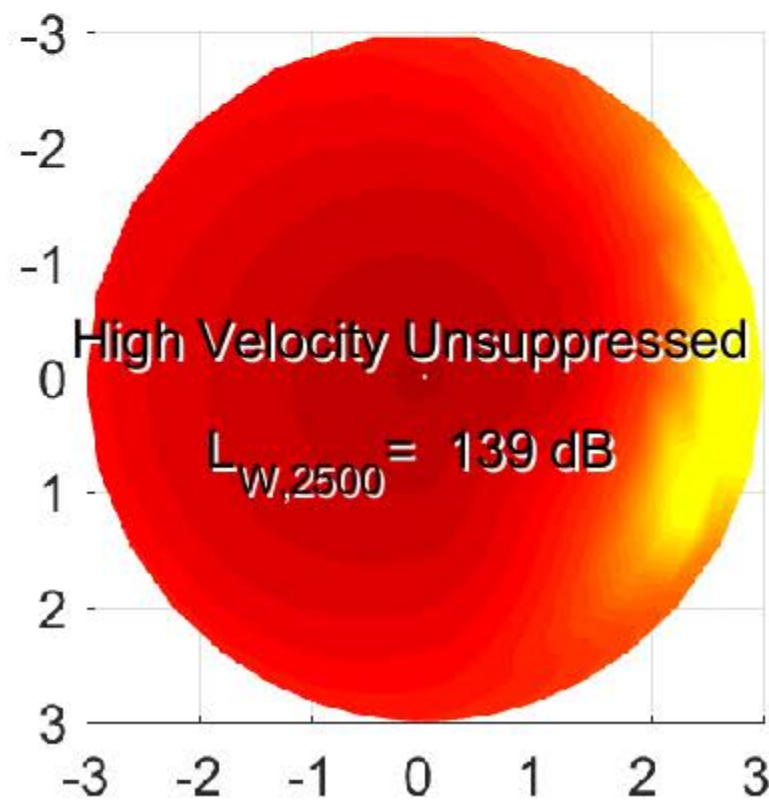

# Ruger .22 cal Pistol 3150 Hz

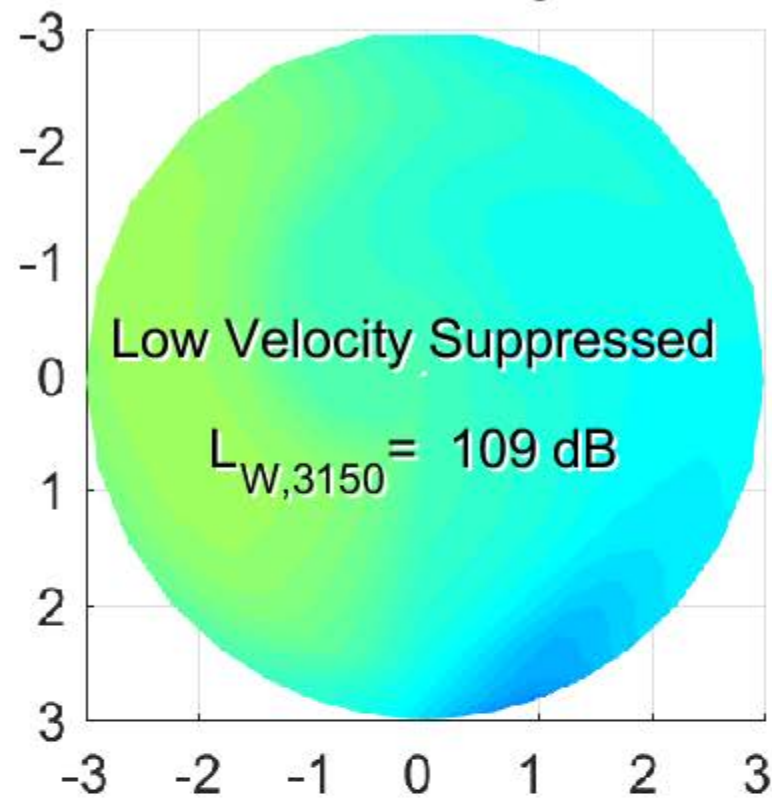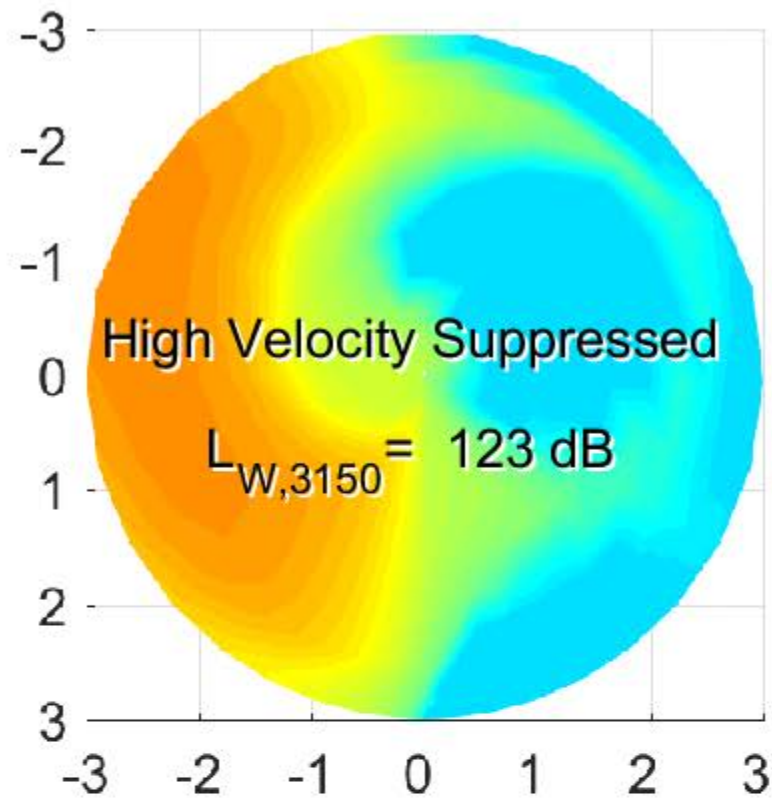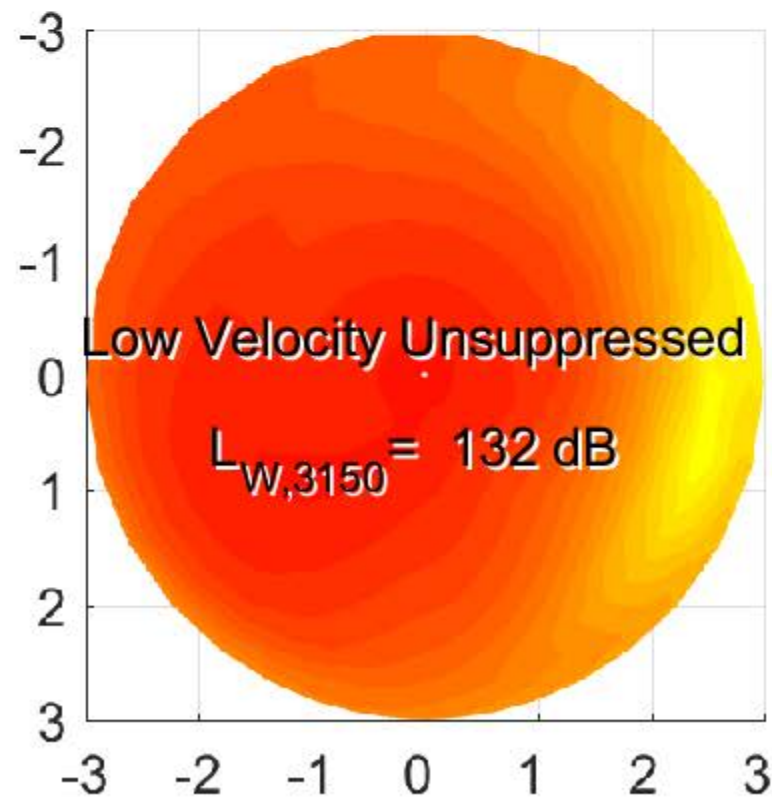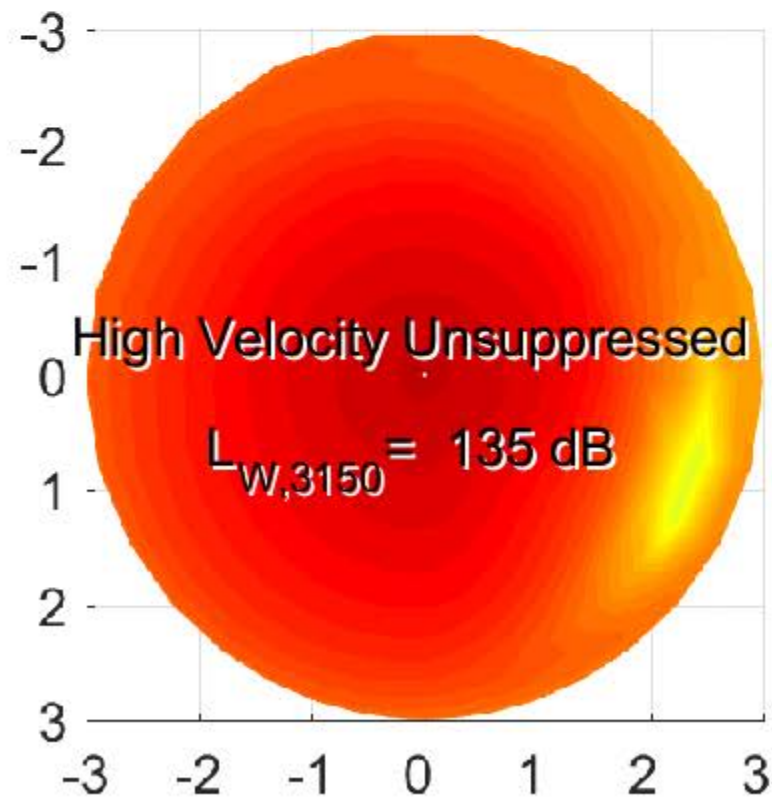

# Ruger .22 cal Pistol 4000 Hz

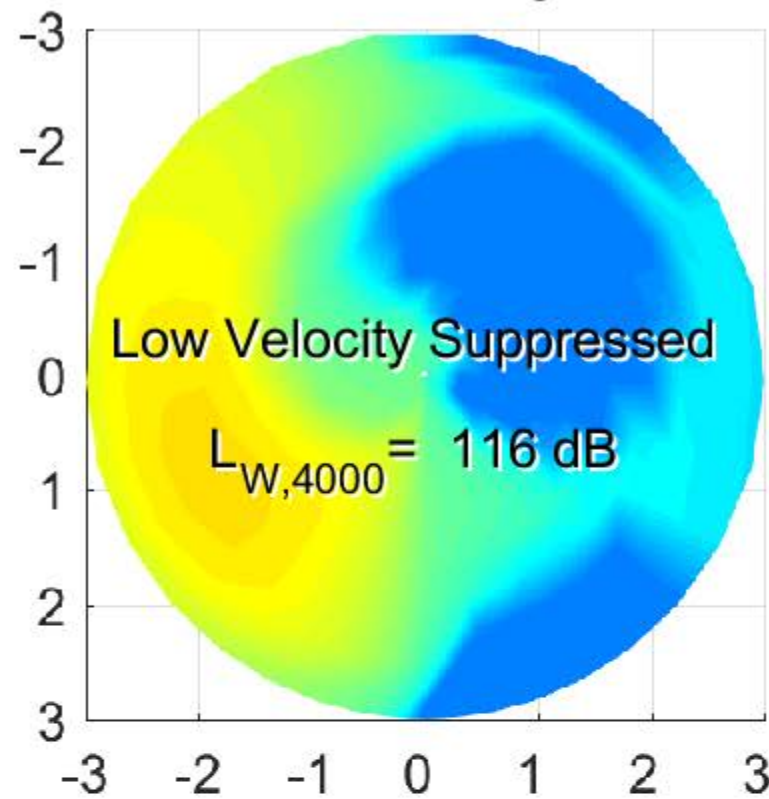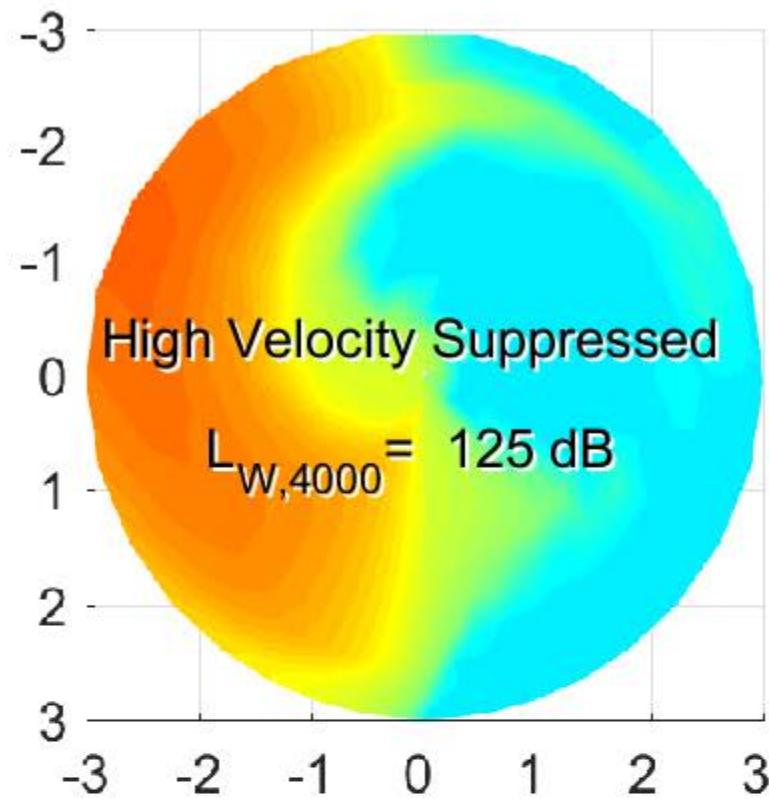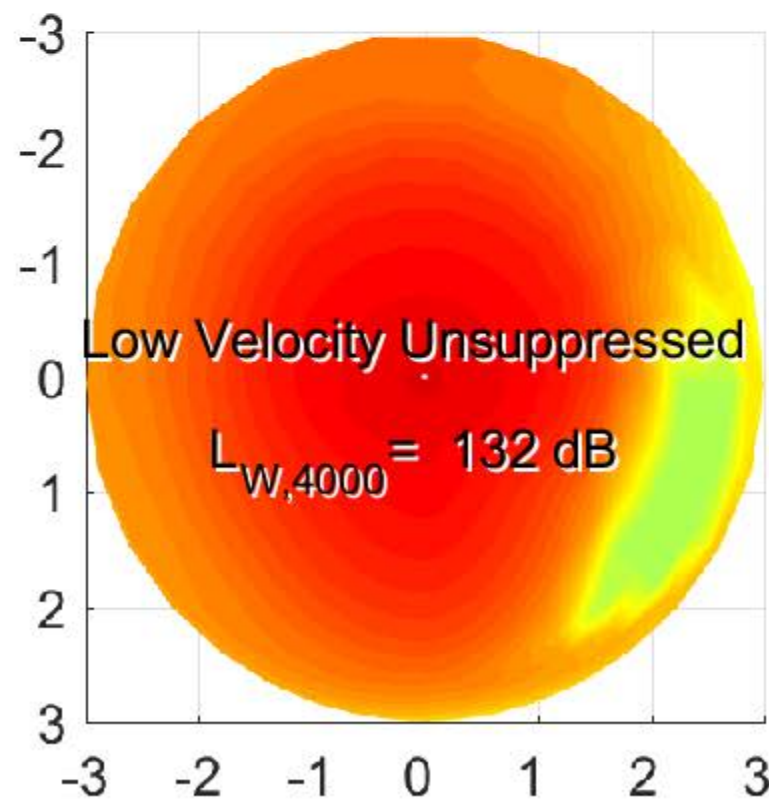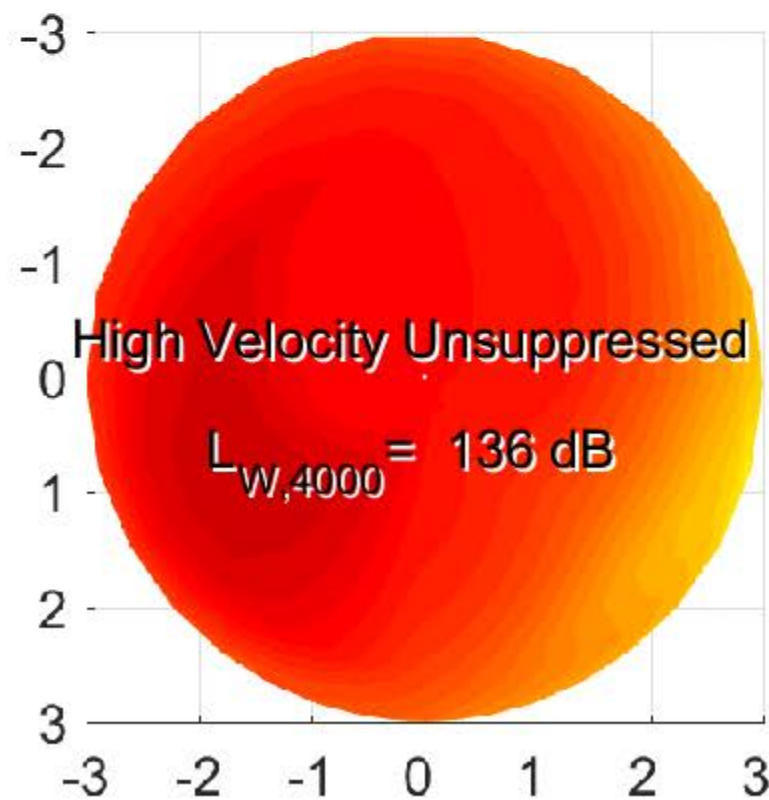

# Ruger .22 cal Pistol 5000 Hz

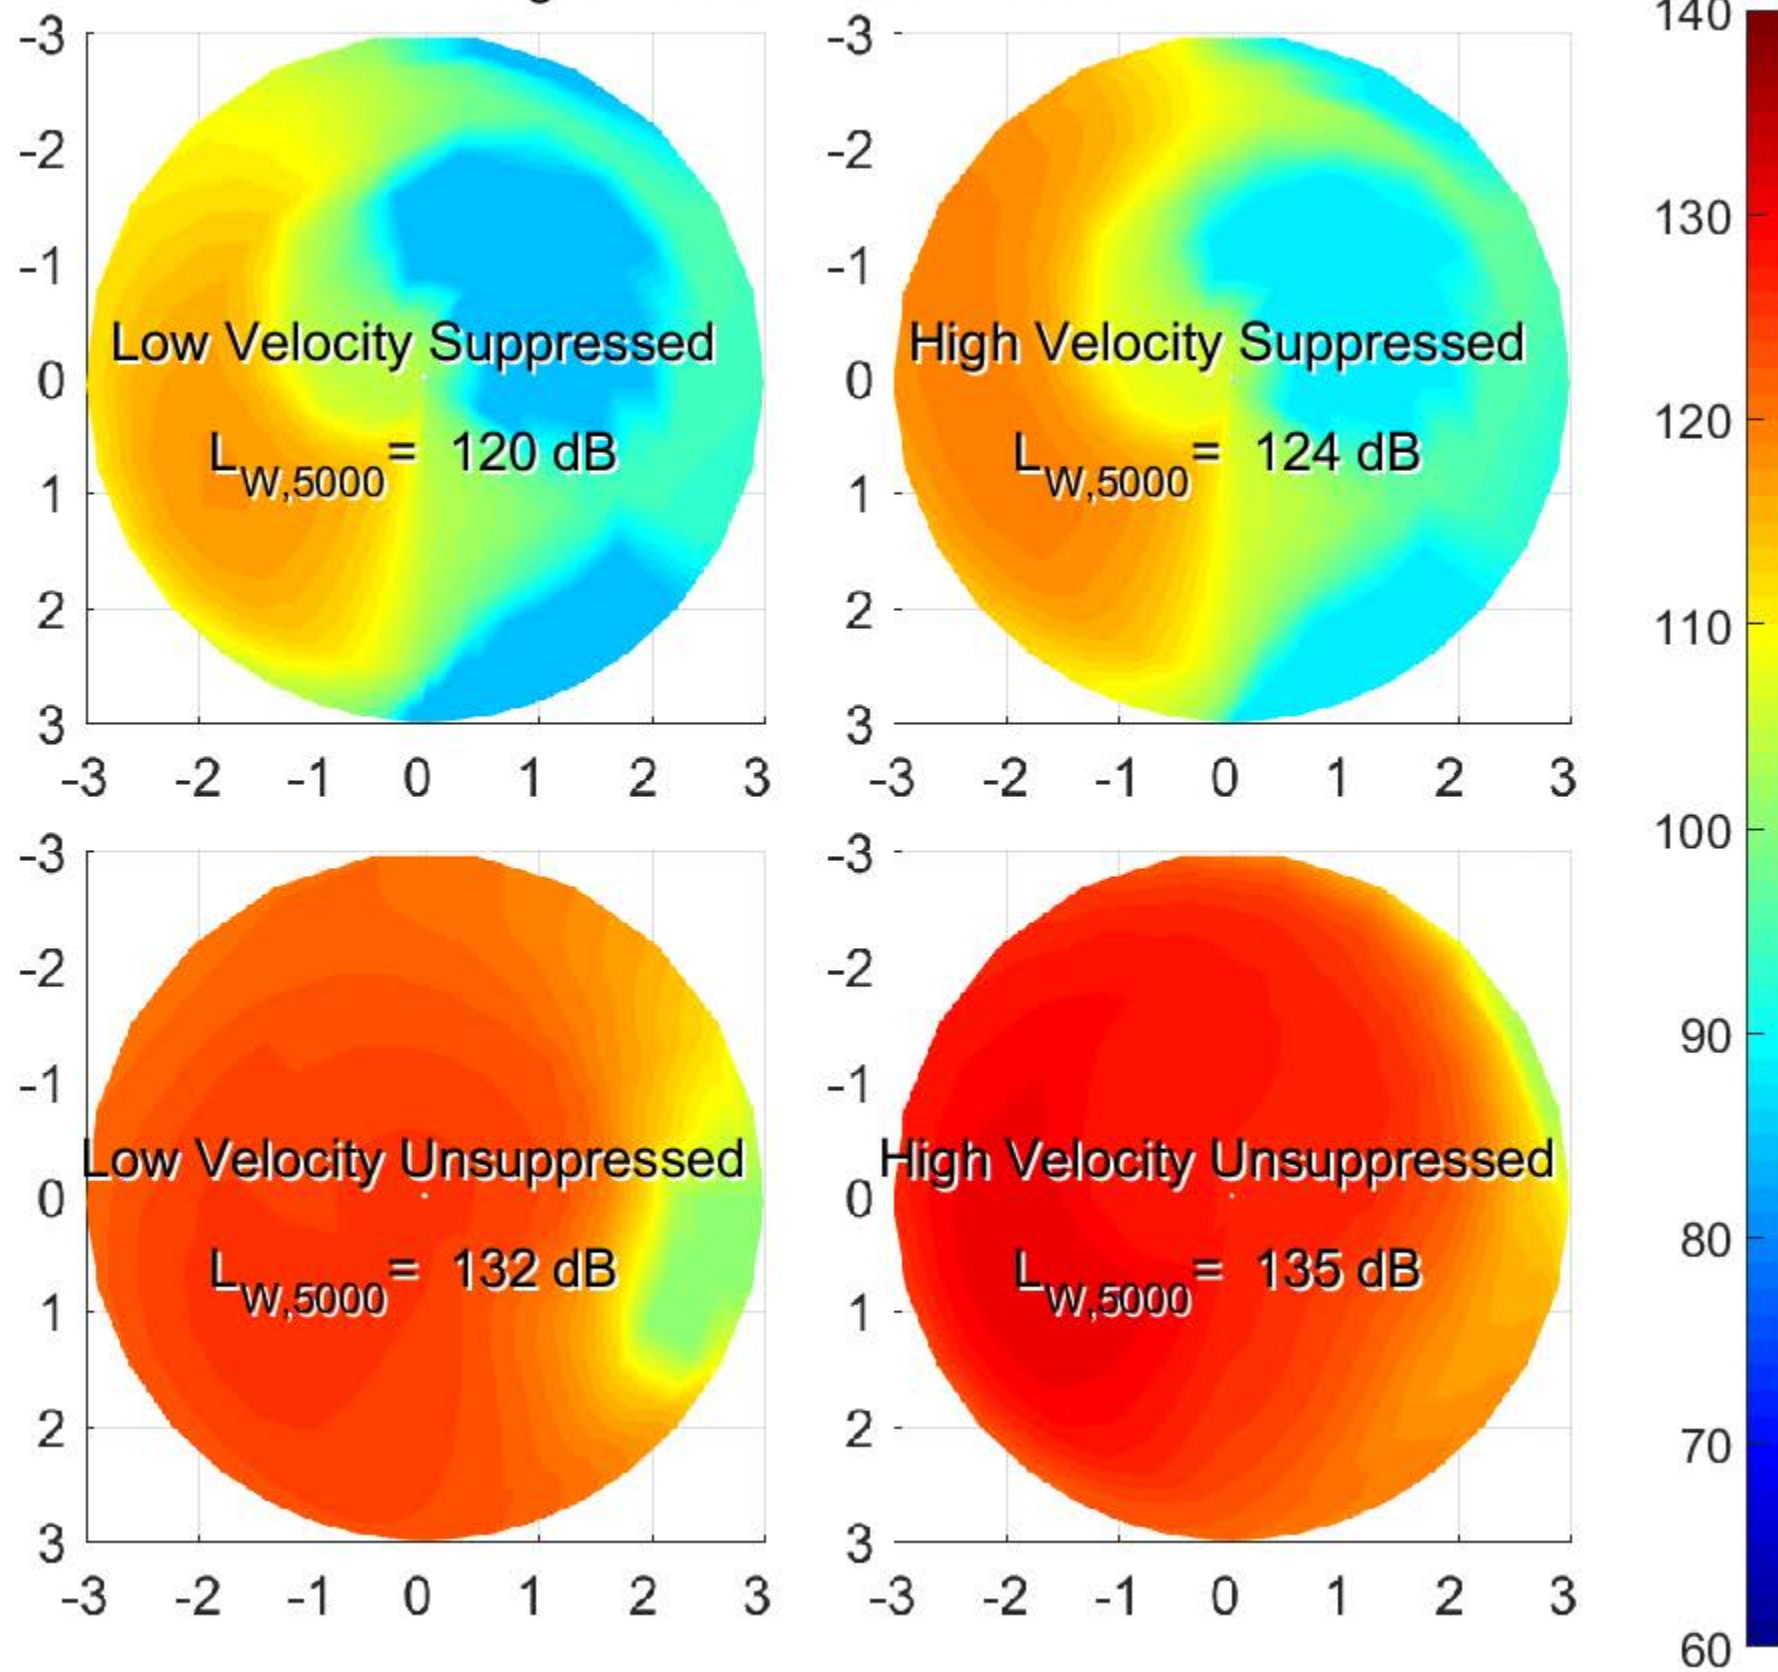

# Ruger .22 cal Pistol 6300 Hz

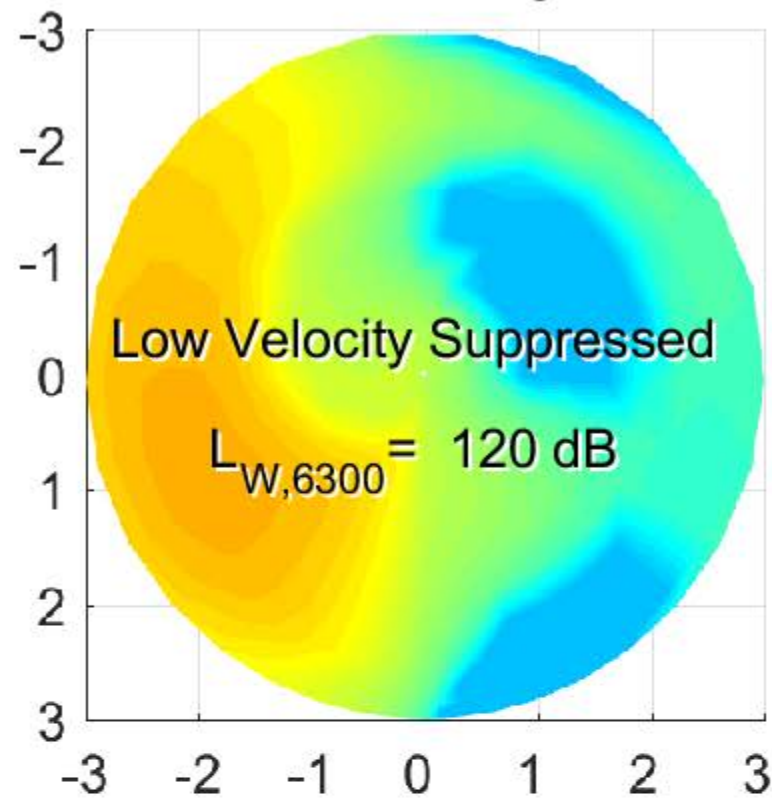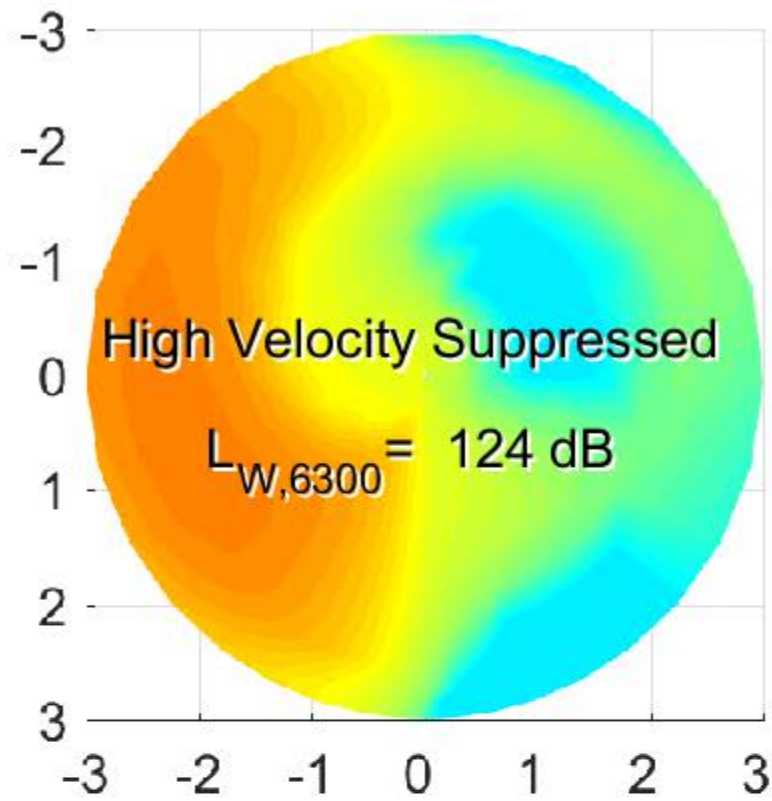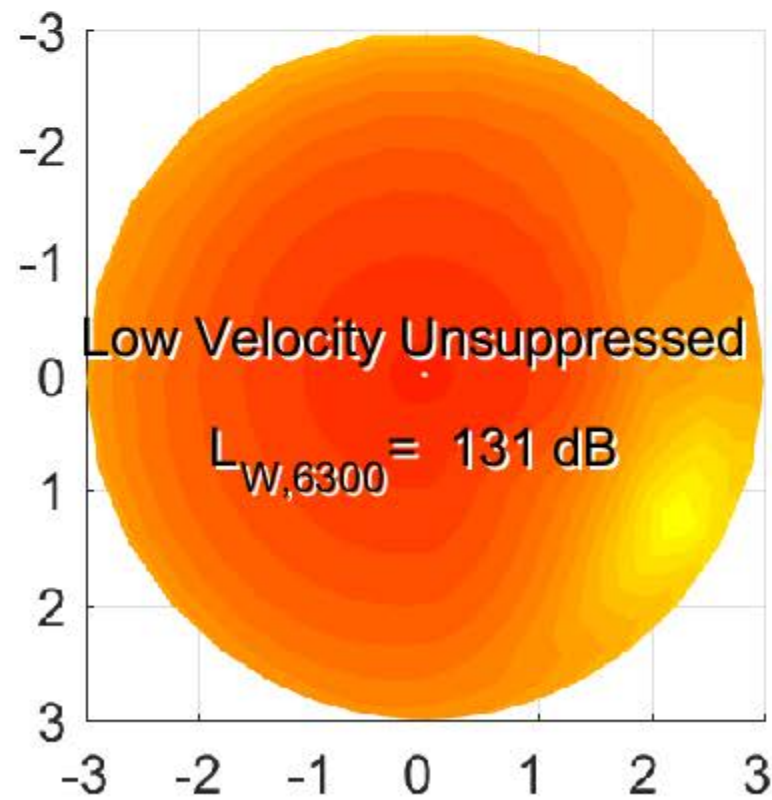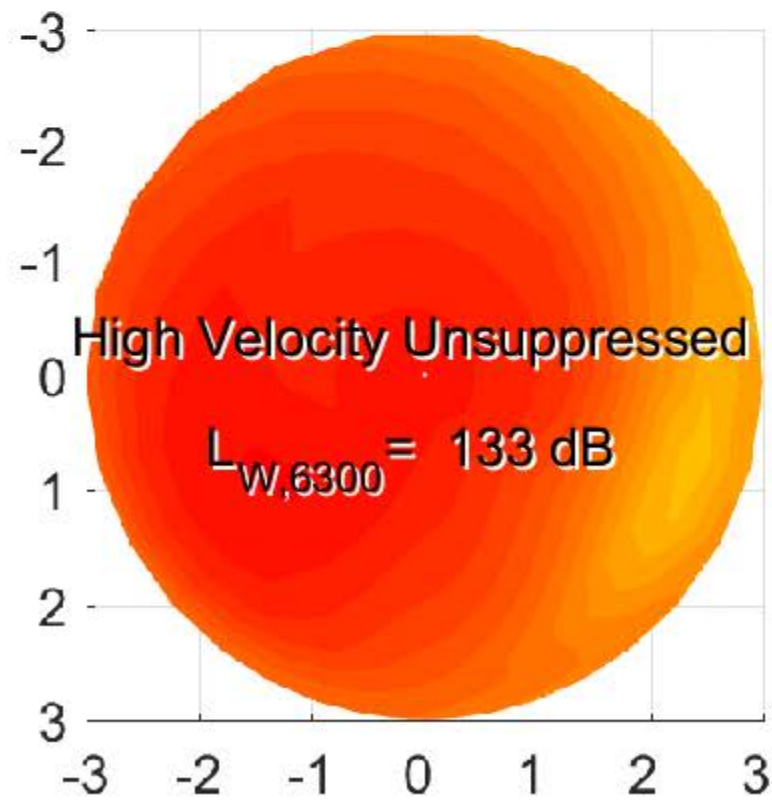

# Ruger .22 cal Pistol 8000 Hz

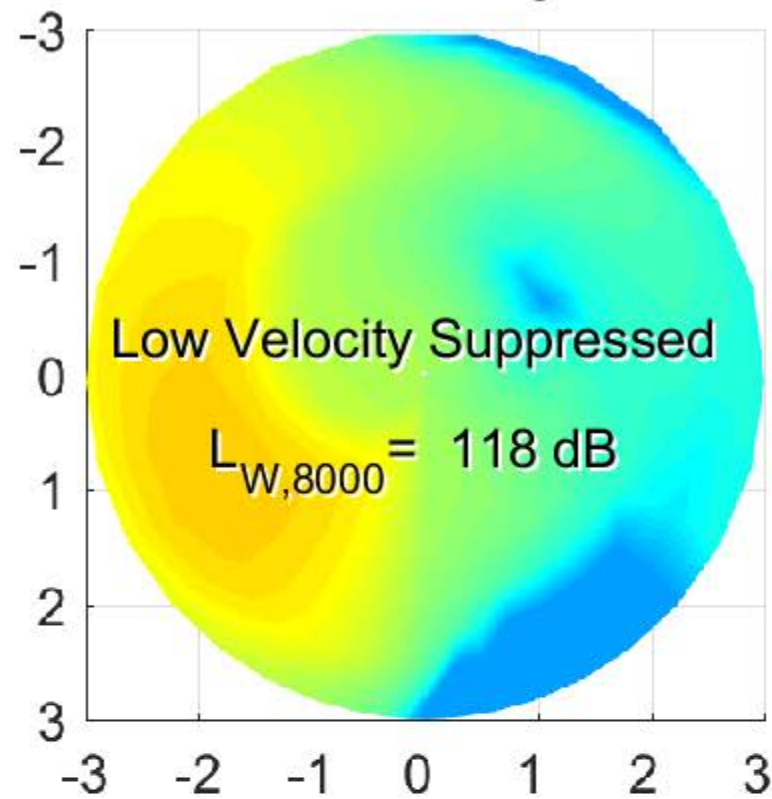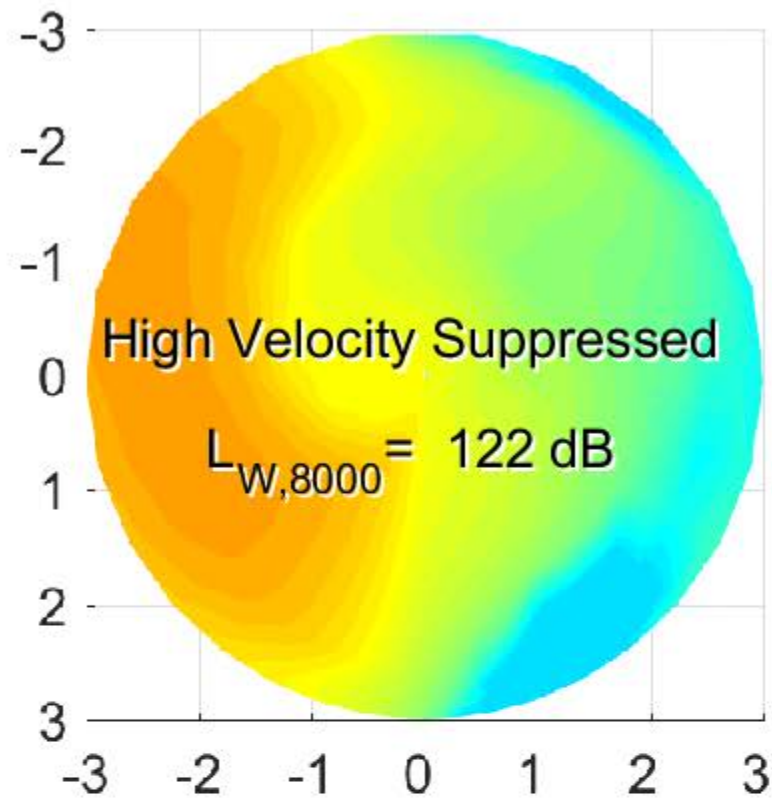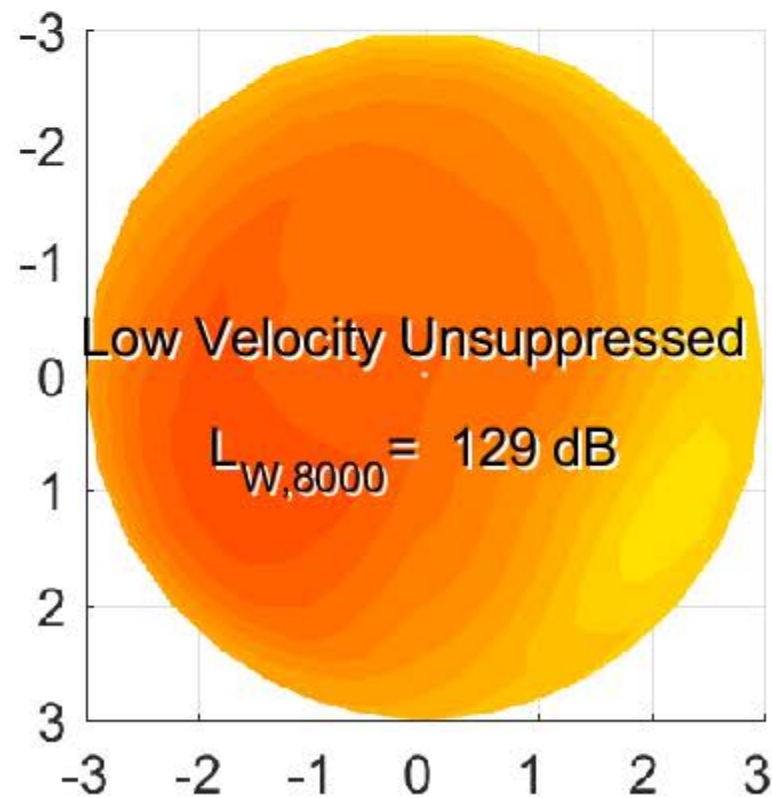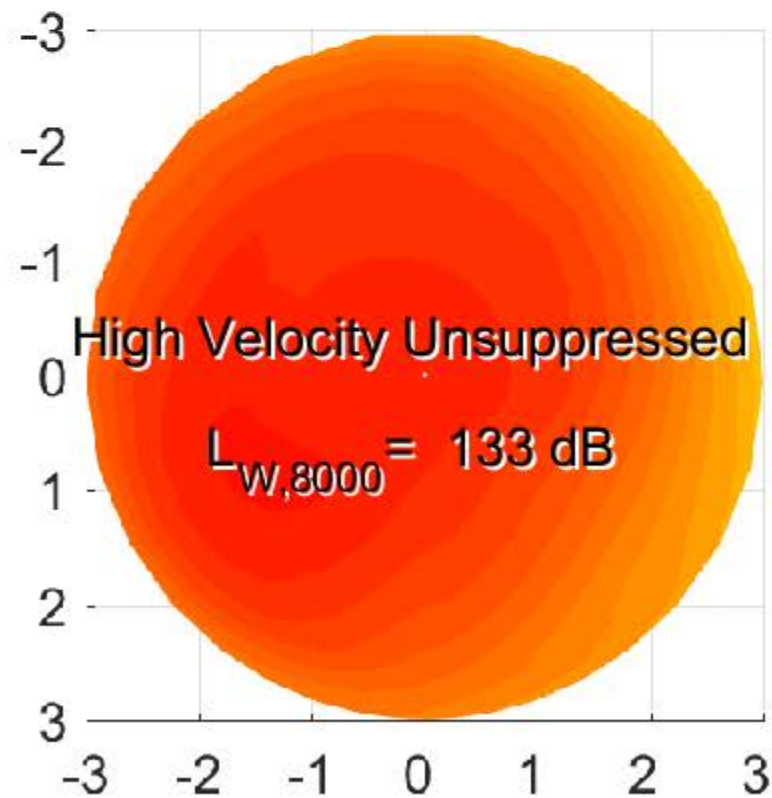

# Ruger .22 cal Pistol 10000 Hz

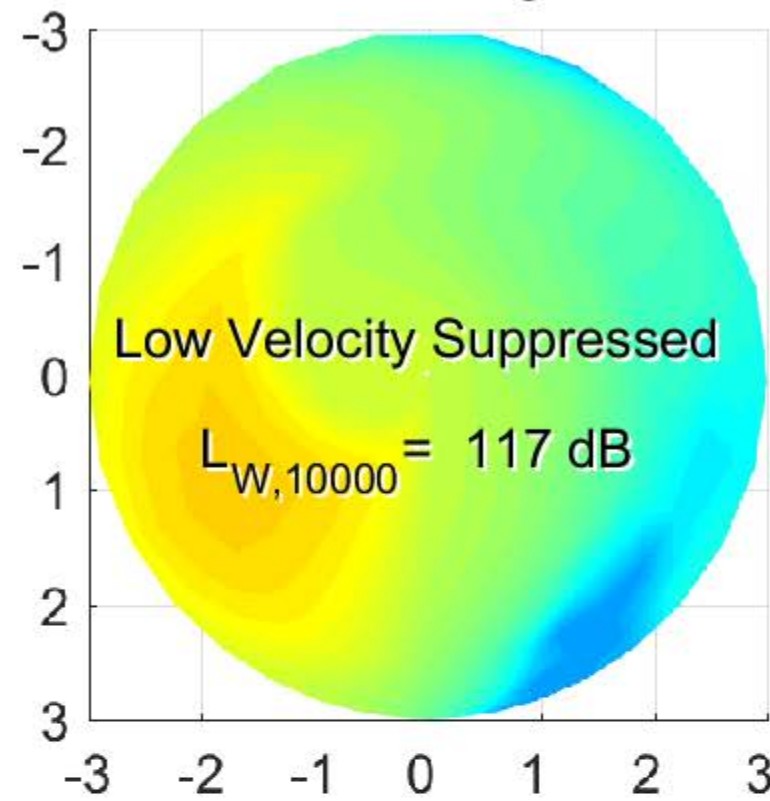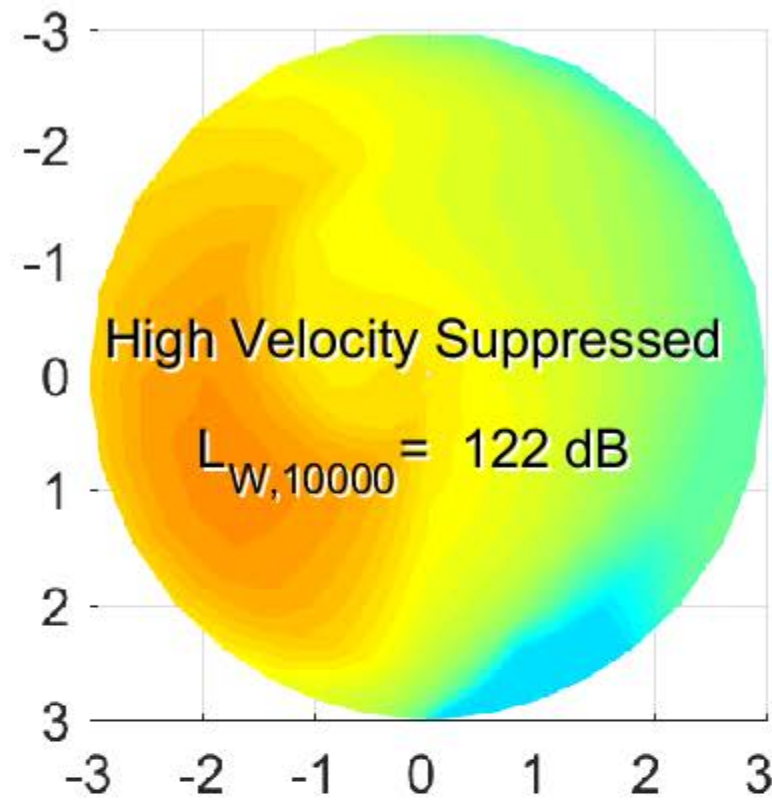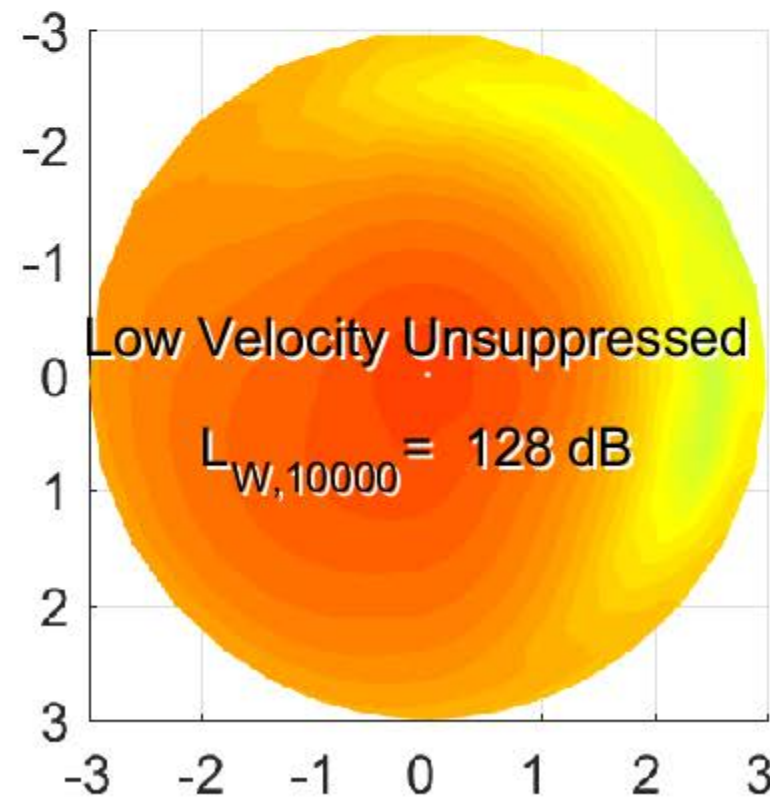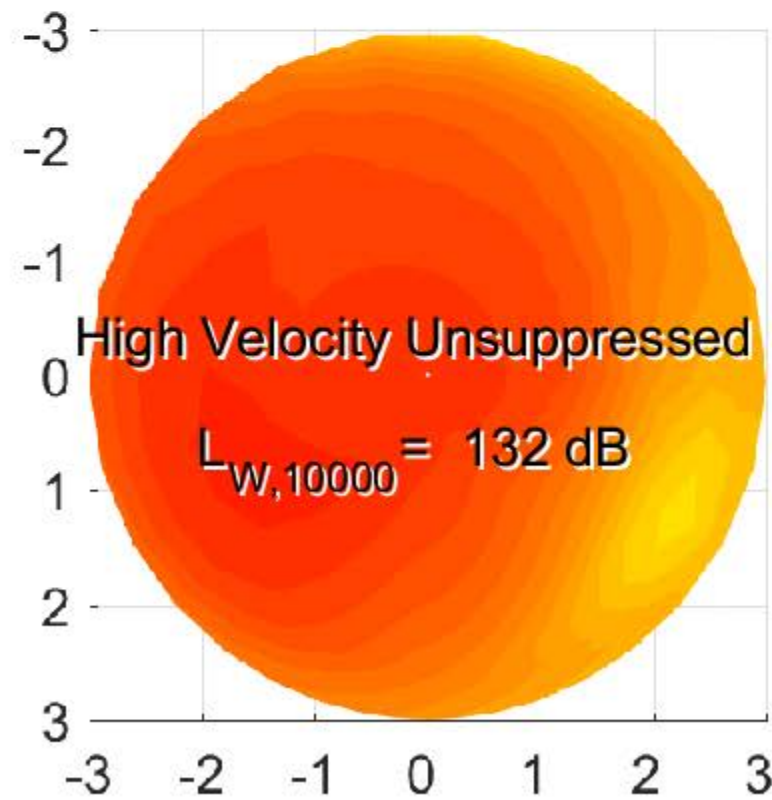

# Ruger .22 cal Pistol 12500 Hz

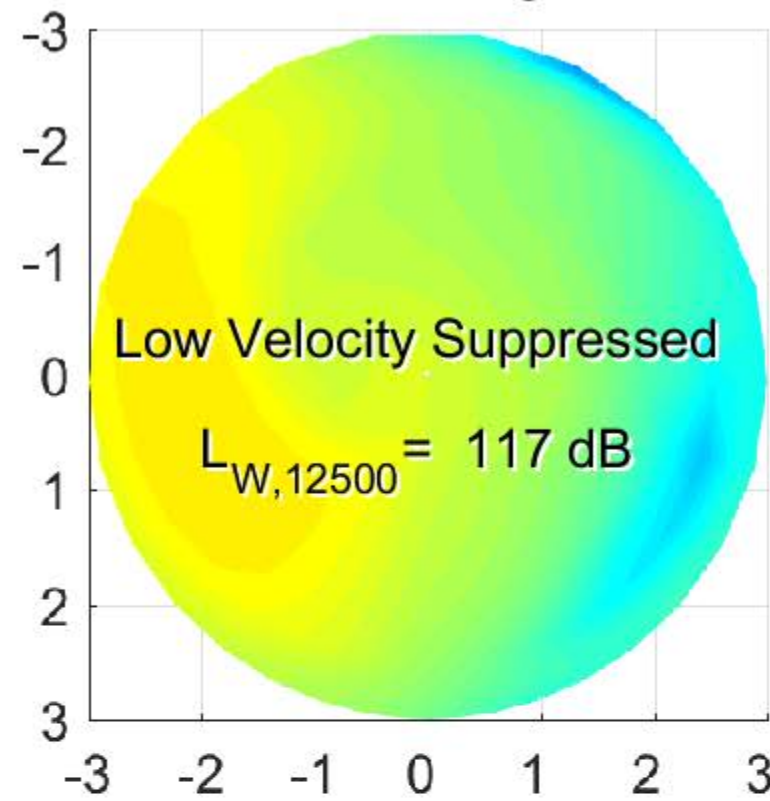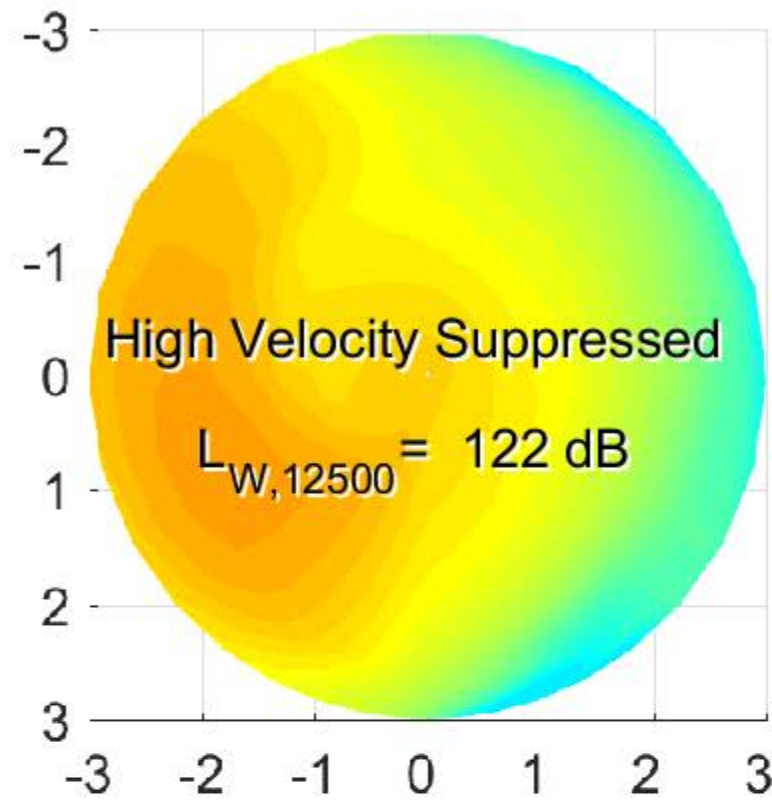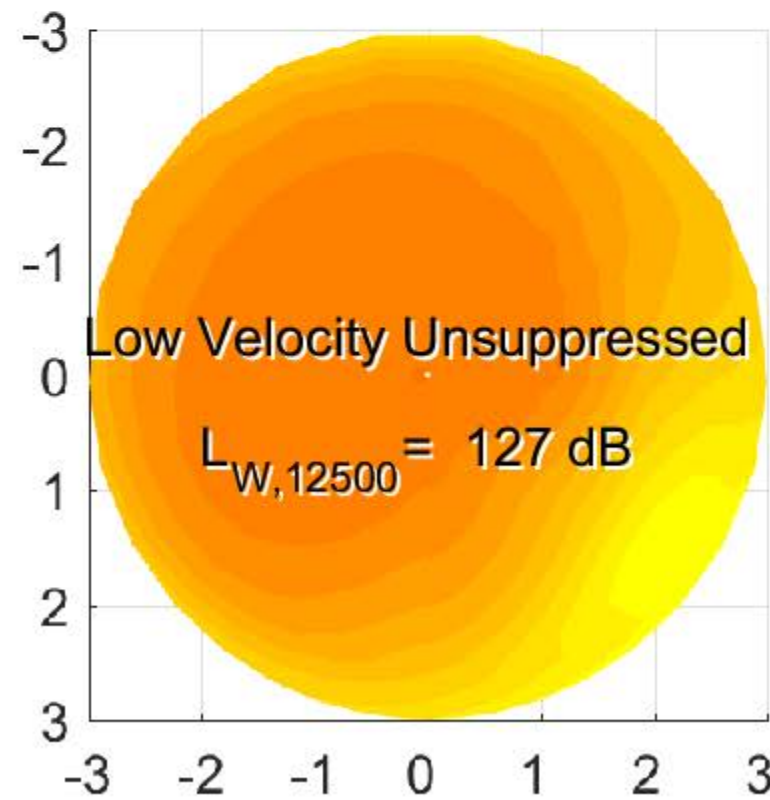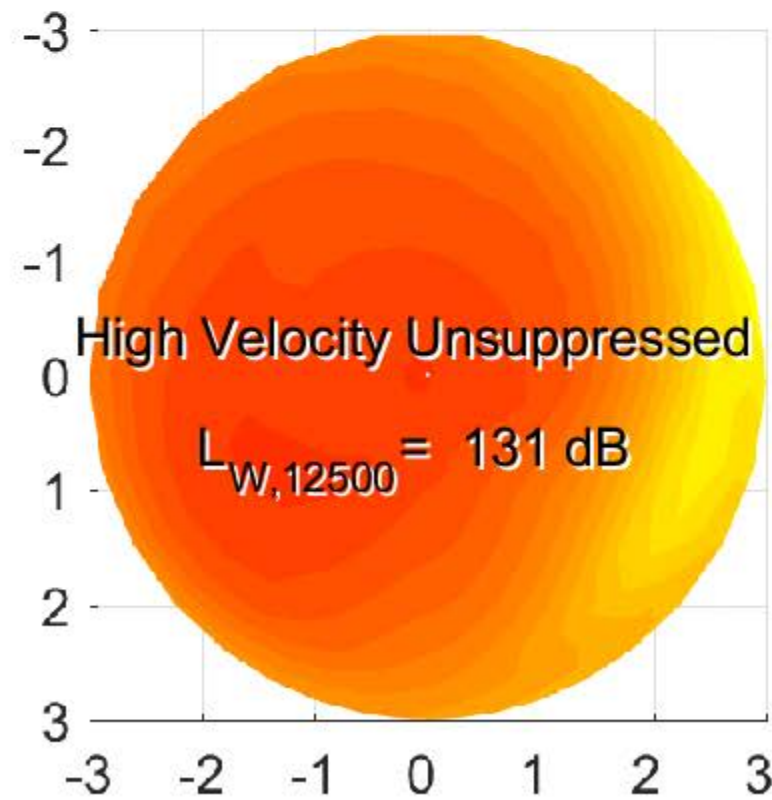

# Ruger .22 cal Pistol 16000 Hz

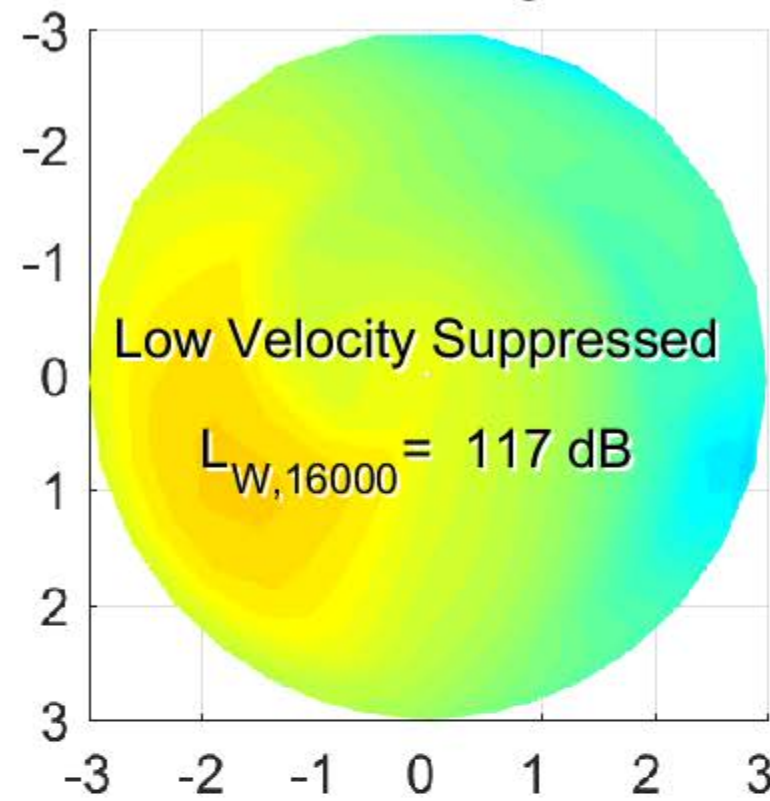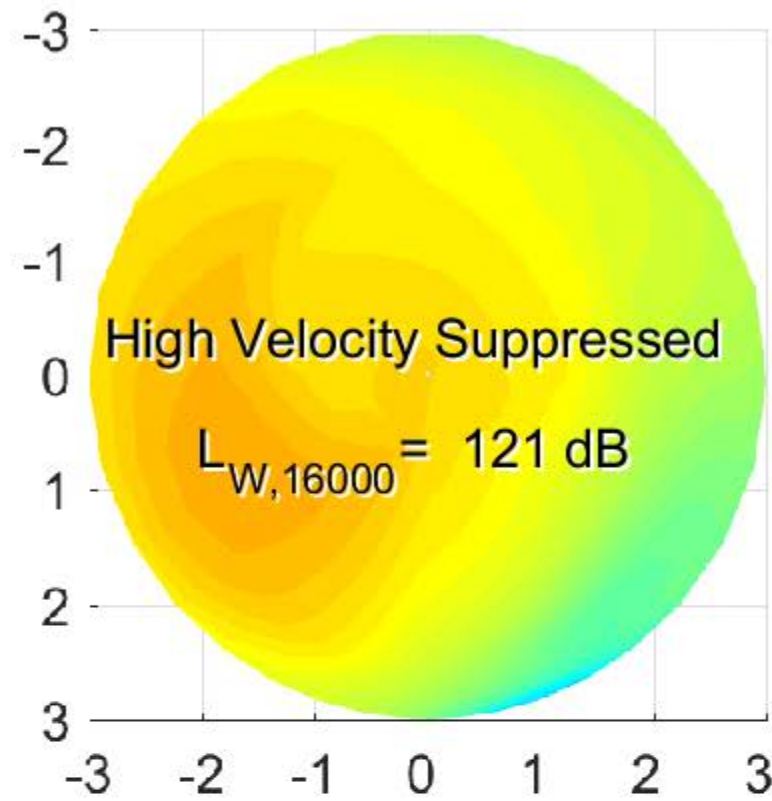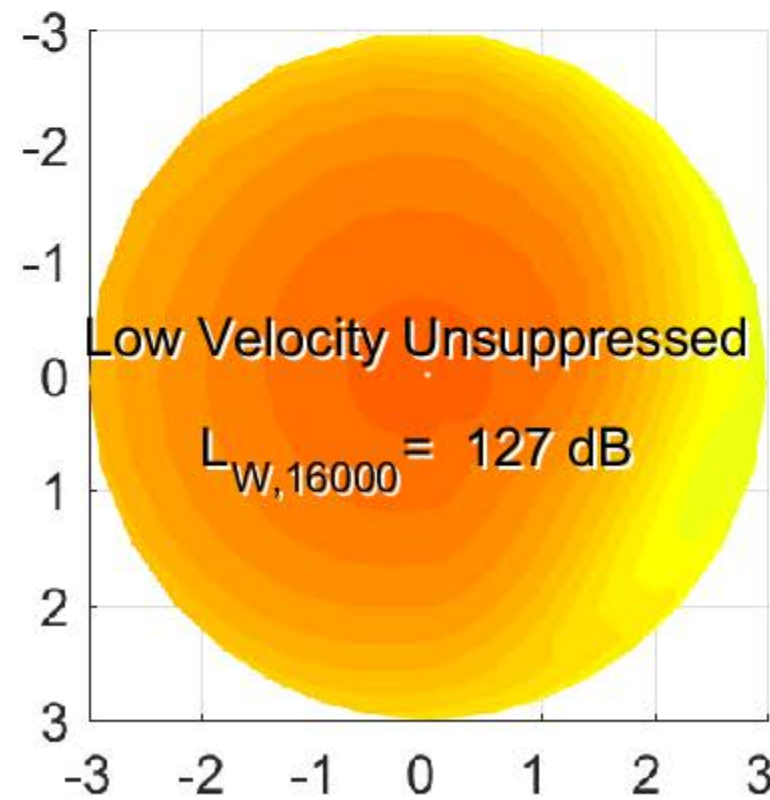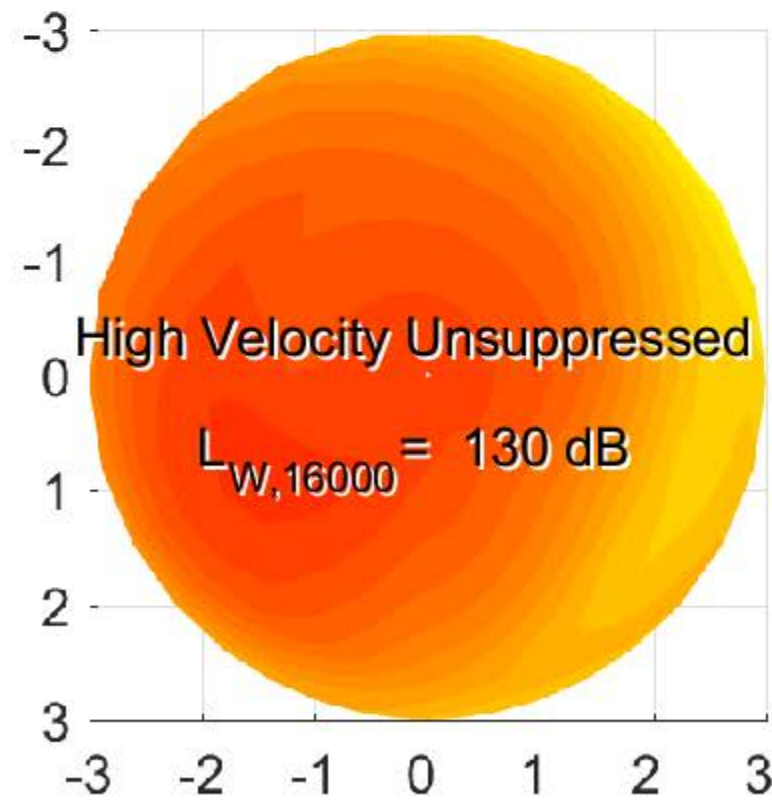

# Ruger .22 cal Pistol 20000 Hz

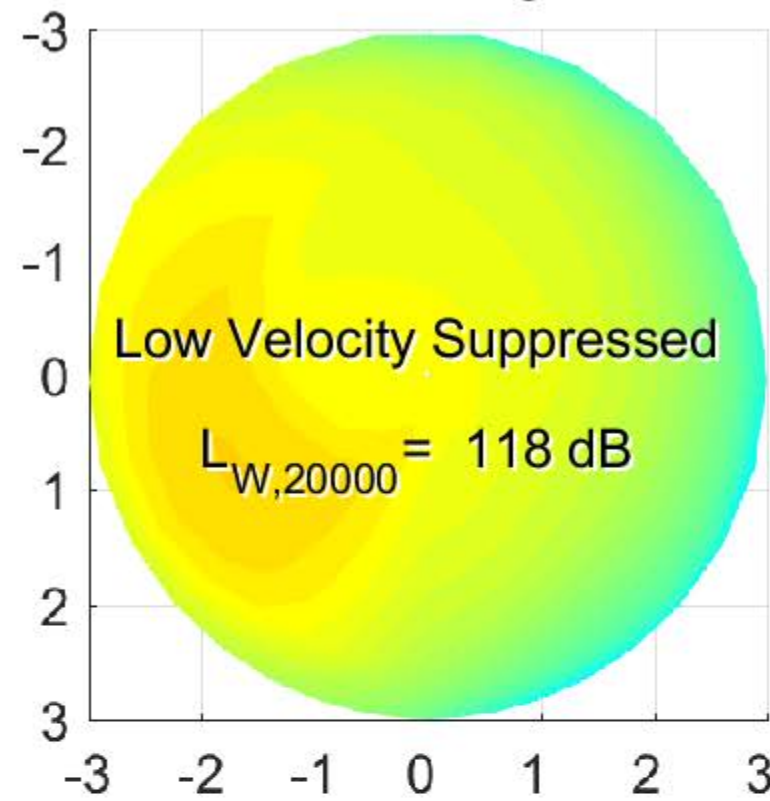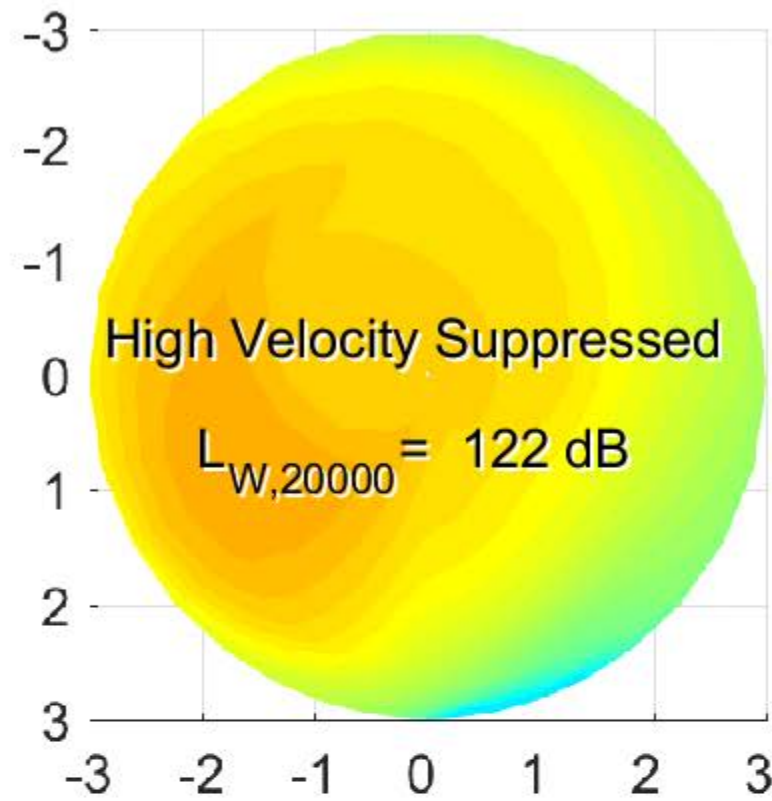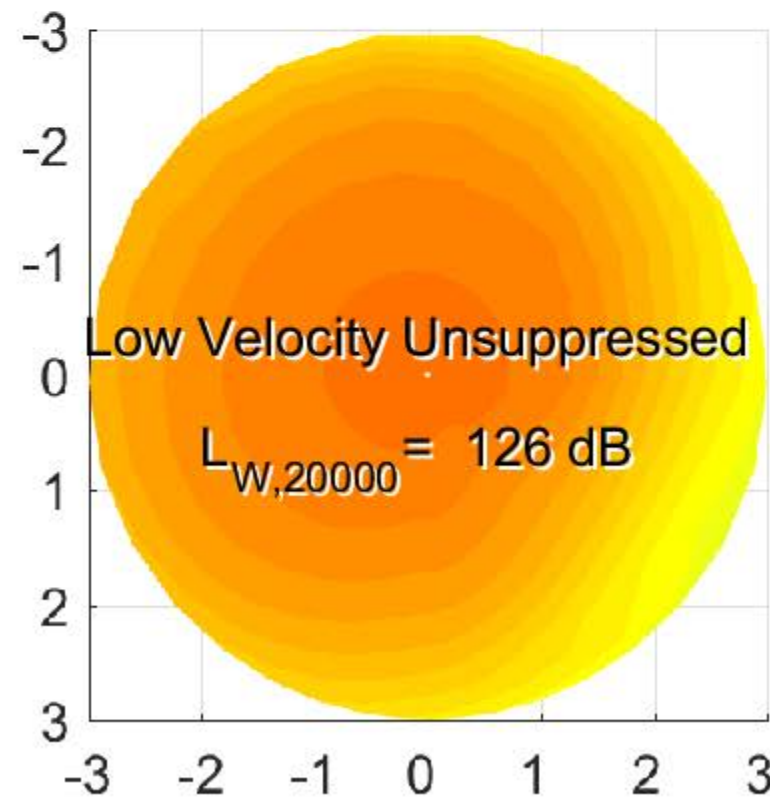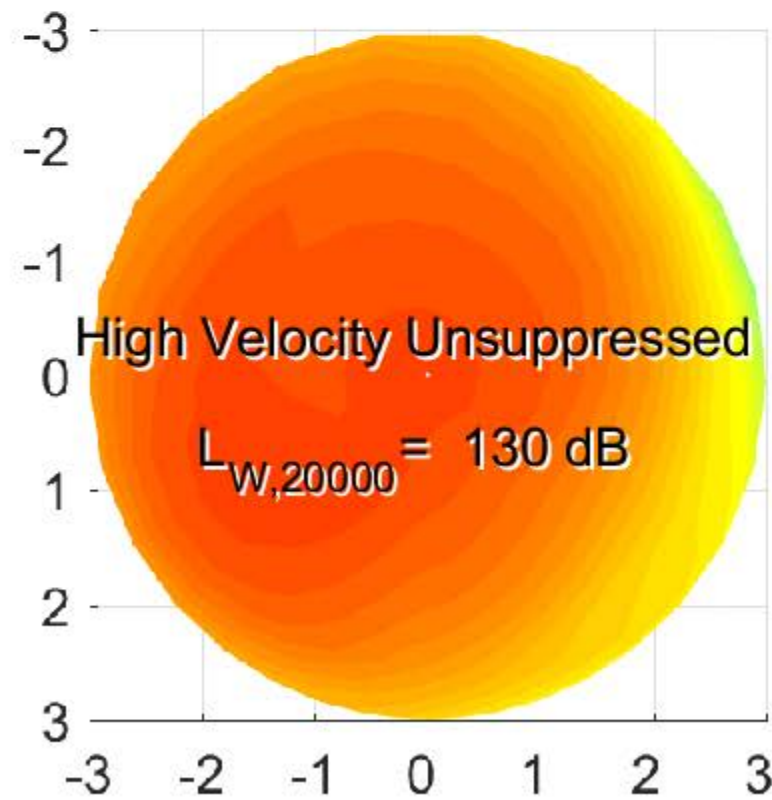

Supplement: Supplementary file 2 [file 1]
